# Supplementary material for: Oral cancer prediction by noninvasive genetic screening
Source: PubMed Central journal article supplement — Int J Cancer. 2022 Sep 18;152(2):227–38. doi: 10.1002/ijc.34277 (PMC9826173; doi:10.1002/ijc.34277), 2022-09-18
Supplement: IJC-152-227-s001.pdf [file IJC-152-227-s001.pdf]

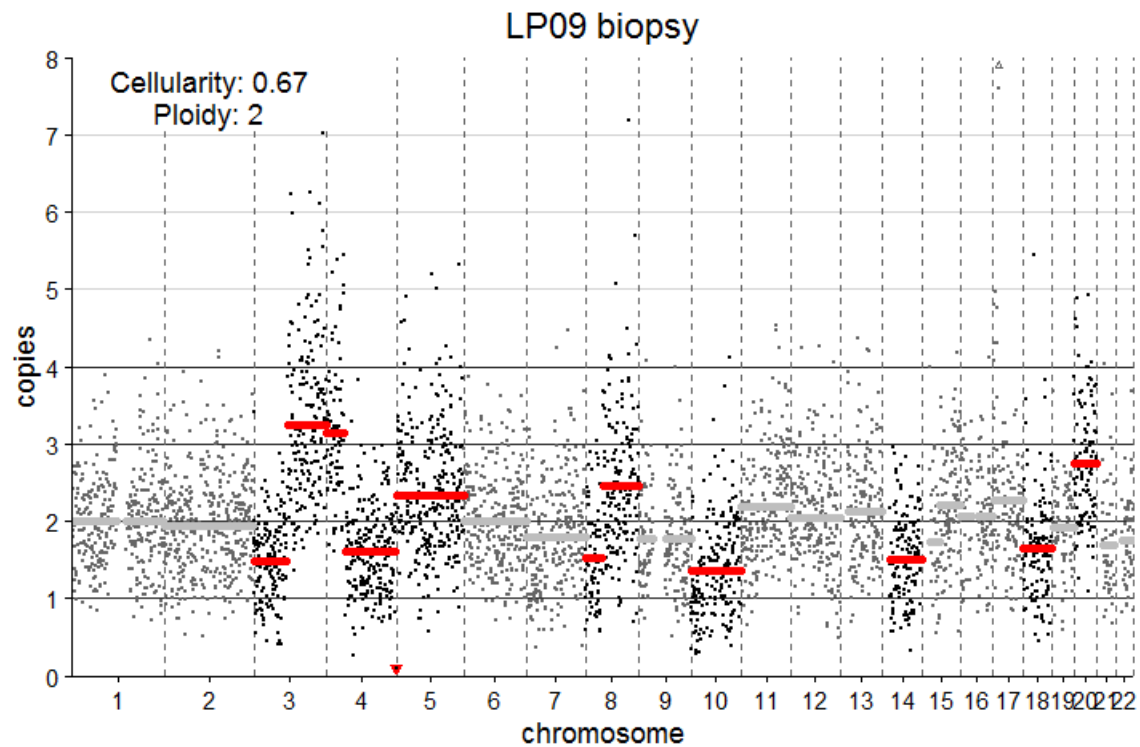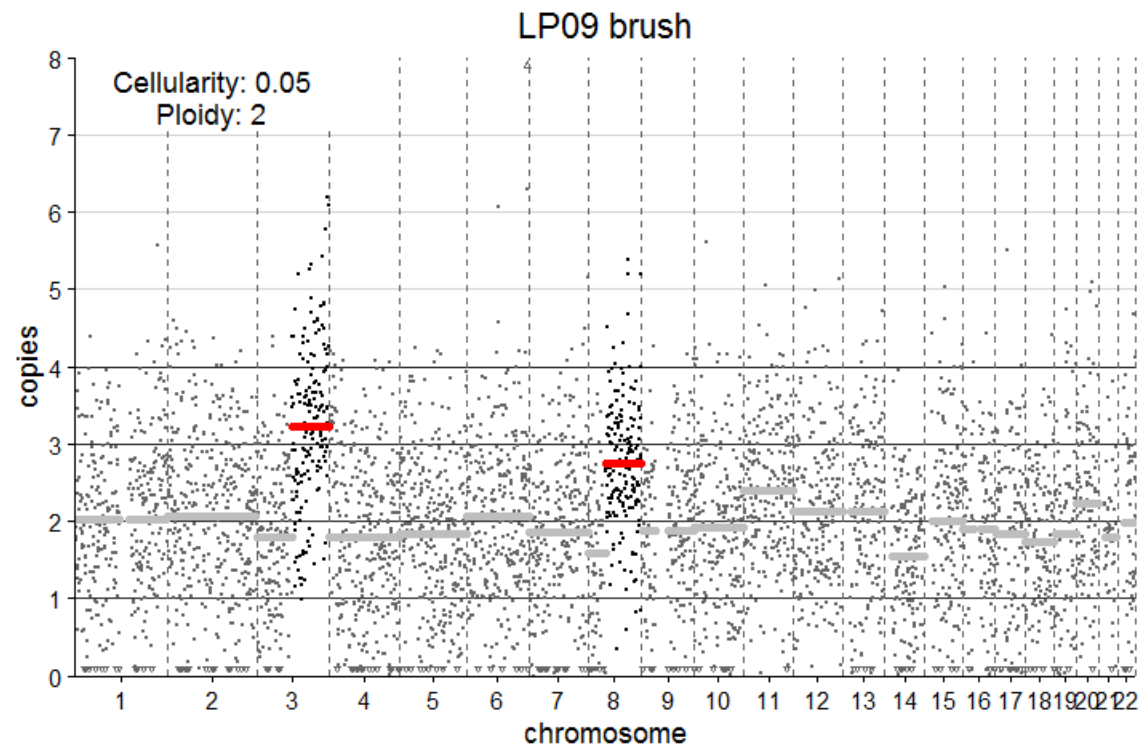

| Sample      | Chr   | Pos       | Gene   | REF | ALT | read depth | ref reads | alt reads | VAF (%) | Change      | Coverage    |      |      |     |
|-------------|-------|-----------|--------|-----|-----|------------|-----------|-----------|---------|-------------|-------------|------|------|-----|
|             |       |           |        |     |     |            |           |           |         |             | Sample      | Mean | Max  | Min |
| LP09-biopsy | chr2  | 202139659 | CASP8  | C   | T   | 50         | 45        | 5         | 10      | p.Gln274*   |             |      |      |     |
| LP09-biopsy | chr3  | 178936091 | PIK3CA | G   | A   | 53         | 47        | 6         | 11      | p.Glu545Lys | LP09-biopsy | 62   | 221  | 11  |
| LP09-biopsy | chr4  | 153268218 | FBXW7  | G   | T   | 70         | 65        | 5         | 7       | p.Thr197Asn |             |      |      |     |
| LP09-biopsy | chr9  | 21971186  | CDKN2A | G   | A   | 77         | 26        | 51        | 66      | p.Arg58*    | LP09-brush  | 1296 | 2392 | 254 |
| LP09-biopsy | chr17 | 7574003   | TP53   | G   | A   | 51         | 16        | 35        | 69      | p.Arg342*   |             |      |      |     |
| LP09-brush  | chr9  | 21971186  | CDKN2A | G   | A   | 744        | 704       | 40        | 5.4     | p.Arg58*    |             |      |      |     |
| LP09-brush  | chr17 | 7574003   | TP53   | G   | A   | 1161       | 1113      | 48        | 4.1     | p.Arg342*   |             |      |      |     |

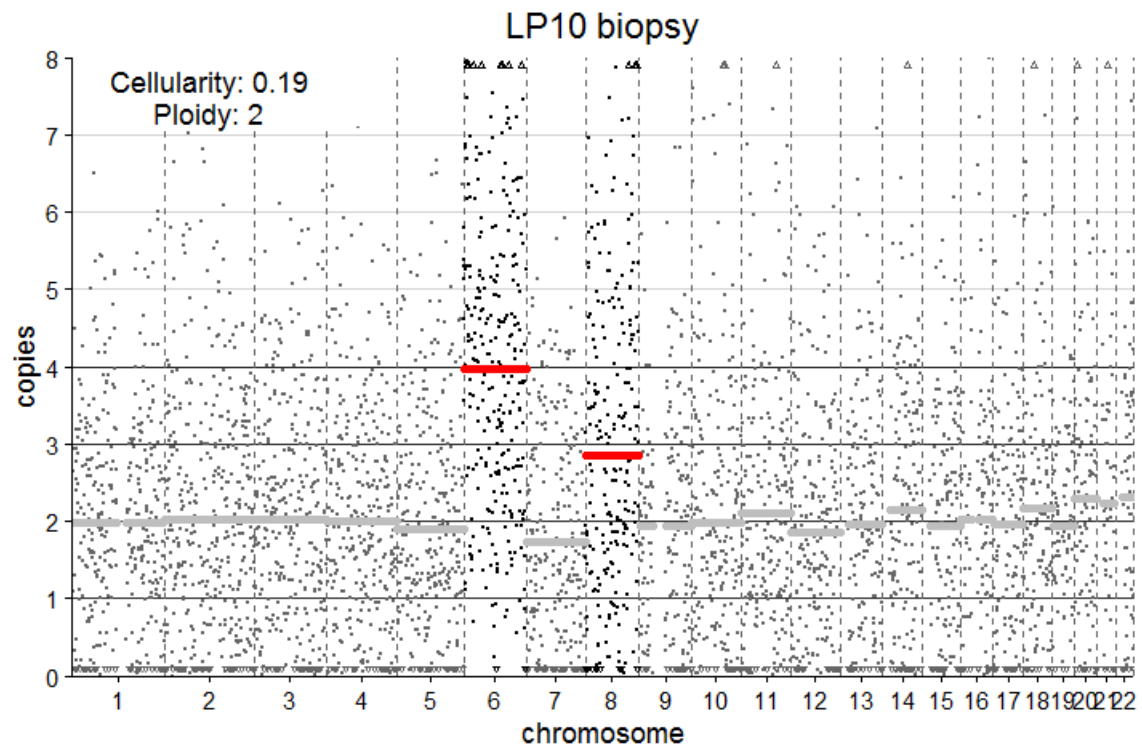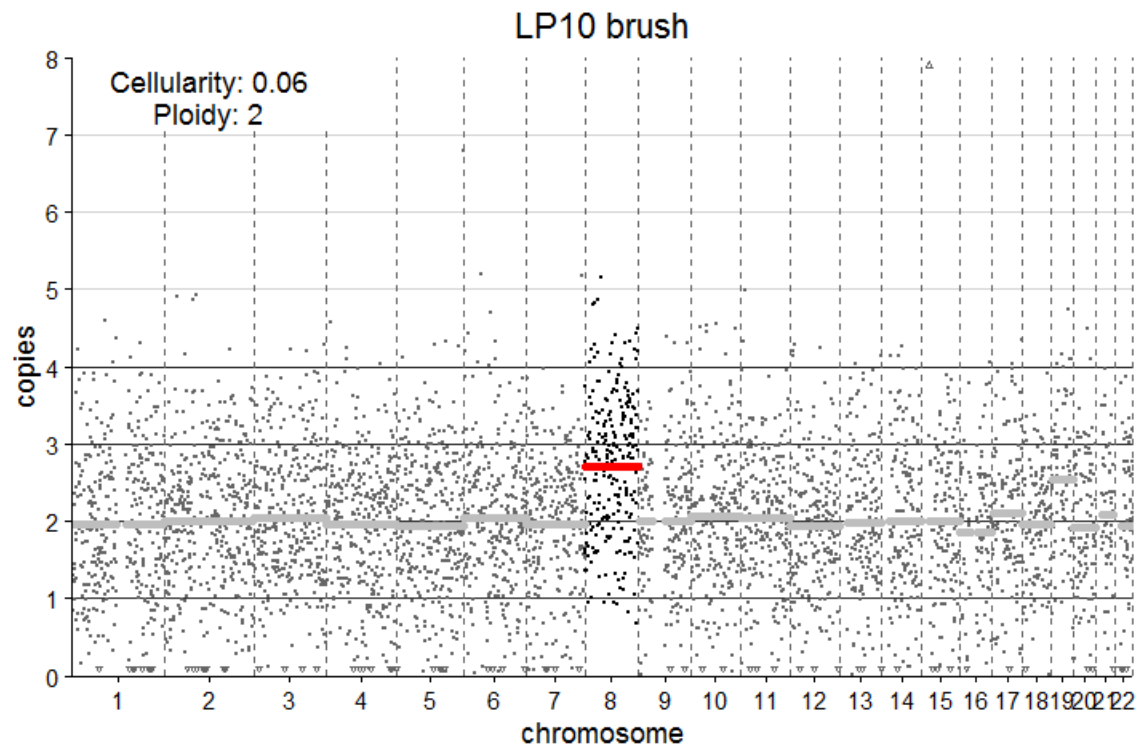

| Sample      | Coverage |      |     |
|-------------|----------|------|-----|
|             | Mean     | Max  | Min |
| LP10-biopsy | 735      | 2082 | 108 |
| LP10-brush  | 1841     | 3098 | 404 |

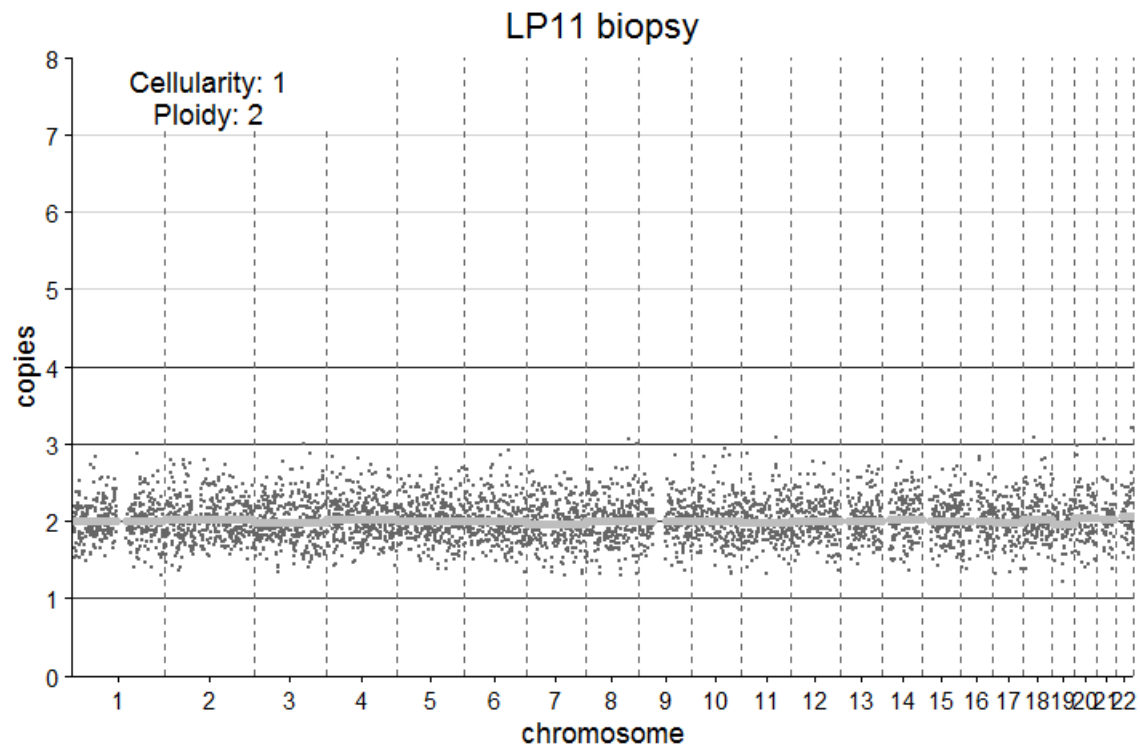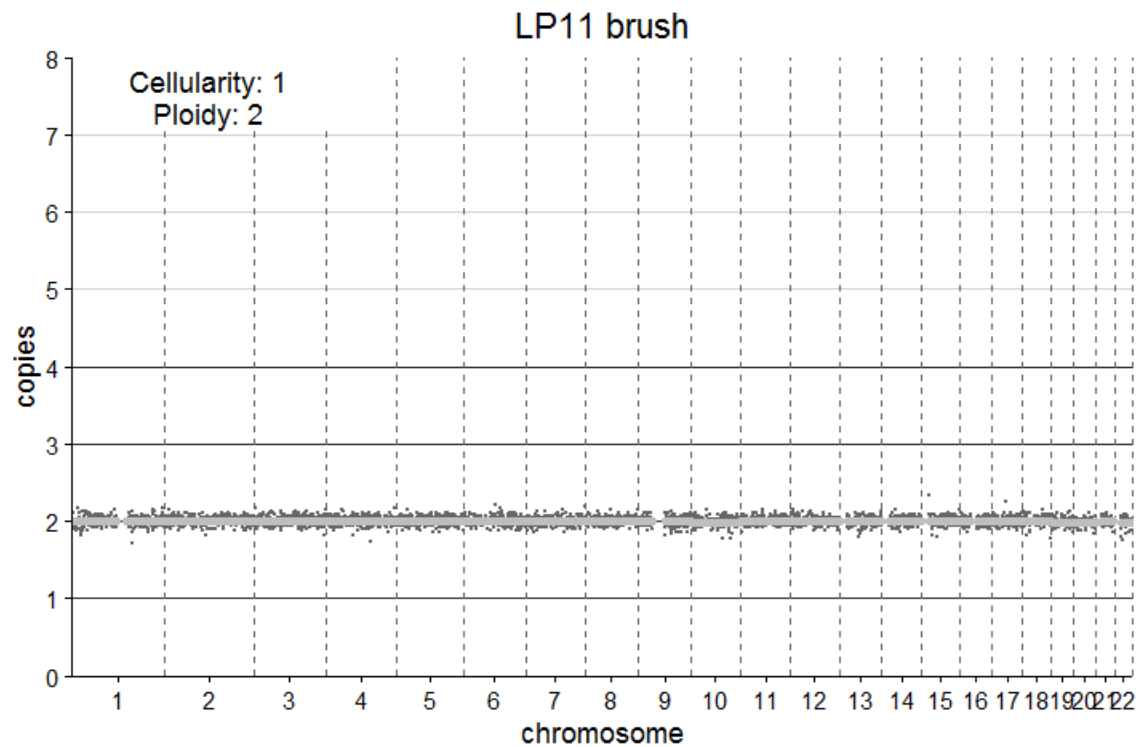

| Sample      | Chr  | Pos       | Gene   | REF | ALT | read depth | ref reads | alt reads | VAF (%) | Change      | Coverage    |      |      |     |
|-------------|------|-----------|--------|-----|-----|------------|-----------|-----------|---------|-------------|-------------|------|------|-----|
|             |      |           |        |     |     |            |           |           |         |             | Sample      | Mean | Max  | Min |
| LP11-biopsy | chr9 | 139399444 | NOTCH1 | C   | CG  | 583        | 506       | 76        | 13.06   | p.Glu1567fs | LP11-biopsy | 344  | 942  | 88  |
| LP11-biopsy | chr9 | 139409752 | NOTCH1 | C   | CGG | 451        | 406       | 45        | 9.98    | p.Gly669fs  | LP11-brush  | 1332 | 2104 | 218 |

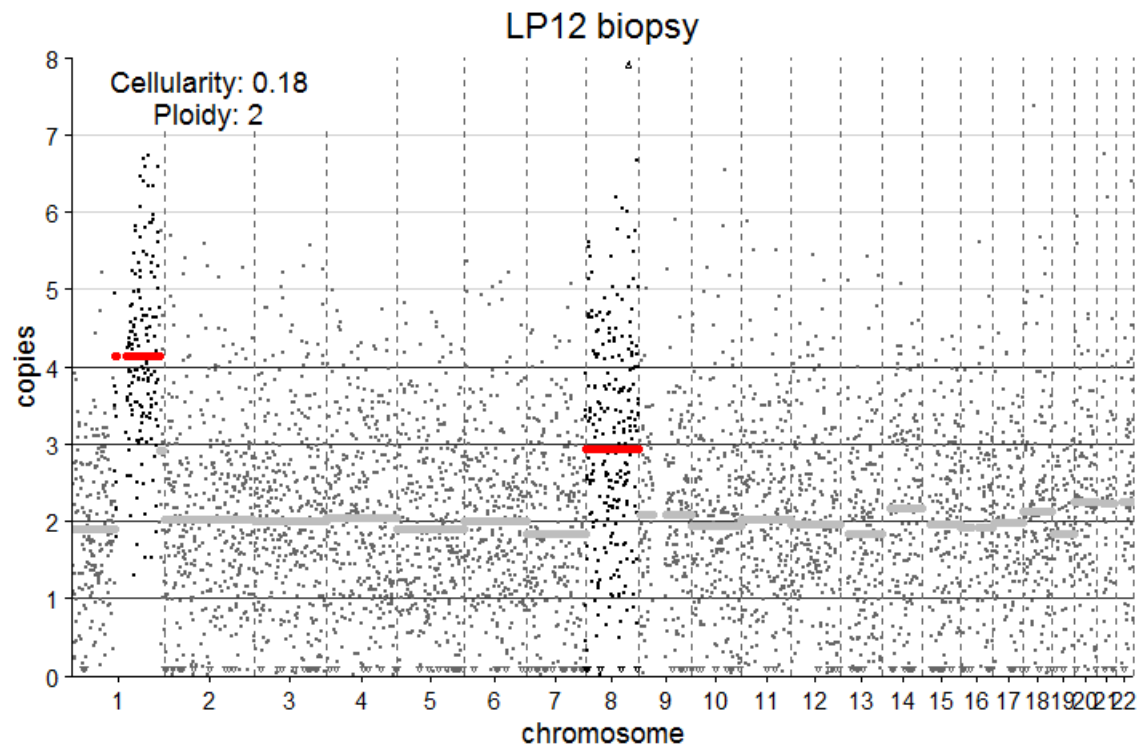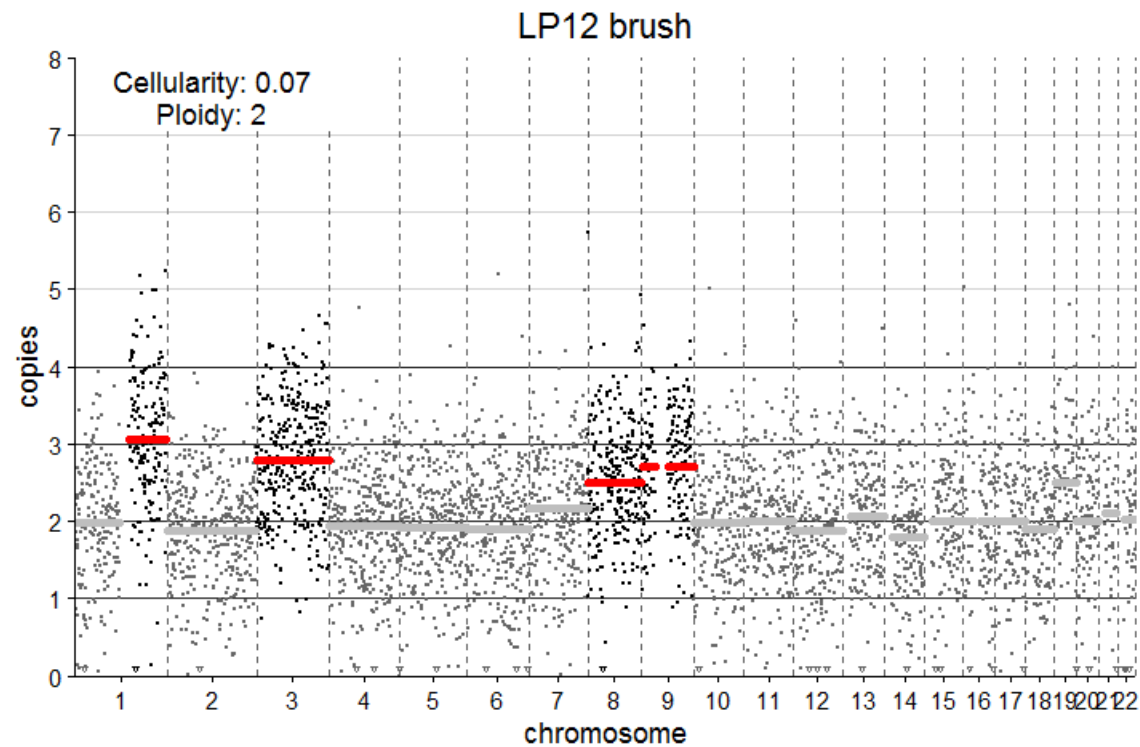

| Sample      | Chr   | Pos       | Gene | REF | ALT | read depth | ref reads | alt reads | VAF (%) | Change       | Coverage    |      |      |     |
|-------------|-------|-----------|------|-----|-----|------------|-----------|-----------|---------|--------------|-------------|------|------|-----|
|             |       |           |      |     |     |            |           |           |         |              | Sample      | Mean | Max  | Min |
| LP12-biopsy | chr5  | 176709532 | NSD1 | T   | G   | 451        | 420       | 31        | 6.9     | p.Tyr1987Asp | LP12-biopsy | 729  | 1911 | 88  |
| LP12-brush  | chr10 | 89692904  | PTEN | C   | T   | 1690       | 1641      | 49        | 2.9     | p.Arg130*    | LP12-brush  | 1808 | 4033 | 429 |
| LP12-brush  | chr10 | 89692936  | PTEN | A   | T   | 1689       | 1646      | 43        | 2.55    | p.Leu140Phe  | LP12-brush  | 1808 | 4033 | 429 |

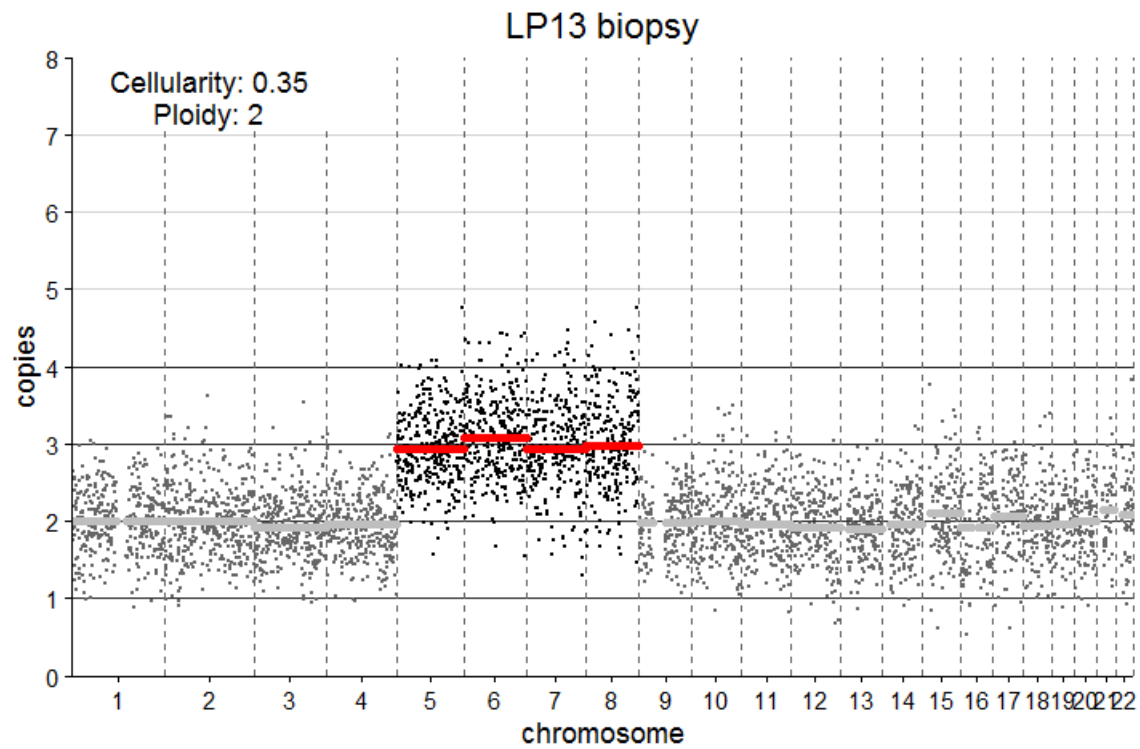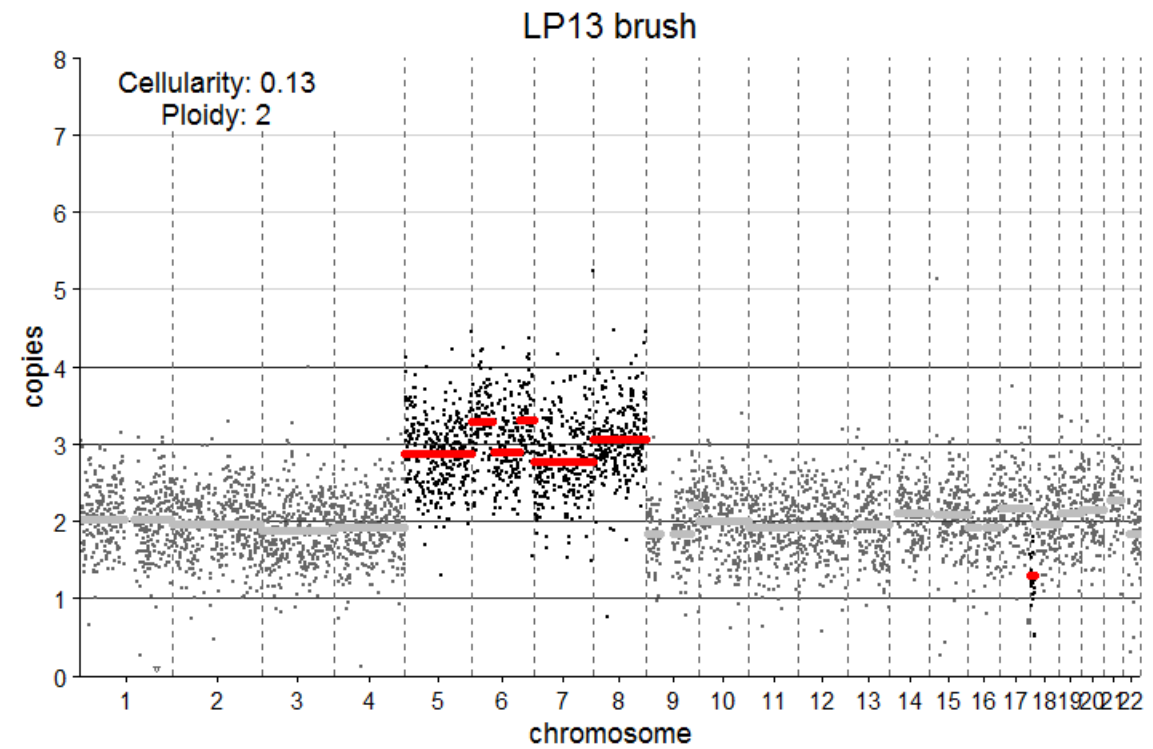

| Sample      | Chr   | Pos     | Gene | REF | ALT | read depth | ref reads | alt reads | VAF (%) | Change      | Coverage    |      |      |     |
|-------------|-------|---------|------|-----|-----|------------|-----------|-----------|---------|-------------|-------------|------|------|-----|
|             |       |         |      |     |     |            |           |           |         |             | Sample      | Mean | Max  | Min |
| LP13-biopsy | chr17 | 7578281 | TP53 | G   | A   | 544        | 440       | 102       | 19      | p.Pro190Ser | LP13-biopsy | 561  | 1629 | 129 |
| LP13-brush  | chr17 | 7578281 | TP53 | G   | A   | 1233       | 1132      | 101       | 8.2     | p.Pro190Ser | LP13-brush  | 1229 | 2130 | 299 |

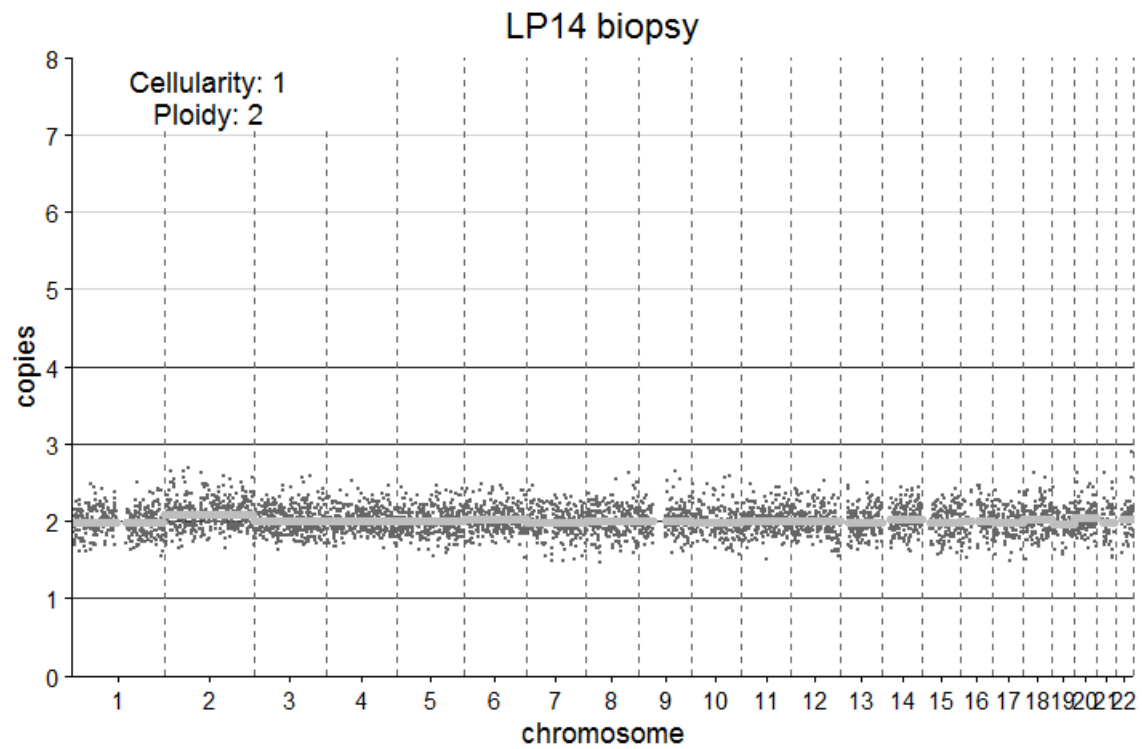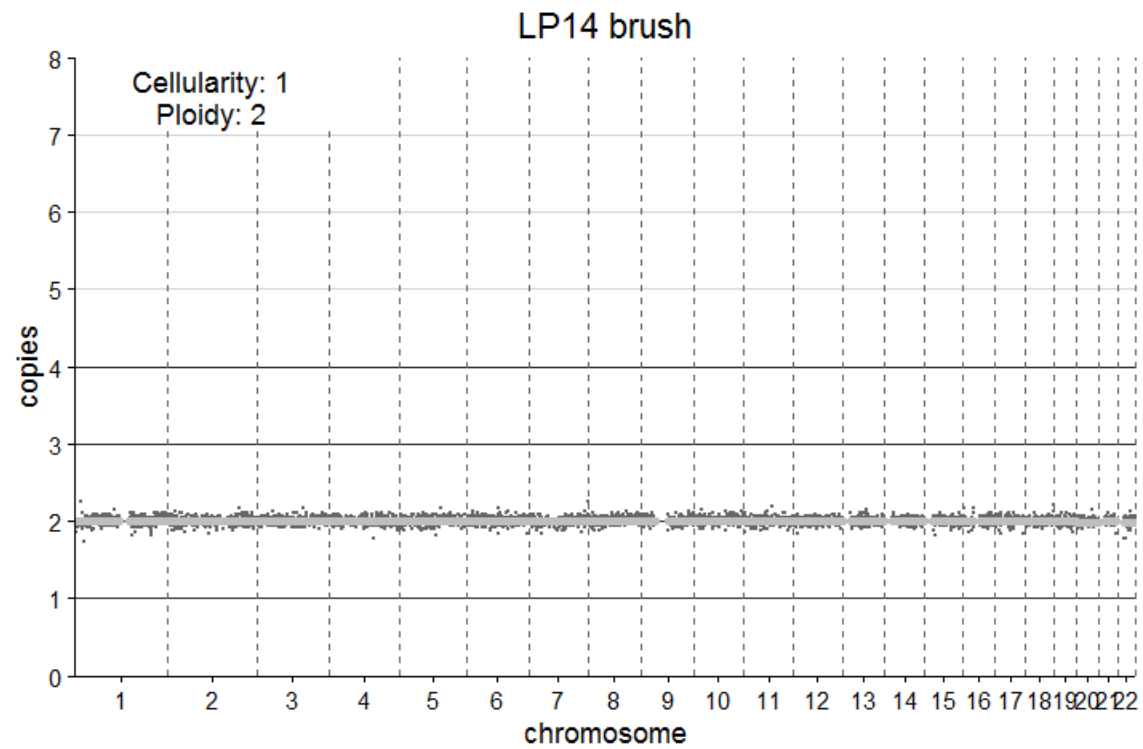

| Sample      | Coverage |      |     |
|-------------|----------|------|-----|
|             | Mean     | Max  | Min |
| LP14-biopsy | 446      | 1024 | 84  |
| LP14-brush  | 1490     | 2469 | 307 |

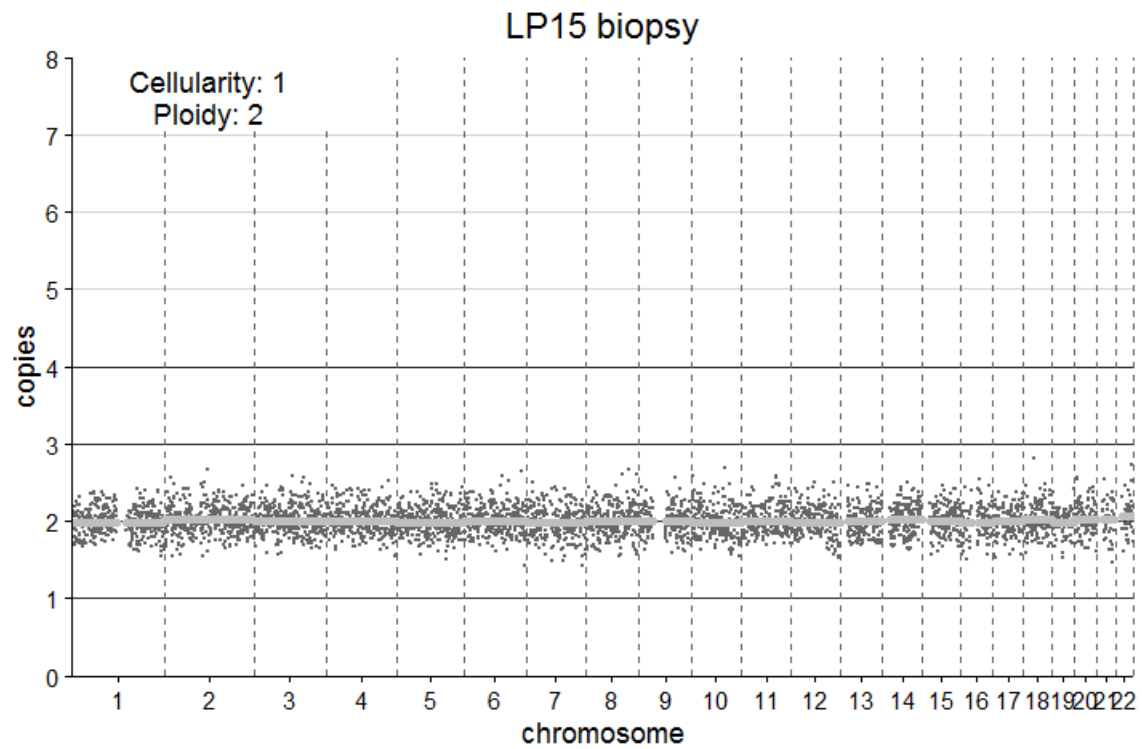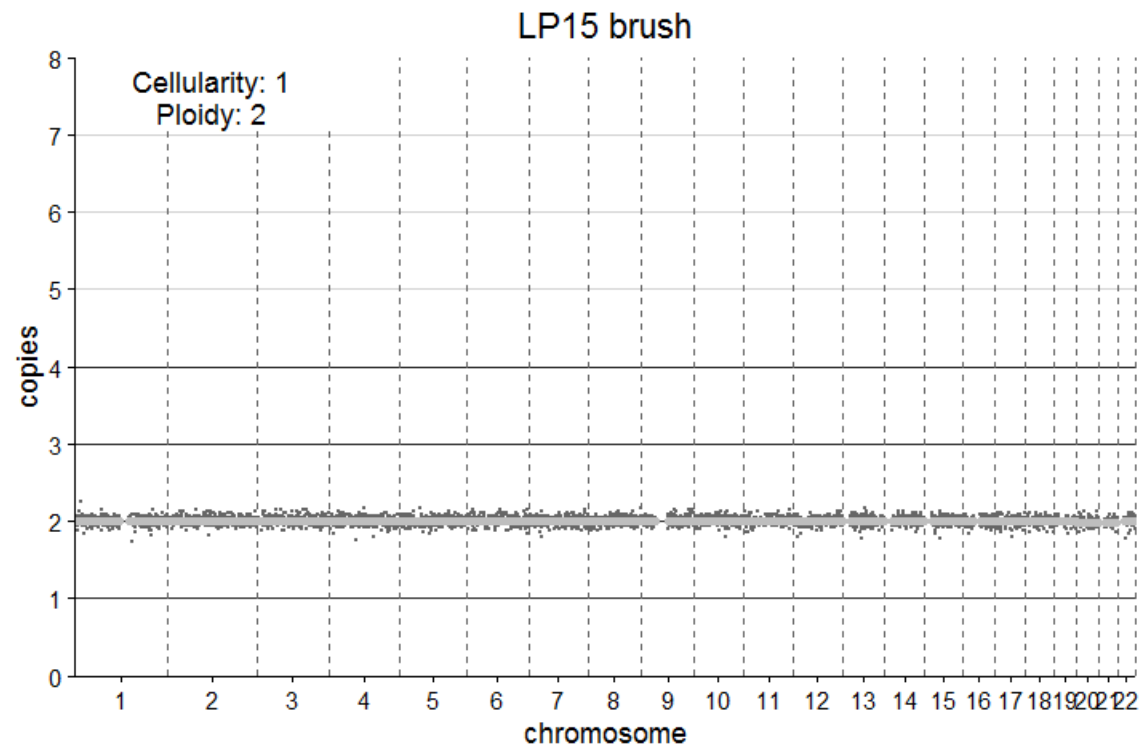

| Sample      | Coverage |      |     |
|-------------|----------|------|-----|
|             | Mean     | Max  | Min |
| LP15-biopsy | 537      | 1205 | 125 |
| LP15-brush  | 784      | 1491 | 225 |

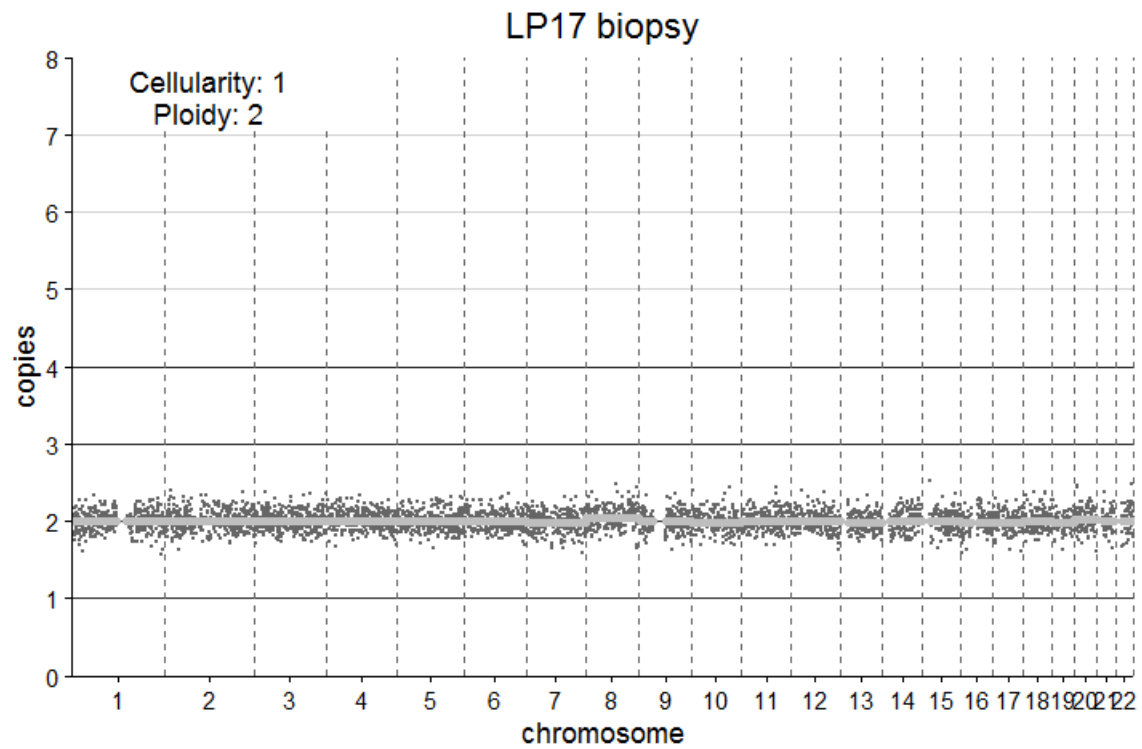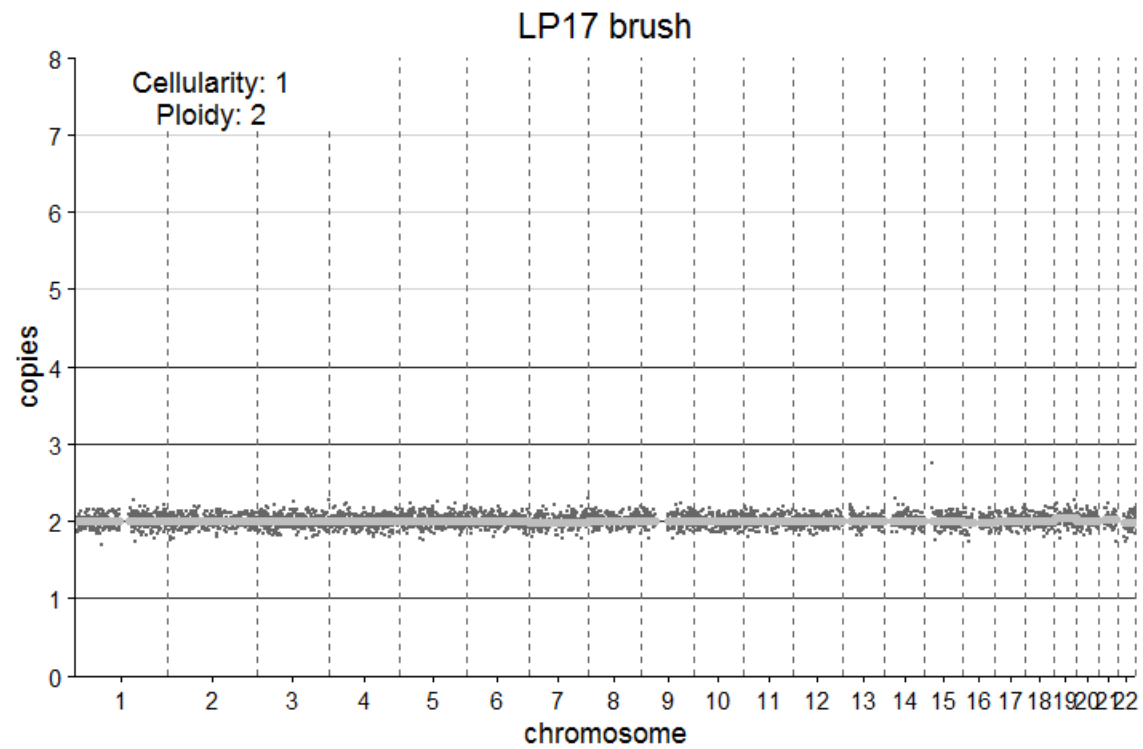

| Sample      | Coverage |      |     |
|-------------|----------|------|-----|
|             | Mean     | Max  | Min |
| LP17-biopsy | 906      | 2537 | 165 |
| LP17-brush  | 548      | 1454 | 150 |



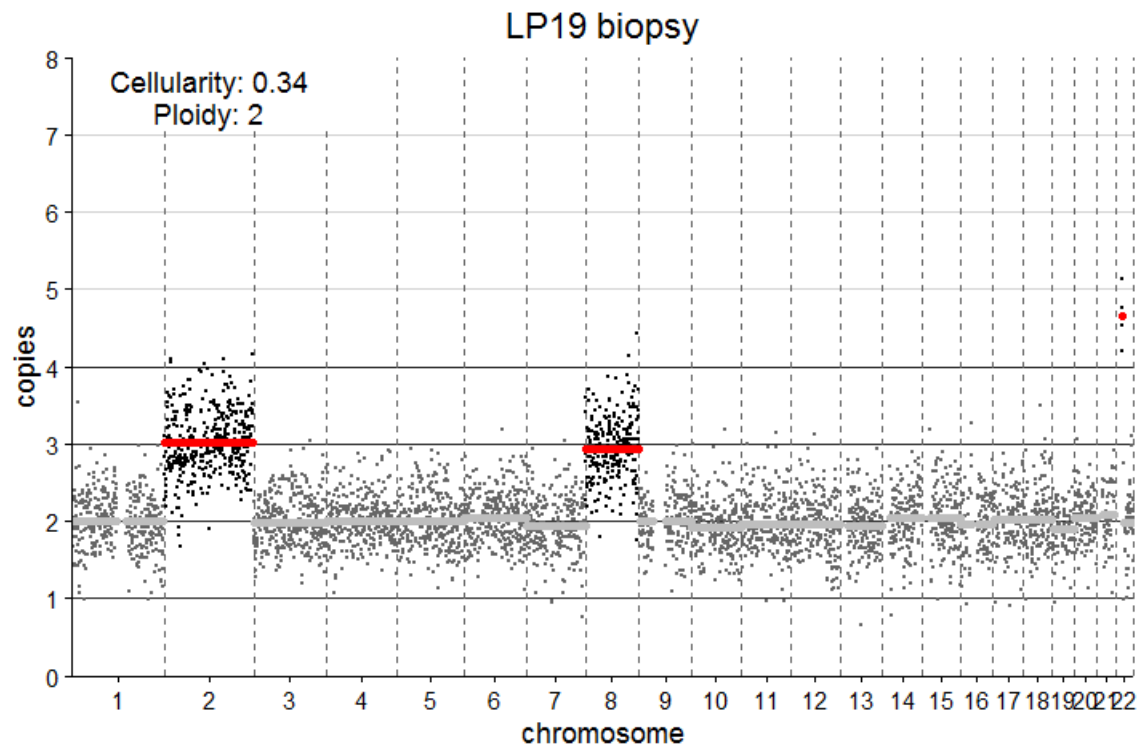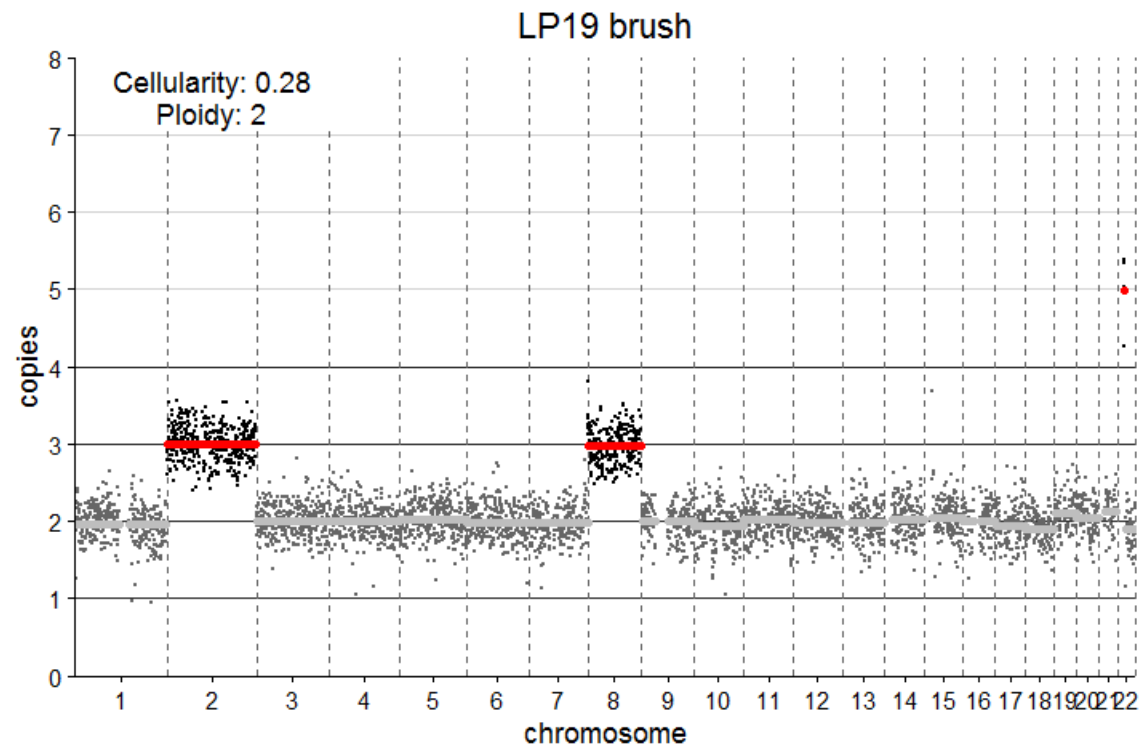

| Sample      | Chr   | Pos       | Gene | REF | ALT | read depth | ref reads | alt reads | VAF (%) | Change      | Coverage    |      |      |     |
|-------------|-------|-----------|------|-----|-----|------------|-----------|-----------|---------|-------------|-------------|------|------|-----|
|             |       |           |      |     |     |            |           |           |         |             | Sample      | Mean | Max  | Min |
| LP19-biopsy | chr17 | 7577548   | TP53 | C   | T   | 894        | 742       | 152       | 17      | p.Gly245Ser | LP19-biopsy | 890  | 1739 | 193 |
| LP19-brush  | chr4  | 187532702 | FAT1 | CA  | C   | 851        | 804       | 46        | 5       | p.Phe3230fs | LP19-brush  | 850  | 1594 | 223 |
| LP19-brush  | chr17 | 7577548   | TP53 | C   | T   | 906        | 783       | 122       | 13      | p.Gly245Ser | LP19-brush  | 850  | 1594 | 223 |

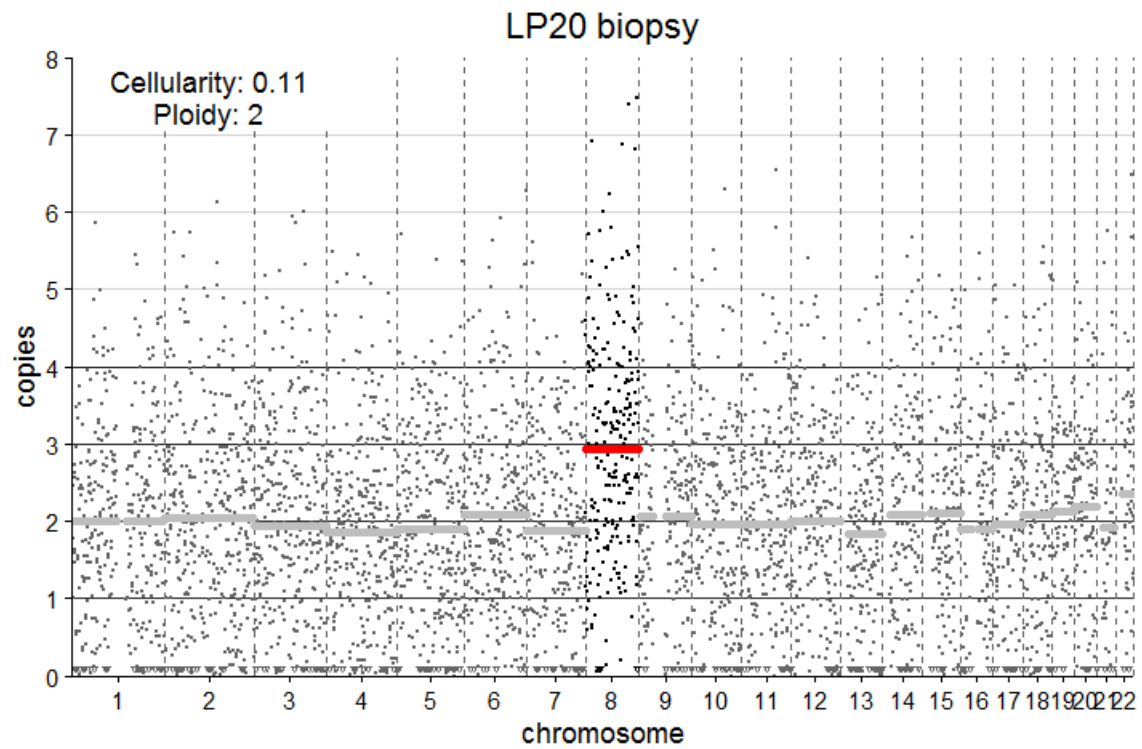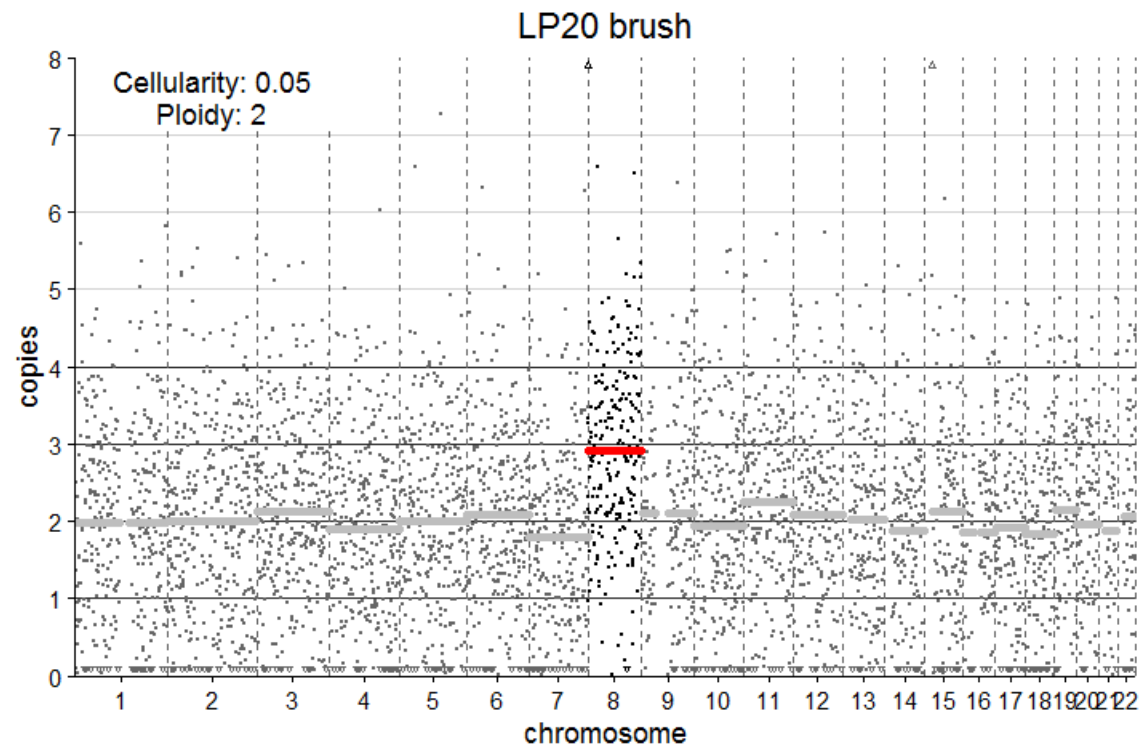

| Sample      | Coverage |      |     |
|-------------|----------|------|-----|
|             | Mean     | Max  | Min |
| LP20-biopsy | 1786     | 4333 | 284 |
| LP20-brush  | 843      | 1832 | 224 |

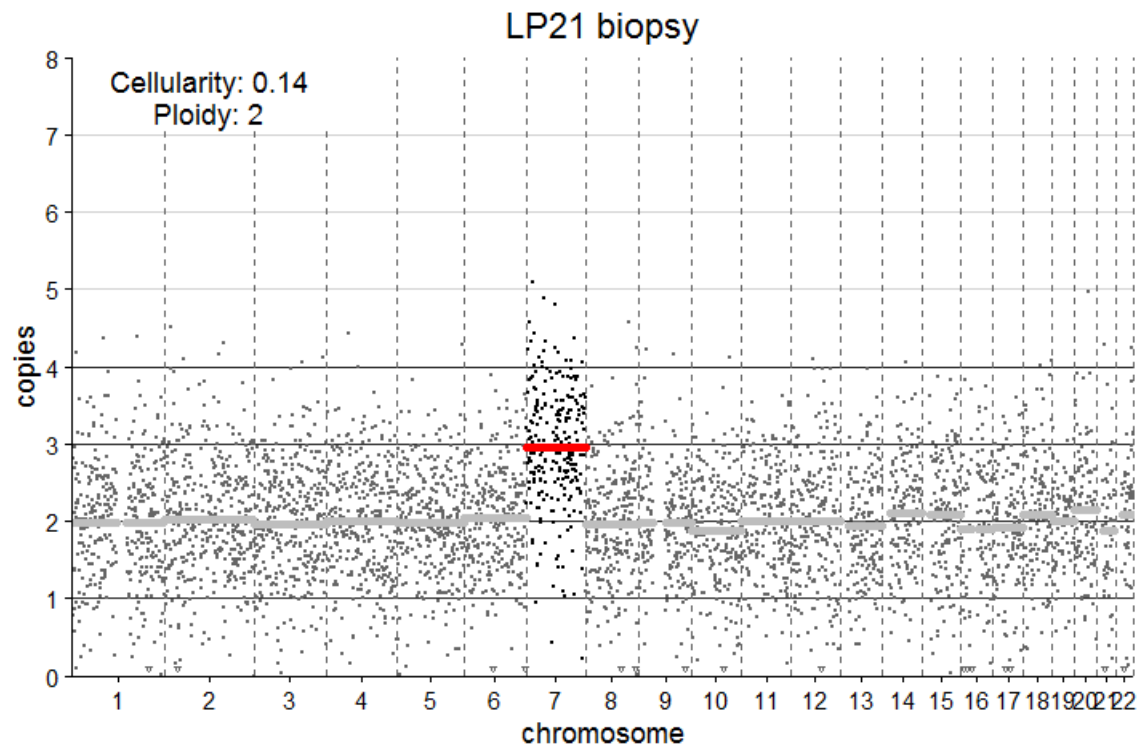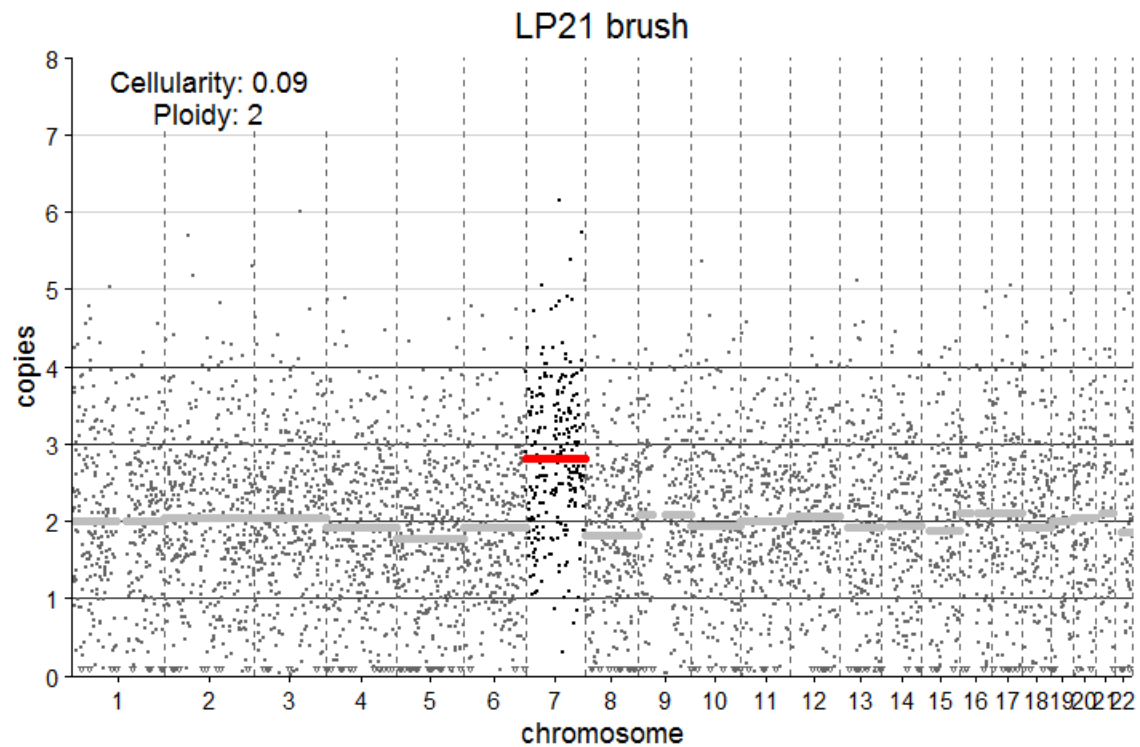

| Sample     | Chr  | Pos       | Gene   | REF | ALT | read depth | ref reads | alt reads | VAF (%) | Change      | Coverage    |      |      |     |
|------------|------|-----------|--------|-----|-----|------------|-----------|-----------|---------|-------------|-------------|------|------|-----|
|            |      |           |        |     |     |            |           |           |         |             | Sample      | Mean | Max  | Min |
| LP21-brush | chr9 | 139390823 | NOTCH1 | AAT | A   | 366        | 331       | 35        | 9.6     | p.Ile2456fs | LP21-biopsy | 1863 | 3849 | 298 |
| LP21-brush | chr9 | 139412297 | NOTCH1 | C   | T   | 378        | 341       | 37        | 9.8     | p.Glu450Lys | LP21-brush  | 387  | 1001 | 89  |

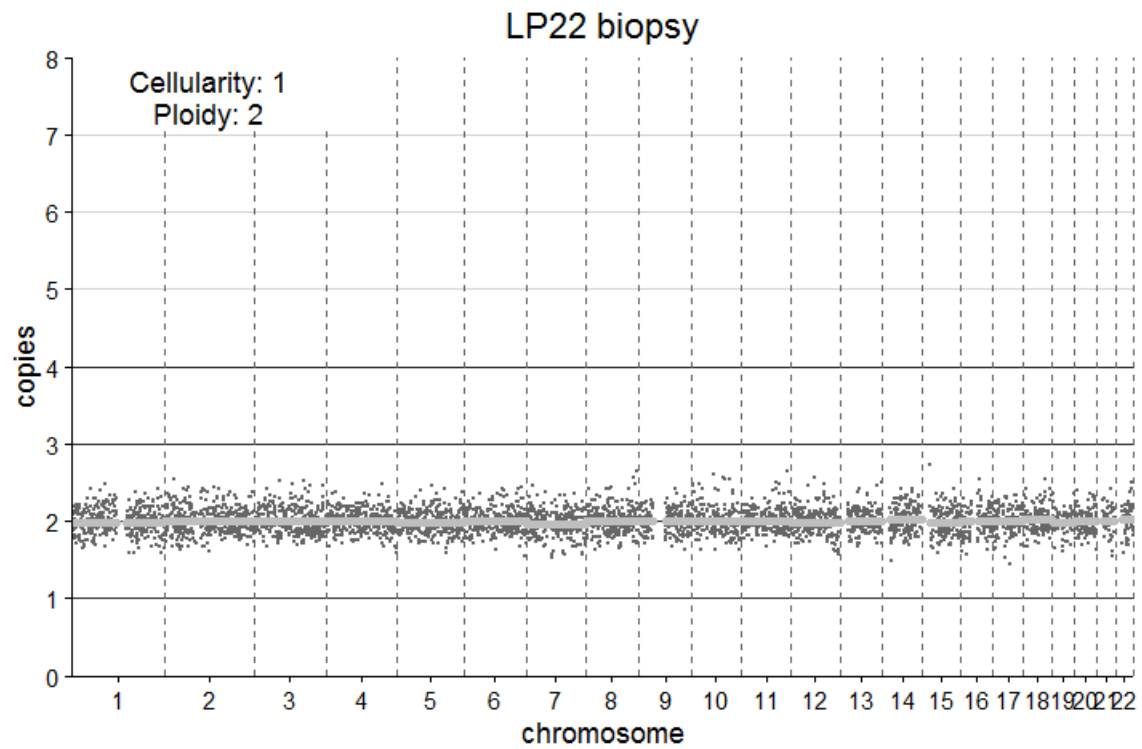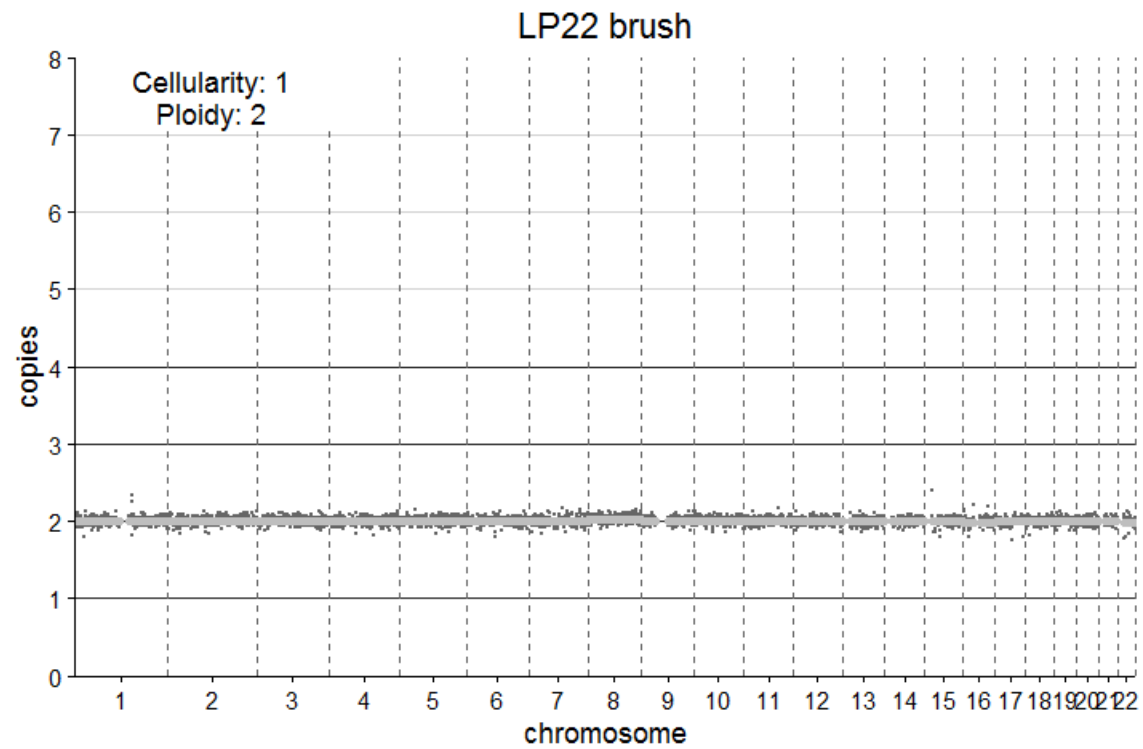

| Sample      | Coverage |      |     |
|-------------|----------|------|-----|
|             | Mean     | Max  | Min |
| LP22-biopsy | 559      | 1133 | 162 |
| LP22-brush  | 1622     | 2432 | 314 |

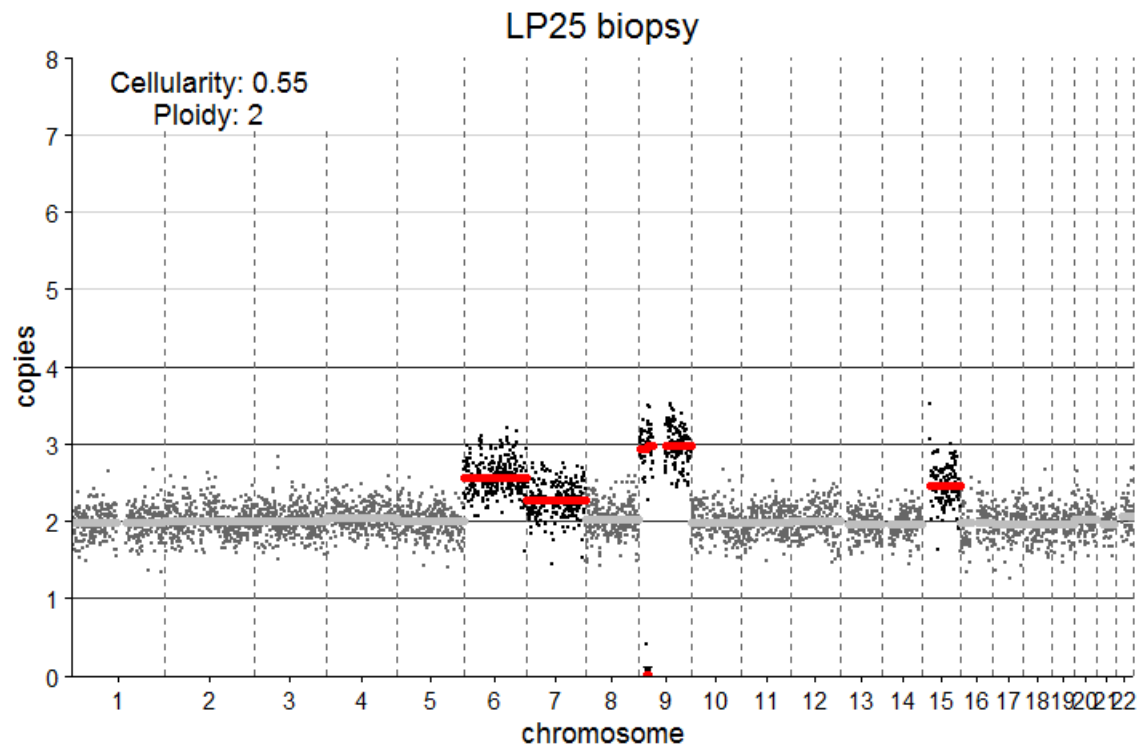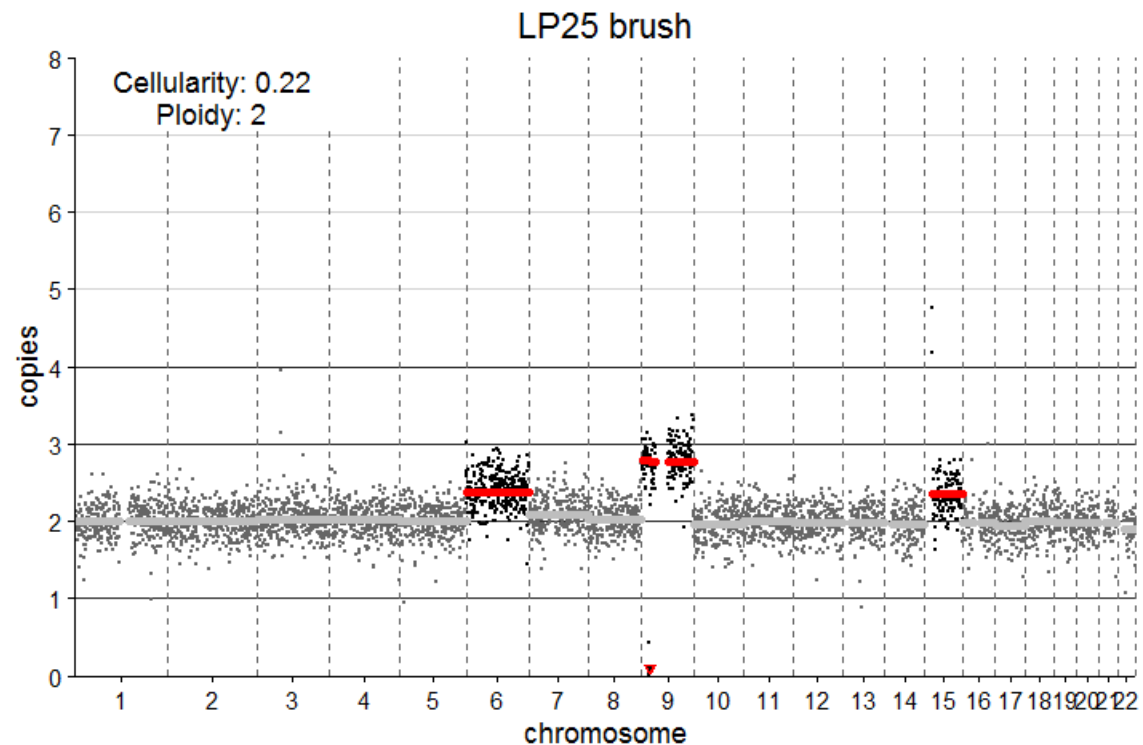

| Sample      | Chr   | Pos       | Gene   | REF  | ALT | read depth | ref reads | alt reads | VAF (%) | Change      | Coverage    |      |      |     |
|-------------|-------|-----------|--------|------|-----|------------|-----------|-----------|---------|-------------|-------------|------|------|-----|
|             |       |           |        |      |     |            |           |           |         |             | Sample      | Mean | Max  | Min |
| LP25-biopsy | chr2  | 202136259 | CASP8  | CAGA | C   | 671        | 519       | 151       | 22.54   | p.Glu170del |             |      |      |     |
| LP25-biopsy | chr4  | 187540425 | FAT1   | C    | CA  | 729        | 546       | 182       | 25      | p.Val2439fs | LP25-biopsy | 1065 | 2139 | 202 |
| LP25-biopsy | chr4  | 187542304 | FAT1   | AAC  | A   | 761        | 583       | 178       | 23.39   | p.Val1812fs |             |      |      |     |
| LP25-biopsy | chr9  | 139417472 | NOTCH1 | T    | C   | 1808       | 1449      | 359       | 20      | p.His191Arg | LP25-brush  | 1716 | 3147 | 328 |
| LP25-biopsy | chr11 | 534289    | HRAS   | C    | T   | 1361       | 972       | 389       | 29      | p.Gly12Ser  |             |      |      |     |
| LP25-brush  | chr9  | 202136259 | CASP8  | CAGA | C   | 1675       | 1524      | 150       | 9.0     | p.Glu170del |             |      |      |     |
| LP25-brush  | chr11 | 187540425 | FAT1   | C    | CA  | 1820       | 1623      | 193       | 10.6    | p.Val2439fs |             |      |      |     |
| LP25-brush  | chr2  | 187542304 | FAT1   | AAC  | A   | 1794       | 1587      | 208       | 11.6    | p.Val1812fs |             |      |      |     |
| LP25-brush  | chr9  | 139417472 | NOTCH1 | T    | C   | 1804       | 1642      | 160       | 9       | p.His191Arg |             |      |      |     |
| LP25-brush  | chr11 | 534289    | HRAS   | C    | T   | 1492       | 1352      | 138       | 9       | p.Gly12Ser  |             |      |      |     |

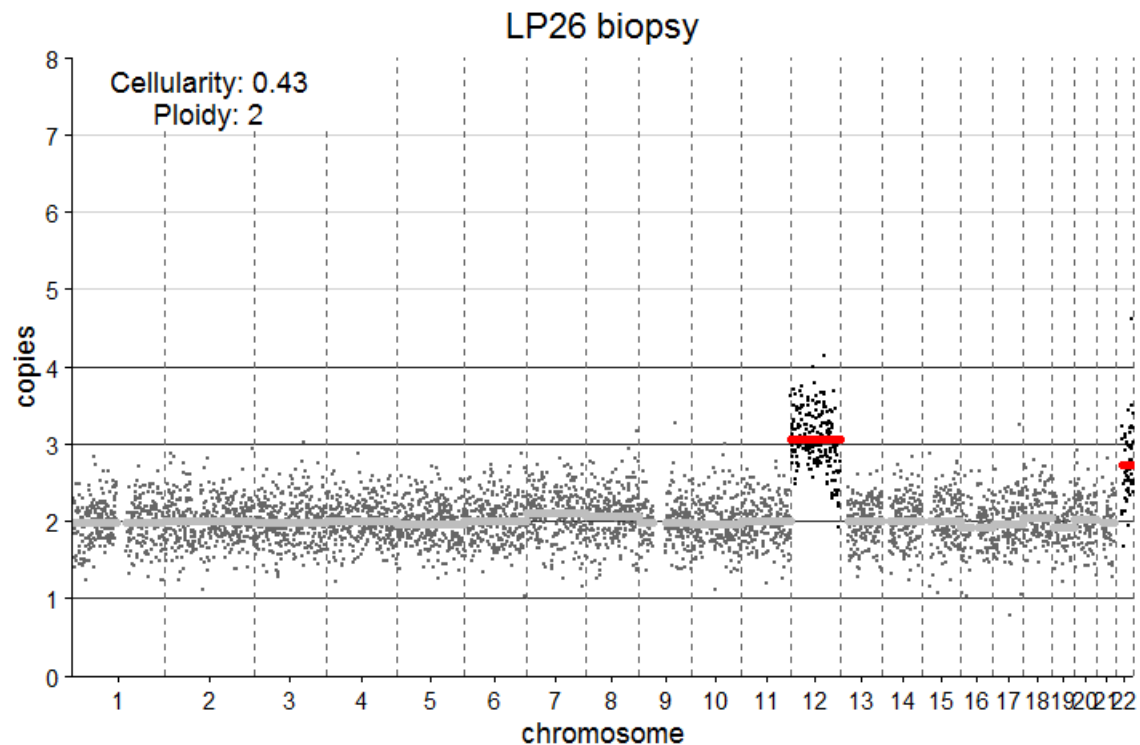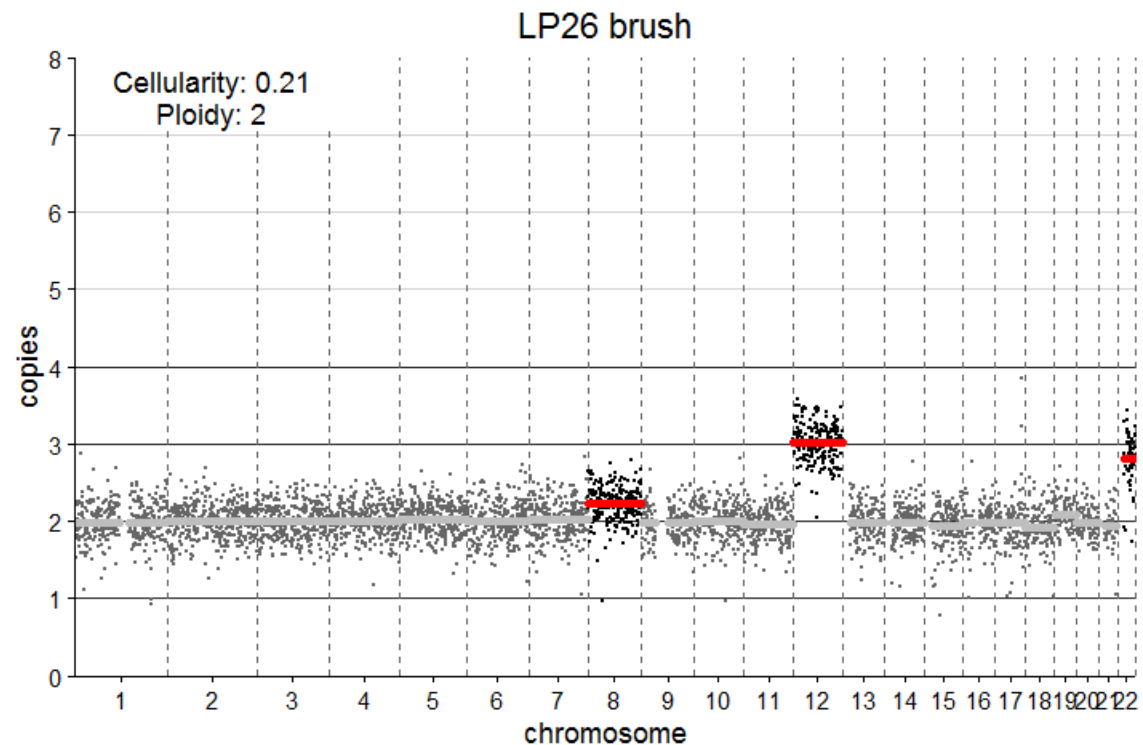

| Sample      | Chr   | Pos       | Gene   | REF  | ALT | read depth | ref reads | alt reads | VAF (%) | Change             | Coverage    |      |      |     |
|-------------|-------|-----------|--------|------|-----|------------|-----------|-----------|---------|--------------------|-------------|------|------|-----|
|             |       |           |        |      |     |            |           |           |         |                    | Sample      | Mean | Max  | Min |
| LP26-biopsy | chr3  | 178936091 | PIK3CA | G    | A   | 661        | 527       | 133       | 20      | p.Glu545Lys        |             |      |      |     |
| LP26-biopsy | chr9  | 21968242  | CDKN2A | C    | T   | 772        | 398       | 374       | 48      | .                  | LP26-biopsy | 1614 | 4317 | 264 |
| LP26-biopsy | chr9  | 139410521 | NOTCH1 | G    | C   | 1041       | 971       | 69        | 6.6     | p.Tyr527*          |             |      |      |     |
| LP26-biopsy | chr9  | 139412303 | NOTCH1 | G    | A   | 1493       | 1060      | 431       | 29      | p.Arg448*          | LP26-brush  | 2914 | 5062 | 585 |
| LP26-biopsy | chr17 | 7578452   | TP53   | T..C | T   | 1762       | 1535      | 227       | 13      | p.Val157_Ala159del |             |      |      |     |
| LP26-brush  | chr3  | 178936091 | PIK3CA | G    | A   | 1807       | 1623      | 184       | 10      | p.Glu545Lys        |             |      |      |     |
| LP26-brush  | chr9  | 21968242  | CDKN2A | C    | T   | 1914       | 1456      | 458       | 24      | .                  |             |      |      |     |
| LP26-brush  | chr9  | 139410521 | NOTCH1 | G    | C   | 1657       | 1490      | 165       | 10      | p.Tyr527*          |             |      |      |     |
| LP26-brush  | chr9  | 139412303 | NOTCH1 | G    | A   | 2174       | 1907      | 267       | 12      | p.Arg448*          |             |      |      |     |
| LP26-brush  | chr17 | 7578452   | TP53   | T..C | T   | 2838       | 2547      | 290       | 10      | p.Val157_Ala159del |             |      |      |     |

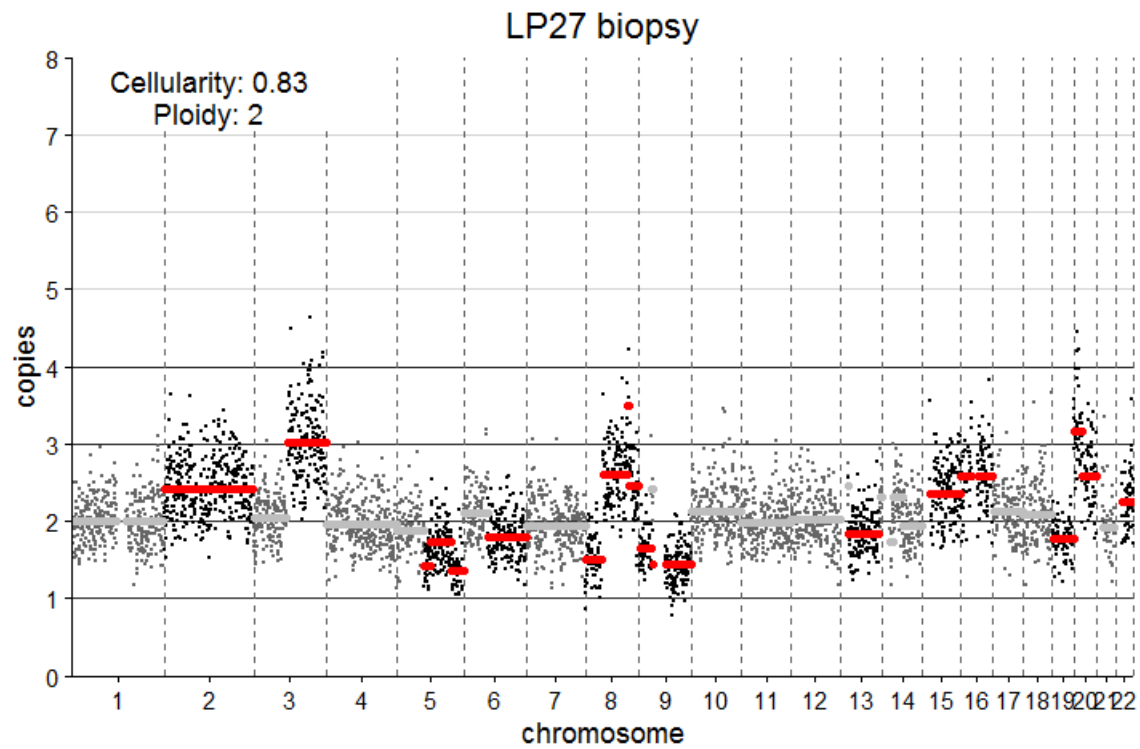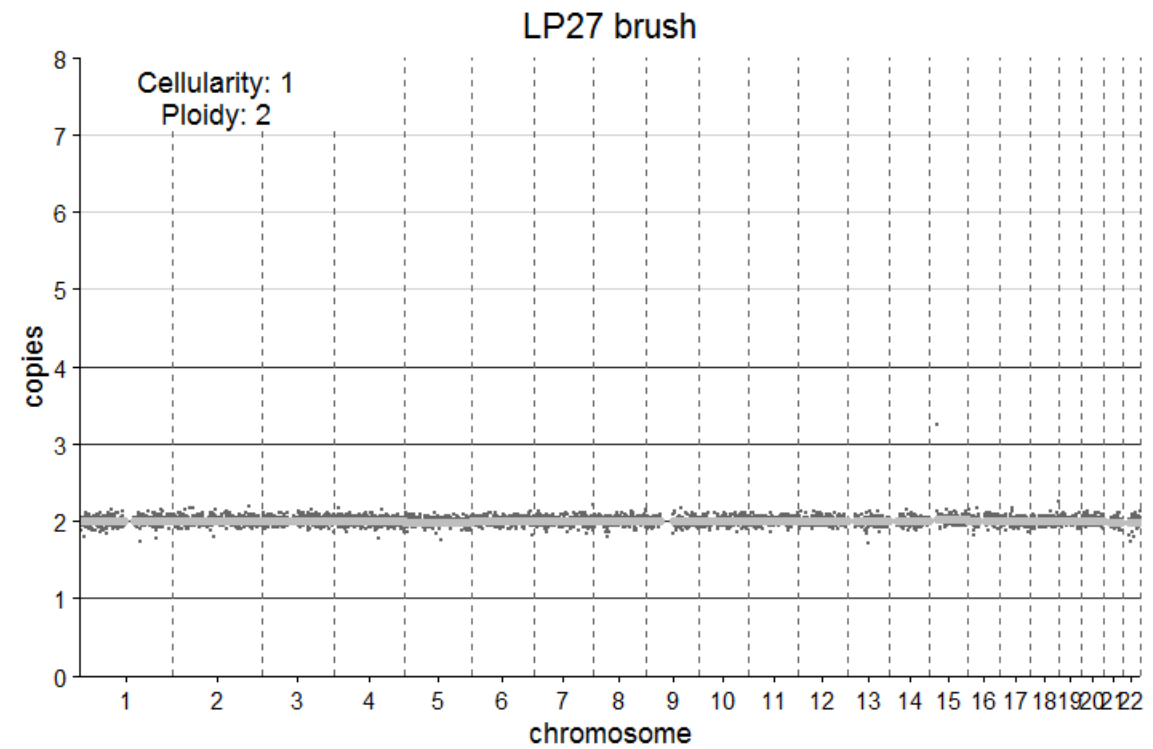

| Sample      | Chr   | Pos       | Gene | REF | ALT | read depth | ref reads | alt reads | VAF (%) | Change      | Coverage    |      |      |     |
|-------------|-------|-----------|------|-----|-----|------------|-----------|-----------|---------|-------------|-------------|------|------|-----|
|             |       |           |      |     |     |            |           |           |         |             | Sample      | Mean | Max  | Min |
| LP27-biopsy | chr4  | 187584747 | FAT1 | G   | A   | 392        | 363       | 28        | 7.2     | p.Arg1096*  |             |      |      |     |
| LP27-biopsy | chr17 | 7577081   | TP53 | T   | G   | 674        | 122       | 552       | 82      | p.Glu286Ala | LP27-biopsy | 535  | 1158 | 83  |
| LP27-brush  | chr17 | 7577081   | TP53 | T   | G   | 970        | 936       | 34        | 3.5     | p.Glu286Ala | LP27-brush  | 1159 | 2681 | 367 |

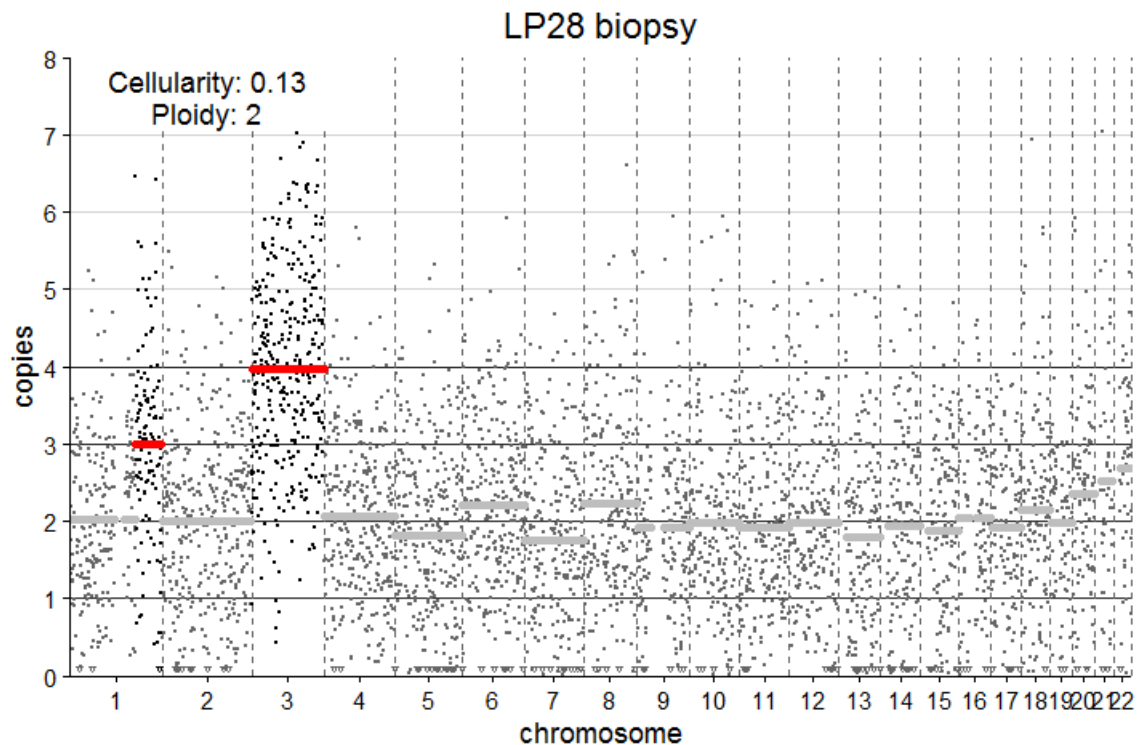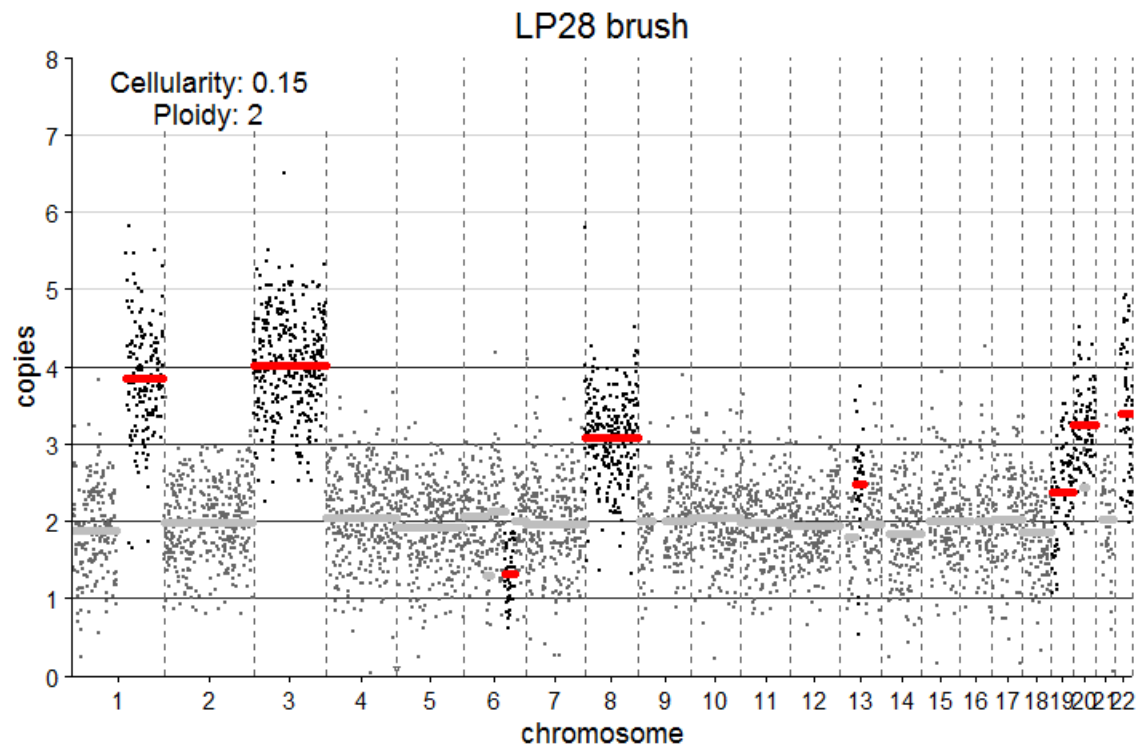

| Sample     | Chr   | Pos       | Gene   | REF | ALT | read depth | ref reads | alt reads | VAF (%) | Change      | Coverage    |      |      |     |
|------------|-------|-----------|--------|-----|-----|------------|-----------|-----------|---------|-------------|-------------|------|------|-----|
|            |       |           |        |     |     |            |           |           |         |             | Sample      | Mean | Max  | Min |
| LP28-brush | chr4  | 187525711 | FAT1   | GC  | G   | 643        | 595       | 48        | 7.5     | p.Gly3456fs | LP28-biopsy | 171  | 1158 | 6   |
| LP28-brush | chr9  | 139413214 | NOTCH1 | C   | T   | 788        | 750       | 38        | 4.8     | p.Gly310Arg | LP28-brush  | 787  | 1836 | 170 |
| LP28-brush | chr17 | 7578260   | TP53   | C   | T   | 800        | 763       | 37        | 4.6     | p.Val197Met |             |      |      |     |
| LP28-brush | chr17 | 7578271   | TP53   | T   | C   | 792        | 772       | 20        | 2.5     | p.His193Arg |             |      |      |     |



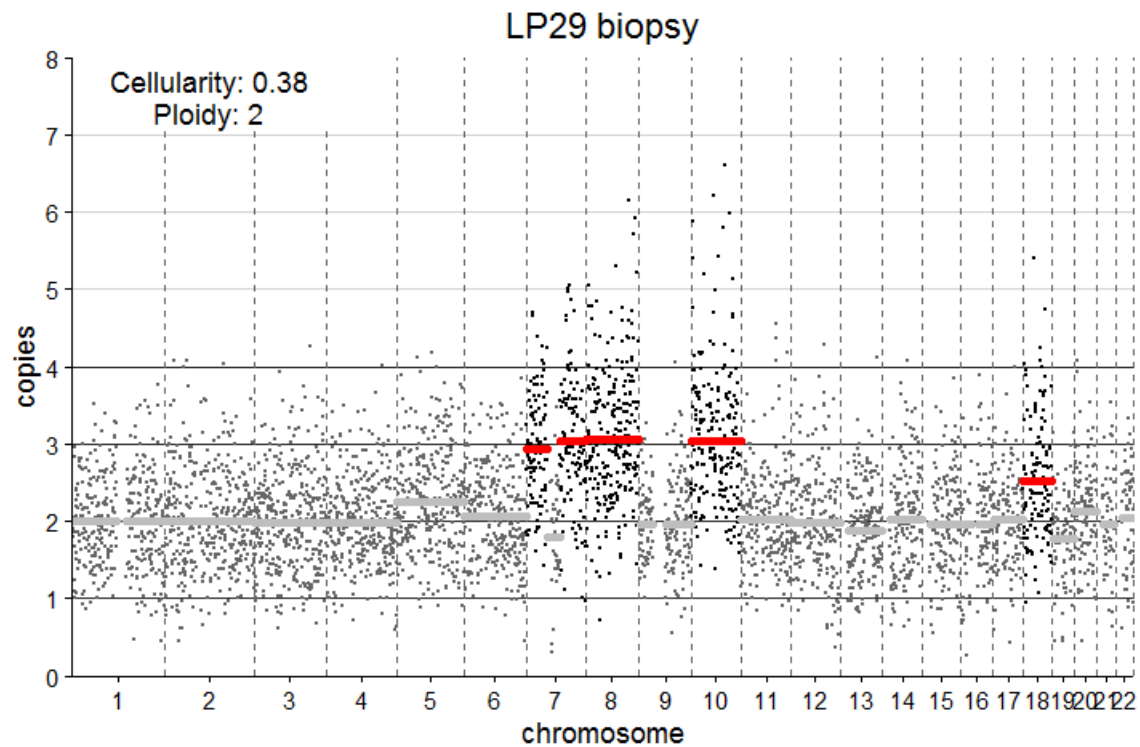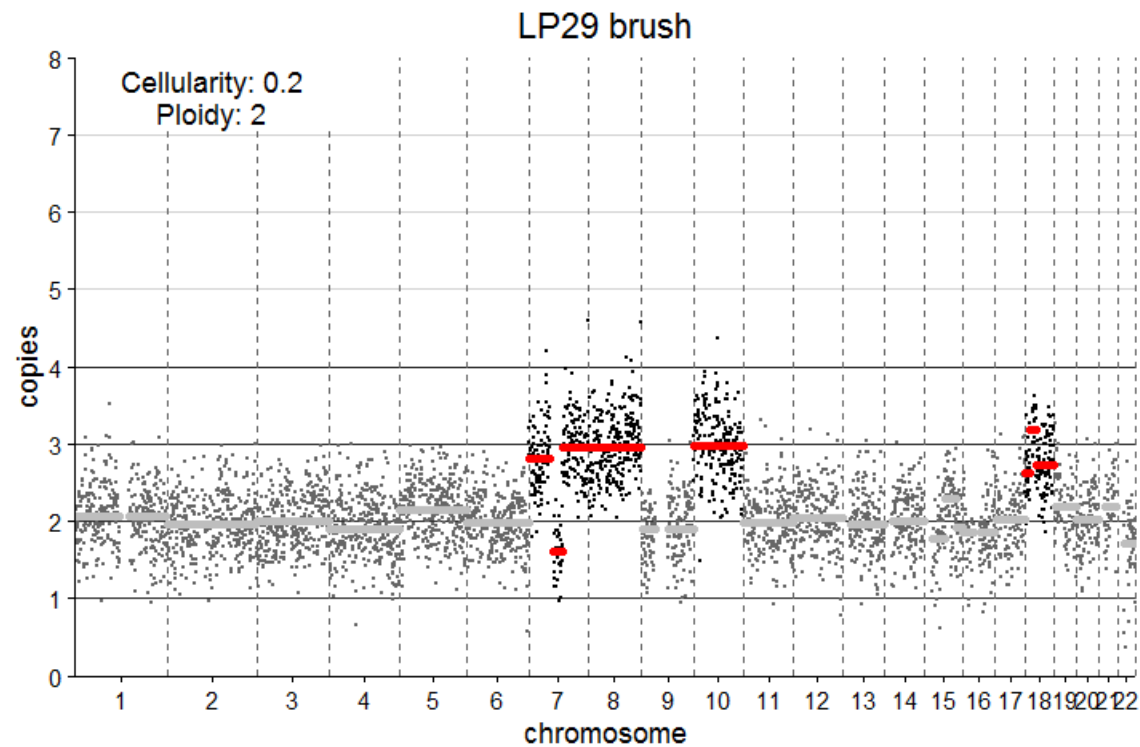

| Sample      | Chr   | Pos       | Gene   | REF | ALT | read depth | ref reads | alt reads | VAF (%) | Change       | Coverage    |      |      |     |
|-------------|-------|-----------|--------|-----|-----|------------|-----------|-----------|---------|--------------|-------------|------|------|-----|
|             |       |           |        |     |     |            |           |           |         |              | Sample      | Mean | Max  | Min |
| LP29-biopsy | chr3  | 178952085 | PIK3CA | A   | T   | 51         | 38        | 13        | 25.49   | p.His1047Leu |             |      |      |     |
| LP29-biopsy | chr12 | 49446102  | KMT2D  | T   | G   | 136        | 127       | 9         | 6.62    | p.Glu455Ala  | LP29-biopsy | 105  | 539  | 5   |
| LP29-brush  | chr3  | 178952085 | PIK3CA | A   | T   | 1876       | 1703      | 173       | 9.2     | p.His1047Leu | LP29-brush  | 2644 | 3604 | 342 |

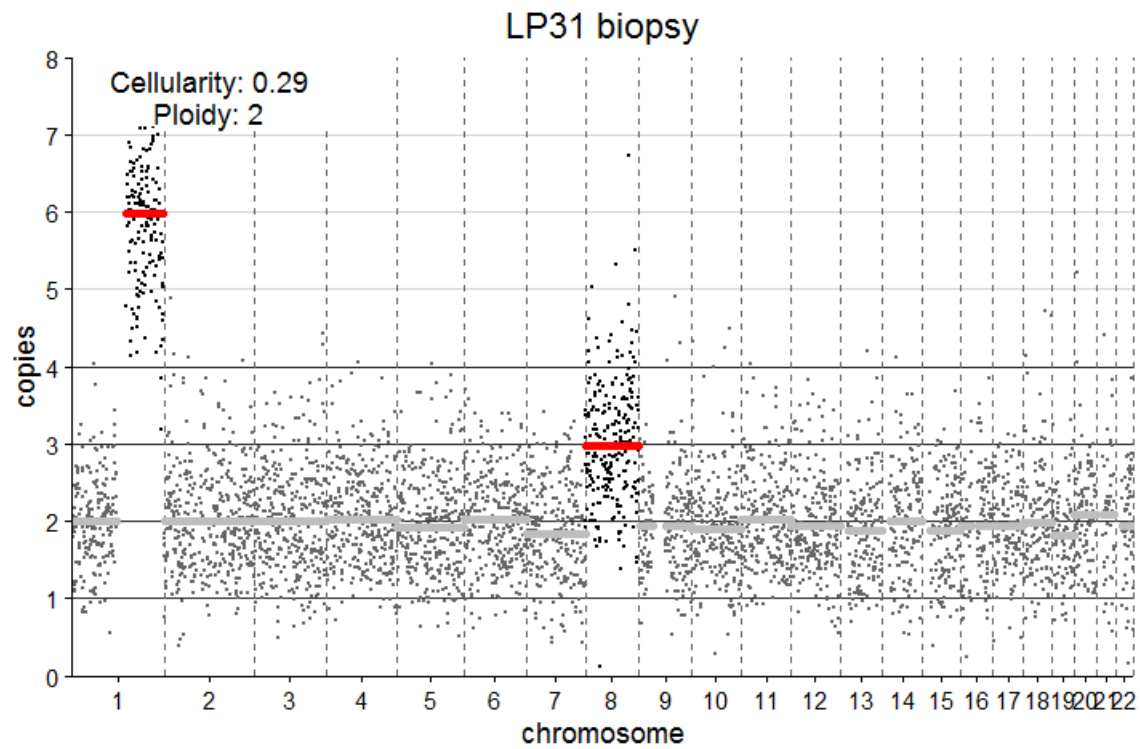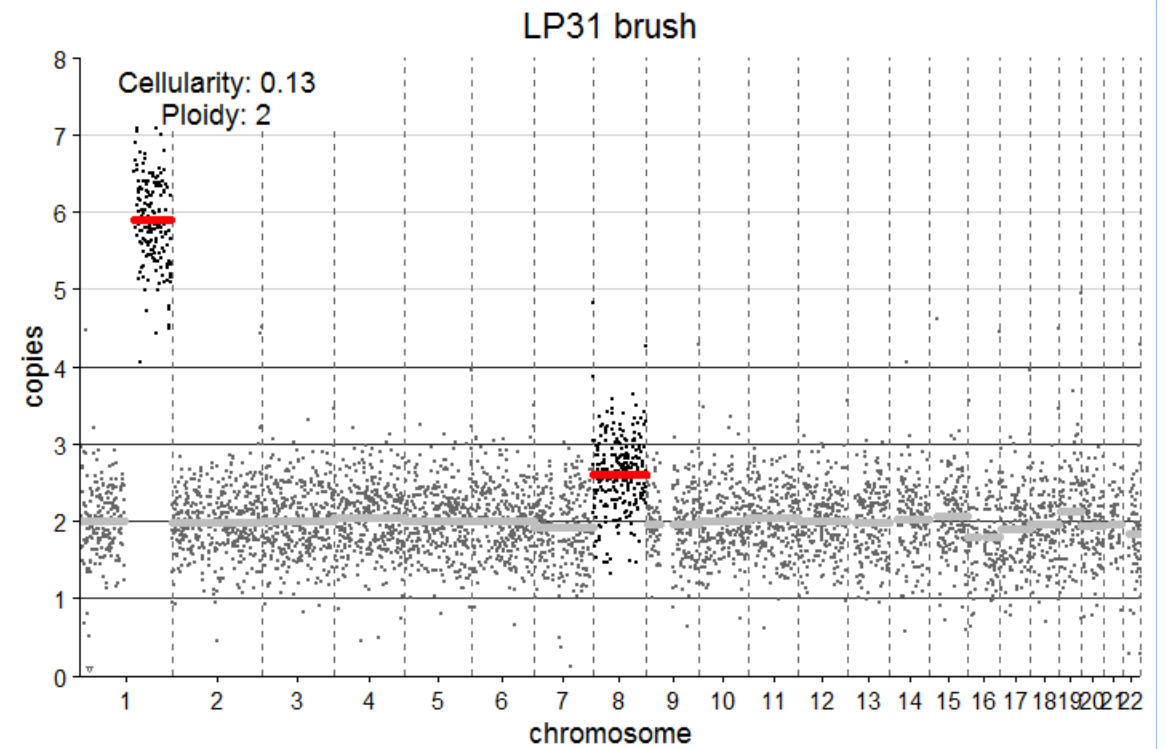

| Sample      | Chr   | Pos       | Gene   | REF | ALT | read depth | ref reads | alt reads | VAF (%) | Change       | Coverage    |      |      |     |
|-------------|-------|-----------|--------|-----|-----|------------|-----------|-----------|---------|--------------|-------------|------|------|-----|
|             |       |           |        |     |     |            |           |           |         |              | Sample      | Mean | Max  | Min |
| LP31-biopsy | chr3  | 178952085 | PIK3CA | A   | G   | 79         | 64        | 15        | 18.99   | p.His1047Arg |             |      |      |     |
| LP31-biopsy | chr9  | 21971114  | CDKN2A | C   | T   | 115        | 78        | 37        | 32.17   | p.Val82Met   | LP31-biopsy | 133  | 630  | 12  |
| LP31-biopsy | chr17 | 7577587   | TP53   | T   | A   | 144        | 136       | 8         | 5.56    | p.Ile232Phe  |             |      |      |     |
| LP31-brush  | chr3  | 178952085 | PIK3CA | A   | G   | 3433       | 3297      | 136       | 4.0     | p.His1047Arg |             |      |      |     |
| LP31-brush  | chr9  | 21971114  | CDKN2A | C   | T   | 2596       | 2313      | 282       | 11      | p.Val82Met   |             |      |      |     |
| LP31-brush  | chr17 | 7577587   | TP53   | T   | A   | 3511       | 3377      | 133       | 3.8     | p.Ile232Phe  |             |      |      |     |
| LP31-brush  | chr17 | 7579313   | TP53   | G   | A   | 2588       | 2517      | 71        | 2.7     | p.Thr125Met  | LP31-brush  | 3436 | 4780 | 538 |

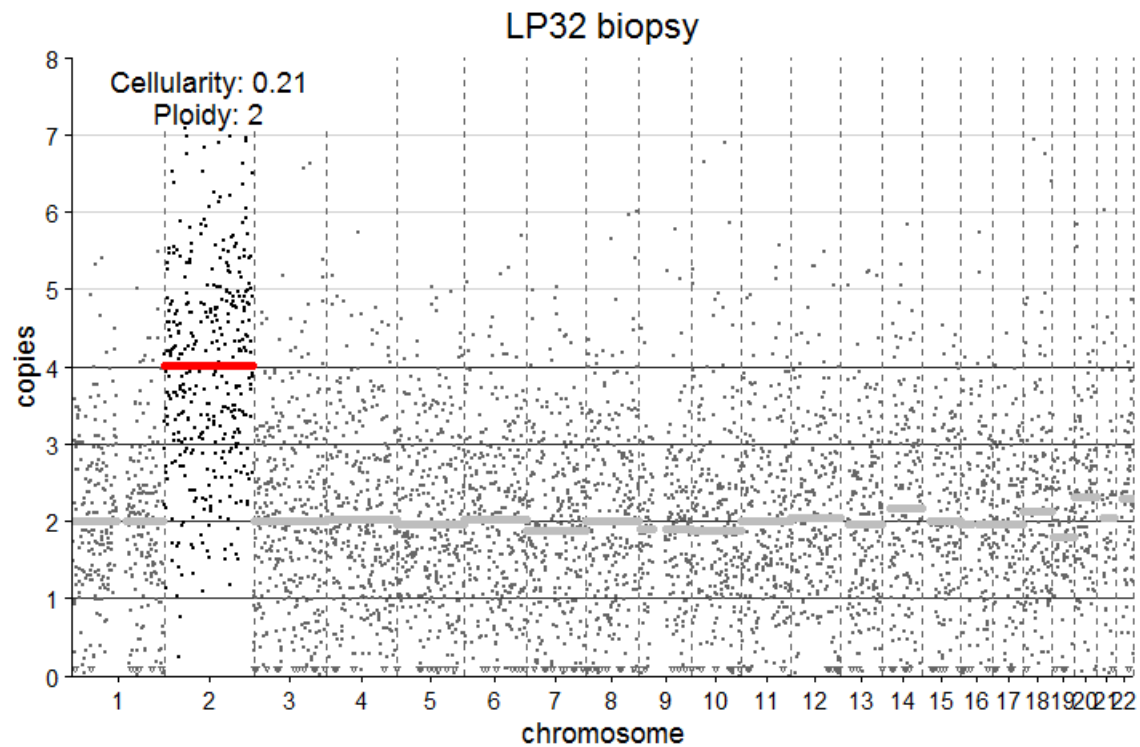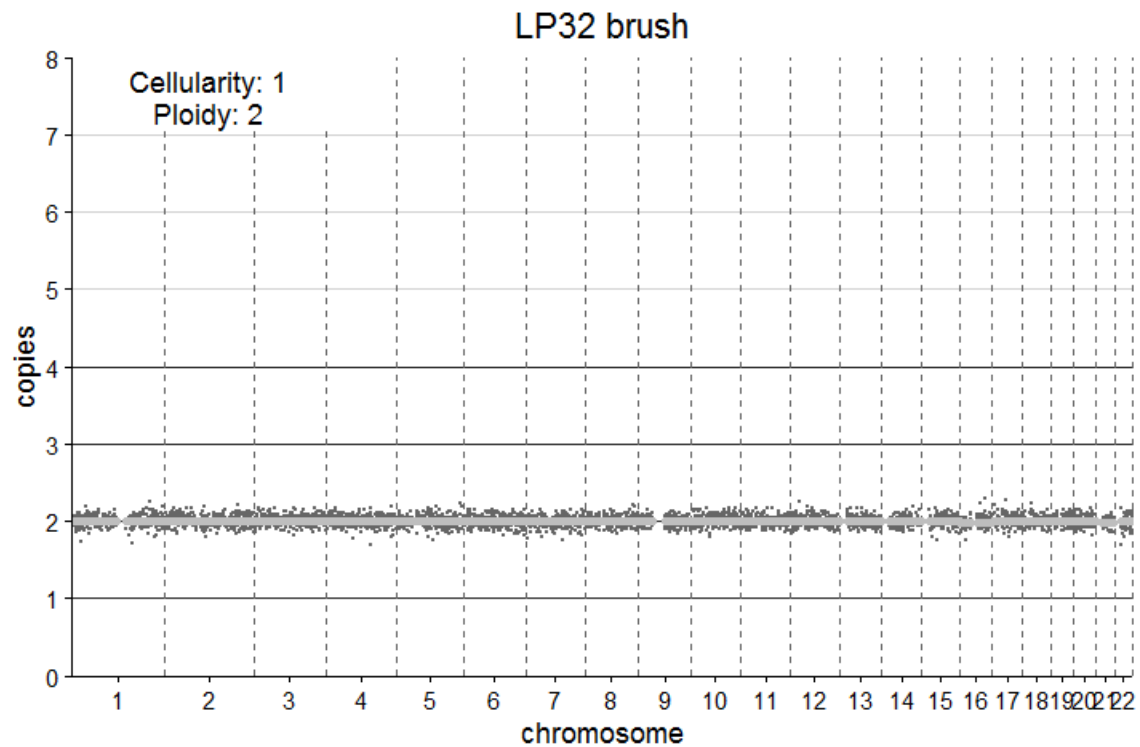

| Sample      | Chr   | Pos      | Gene  | REF | ALT | read depth | ref reads | alt reads | VAF (%) | Change      | Coverage    |      |      |     |
|-------------|-------|----------|-------|-----|-----|------------|-----------|-----------|---------|-------------|-------------|------|------|-----|
|             |       |          |       |     |     |            |           |           |         |             | Sample      | Mean | Max  | Min |
| LP32-biopsy | chr10 | 89720741 | PTEN  | C   | A   | 87         | 80        | 7         | 8.05    | p.Gln298Lys |             |      |      |     |
| LP32-biopsy | chr10 | 89720754 | PTEN  | G   | A   | 87         | 78        | 8         | 9.3     | p.Ser302Asn | LP32-biopsy | 102  | 484  | 9   |
| LP32-biopsy | chr12 | 49426019 | KMT2D | G   | A   | 93         | 87        | 5         | 5.43    | p.Gln4157*  |             |      |      |     |
| LP32-biopsy | chr12 | 49445146 | KMT2D | G   | C   | 113        | 107       | 6         | 5.31    | p.Pro774Ala | LP32-brush  | 3082 | 3954 | 411 |

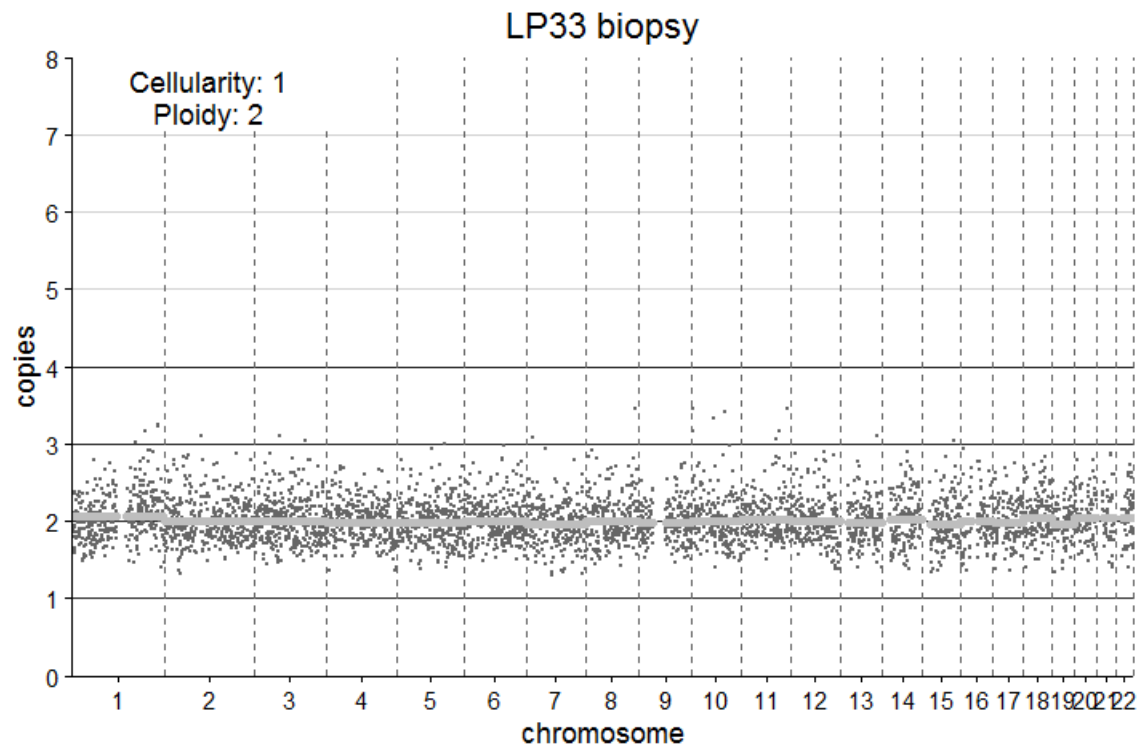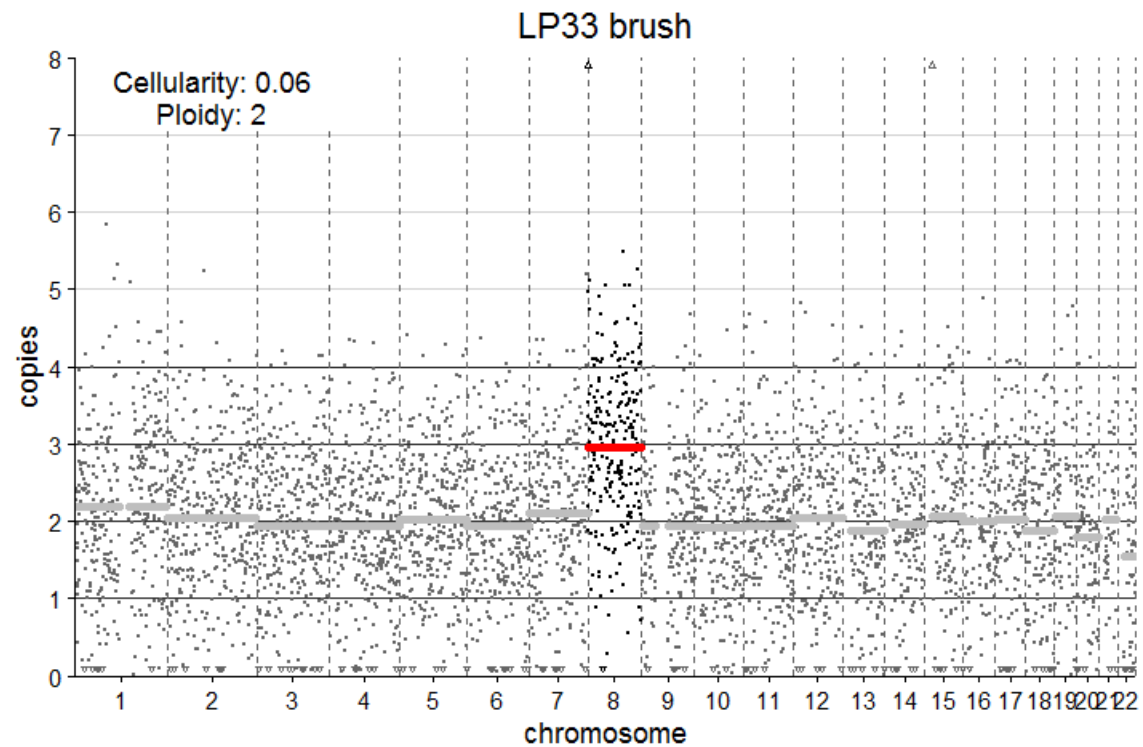

| Sample      | Chr   | Pos       | Gene   | REF | ALT | read depth | ref reads | alt reads | VAF (%) | Change       | Coverage    |      |      |     |
|-------------|-------|-----------|--------|-----|-----|------------|-----------|-----------|---------|--------------|-------------|------|------|-----|
|             |       |           |        |     |     |            |           |           |         |              | Sample      | Mean | Max  | Min |
| LP33-biopsy | chr3  | 178917603 | PIK3CA | C   | T   | 74         | 69        | 5         | 6.76    | p.His160Tyr  |             |      |      |     |
| LP33-biopsy | chr4  | 187560922 | FAT1   | G   | T   | 62         | 55        | 7         | 11.29   | p.Thr119Lys  | LP33-biopsy | 121  | 590  | 5   |
| LP33-biopsy | chr5  | 176639196 | NSD1   | G   | A   | 156        | 146       | 10        | 6.41    | p.Ala1266Thr |             |      |      |     |
| LP33-biopsy | chr9  | 139399952 | NOTCH1 | G   | A   | 104        | 98        | 6         | 5.77    | p.Gln1466*   | LP33-brush  | 1941 | 3341 | 413 |
| LP33-biopsy | chr17 | 7573945   | TP53   | C   | T   | 65         | 60        | 5         | 7.69    | p.Gly361Glu  |             |      |      |     |
| LP33-brush  | chr9  | 139412282 | NOTCH1 | C   | A   | 2042       | 1961      | 79        | 3.9     | p.Glu455*    |             |      |      |     |

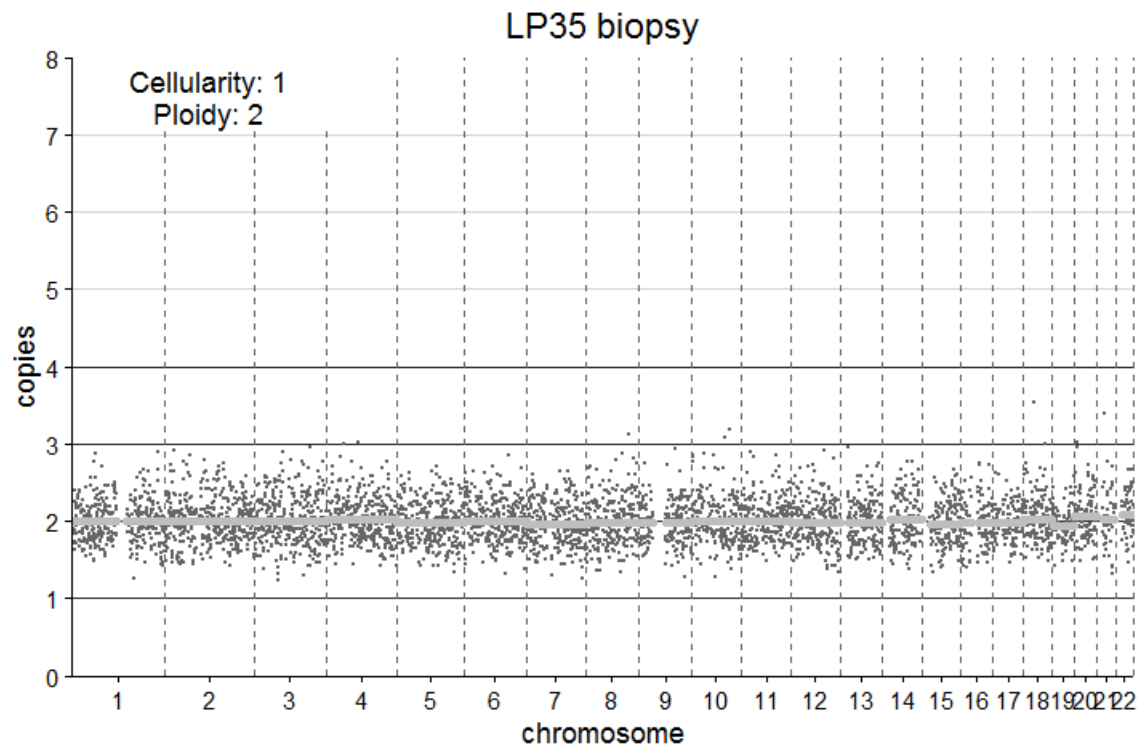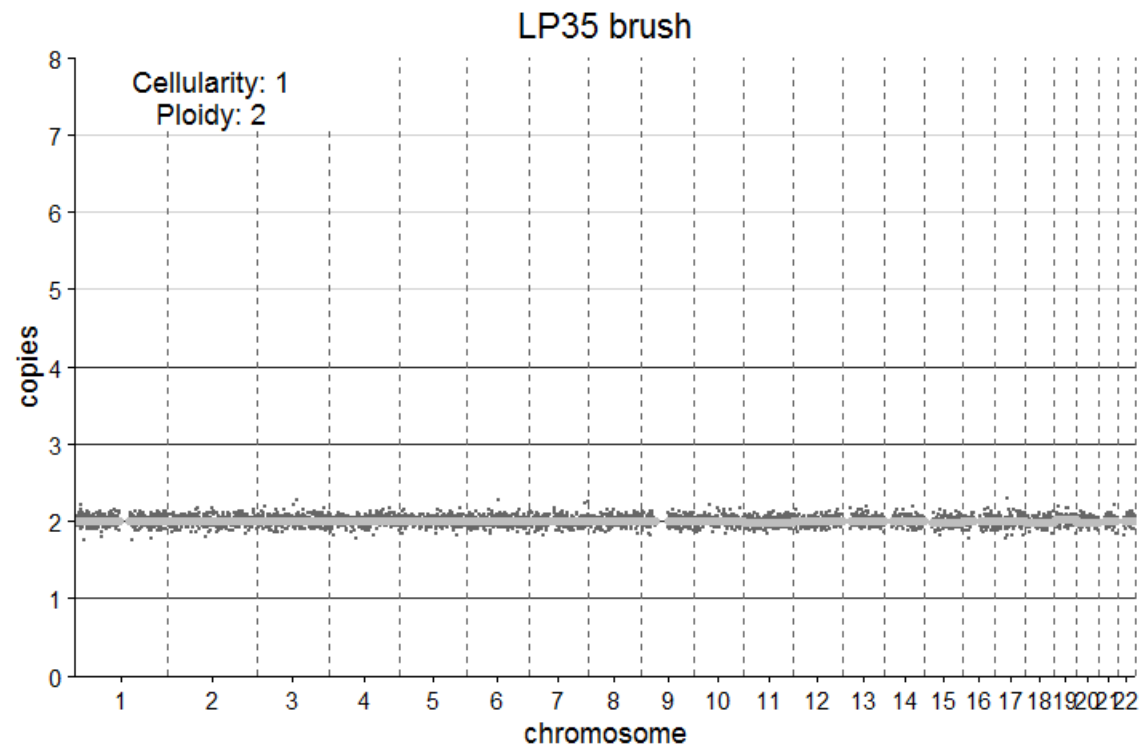

| Sample      | Coverage |      |     |
|-------------|----------|------|-----|
|             | Mean     | Max  | Min |
| LP35-biopsy | 201      | 586  | 7   |
| LP35-brush  | 1408     | 2437 | 320 |

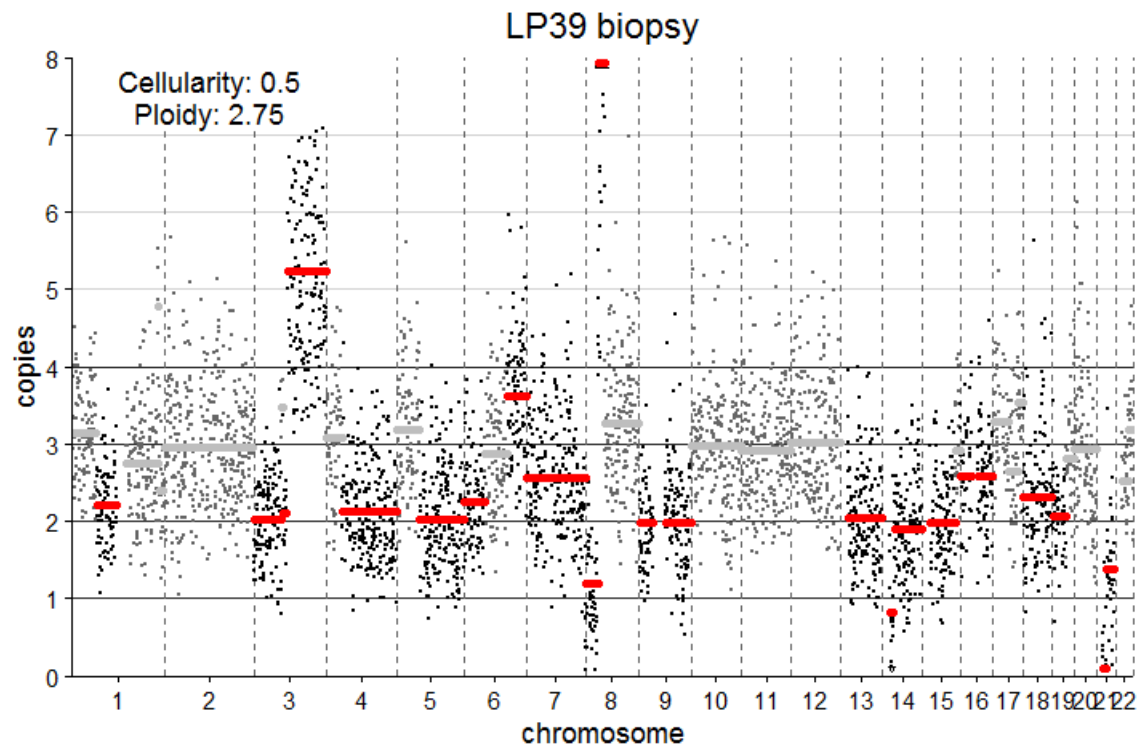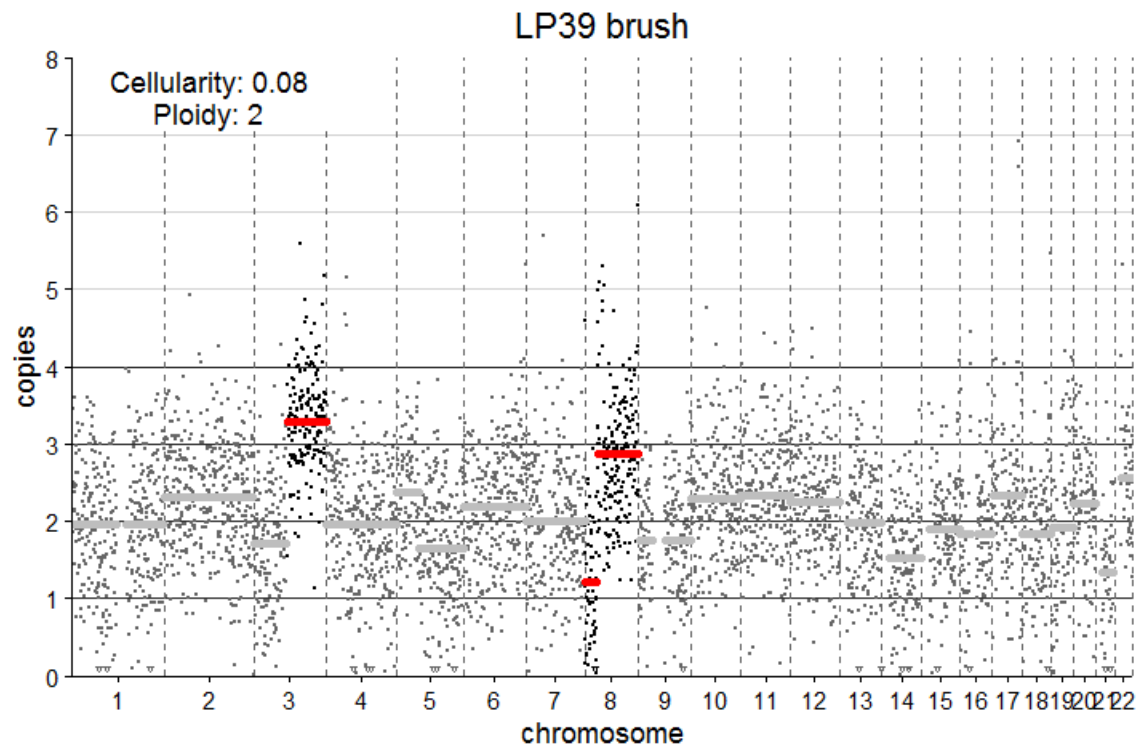

| Sample      | Chr   | Pos      | Gene   | REF  | ALT | read depth | ref reads | alt reads | VAF (%) | Change           | Coverage    |      |     |     |
|-------------|-------|----------|--------|------|-----|------------|-----------|-----------|---------|------------------|-------------|------|-----|-----|
|             |       |          |        |      |     |            |           |           |         |                  | Sample      | Mean | Max | Min |
| LP39-biopsy | chr9  | 21974726 | CDKN2A | G..A | G   | 230        | 143       | 87        | 37.83   | p.Val28_Glu33del | LP39-biopsy | 257  | 952 | 17  |
| LP39-biopsy | chr9  | 21968242 | CDKN2A | C    | T   | 226        | 76        | 150       | 66.37   | .                | LP39-biopsy | 257  | 952 | 17  |
| LP39-biopsy | chr17 | 7577509  | TP53   | C    | T   | 256        | 59        | 197       | 76.95   | p.Glu258Lys      | LP39-biopsy | 257  | 952 | 17  |
| LP39-brush  | chr12 | 49445392 | KMT2D  | G    | T   | 54         | 39        | 15        | 27.78   | p.Pro692Thr      | LP39-brush  | 62   | 154 | 1   |

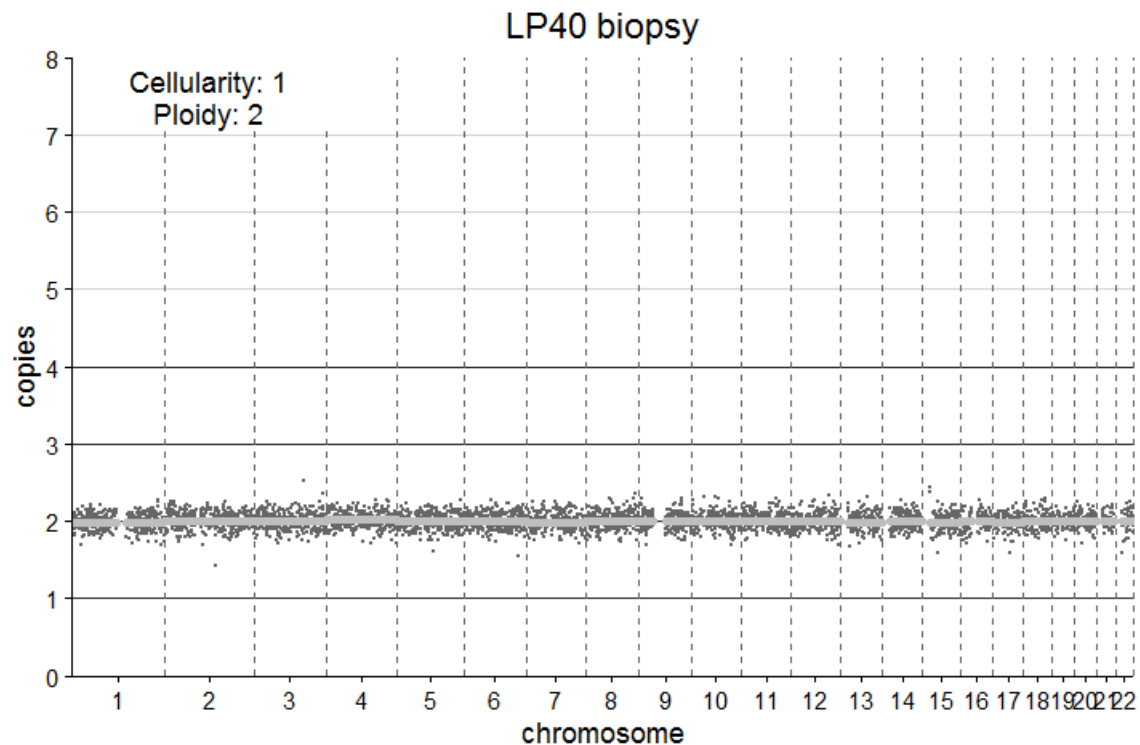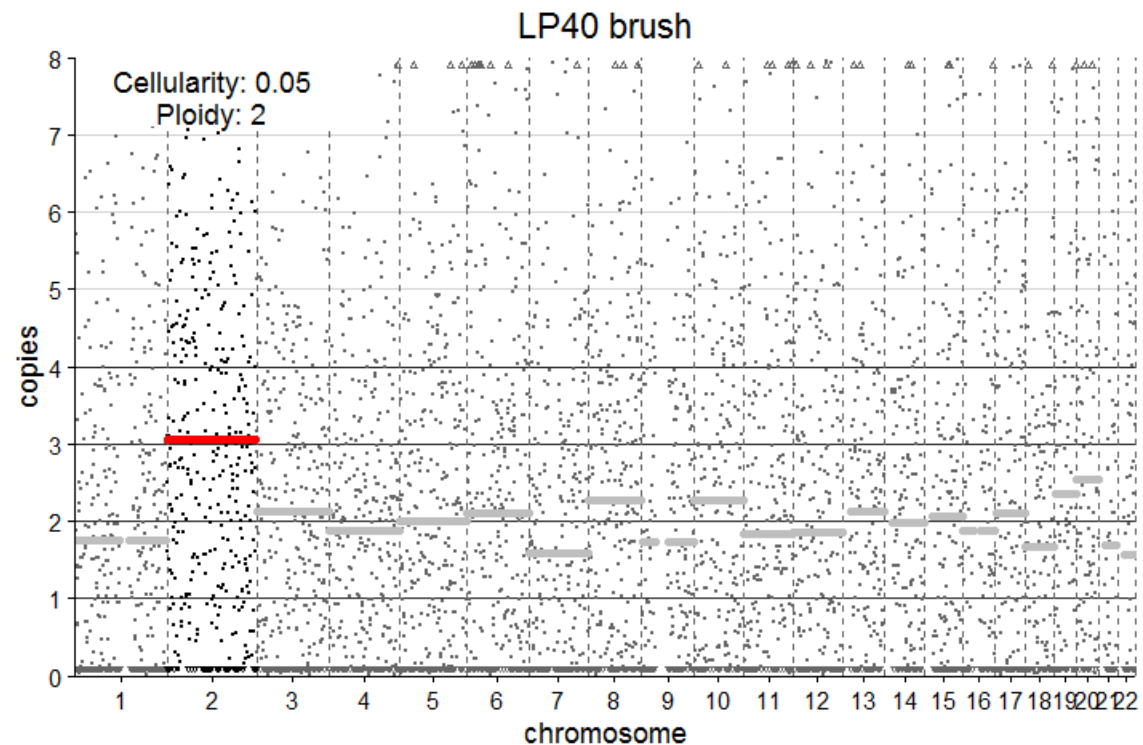

| Sample      | Chr   | Pos       | Gene   | REF | ALT | read depth | ref reads | alt reads | VAF (%) | Change      | Coverage    |      |      |     |
|-------------|-------|-----------|--------|-----|-----|------------|-----------|-----------|---------|-------------|-------------|------|------|-----|
|             |       |           |        |     |     |            |           |           |         |             | Sample      | Mean | Max  | Min |
| LP40-biopsy | chr2  | 202149751 | CASP8  | C   | T   | 417        | 279       | 137       | 32.93   | p.Gln398*   | LP40-biopsy | 511  | 2272 | 5   |
| LP40-biopsy | chr3  | 178936082 | PIK3CA | G   | A   | 274        | 90        | 184       | 67.15   | p.Glu542Lys |             |      |      |     |
| LP40-biopsy | chr4  | 153251907 | FBXW7  | G   | A   | 300        | 232       | 67        | 22.41   | p.Arg367*   |             |      |      |     |
| LP40-biopsy | chr9  | 139412375 | NOTCH1 | C   | T   | 362        | 237       | 125       | 34.53   | p.Glu424Lys |             |      |      |     |
| LP40-biopsy | chr11 | 534289    | HRAS   | C   | T   | 396        | 244       | 152       | 38.38   | p.Gly12Ser  |             |      |      |     |
| LP40-brush  | chr2  | 202149751 | CASP8  | C   | T   | 266        | 203       | 63        | 23.68   | p.Gln398*   |             |      |      |     |
| LP40-brush  | chr3  | 178936082 | PIK3CA | G   | A   | 274        | 220       | 54        | 19.71   | p.Glu542Lys |             |      |      |     |
| LP40-brush  | chr3  | 178936091 | PIK3CA | G   | A   | 279        | 260       | 19        | 6.81    | p.Glu545Lys |             |      |      |     |
| LP40-brush  | chr4  | 153251907 | FBXW7  | G   | A   | 262        | 253       | 9         | 3.44    | p.Arg367*   |             |      |      |     |
| LP40-brush  | chr4  | 187530351 | FAT1   | GA  | G   | 225        | 208       | 17        | 7.56    | p.Leu3397fs |             |      |      |     |
| LP40-brush  | chr4  | 187557972 | FAT1   | G   | A   | 236        | 225       | 11        | 4.66    | p.Gln1247*  |             |      |      |     |
| LP40-brush  | chr9  | 139412375 | NOTCH1 | C   | T   | 351        | 285       | 65        | 18.57   | p.Glu424Lys |             |      |      |     |
| LP40-brush  | chr11 | 534289    | HRAS   | C   | T   | 388        | 348       | 40        | 10.31   | p.Gly12Ser  |             |      |      |     |

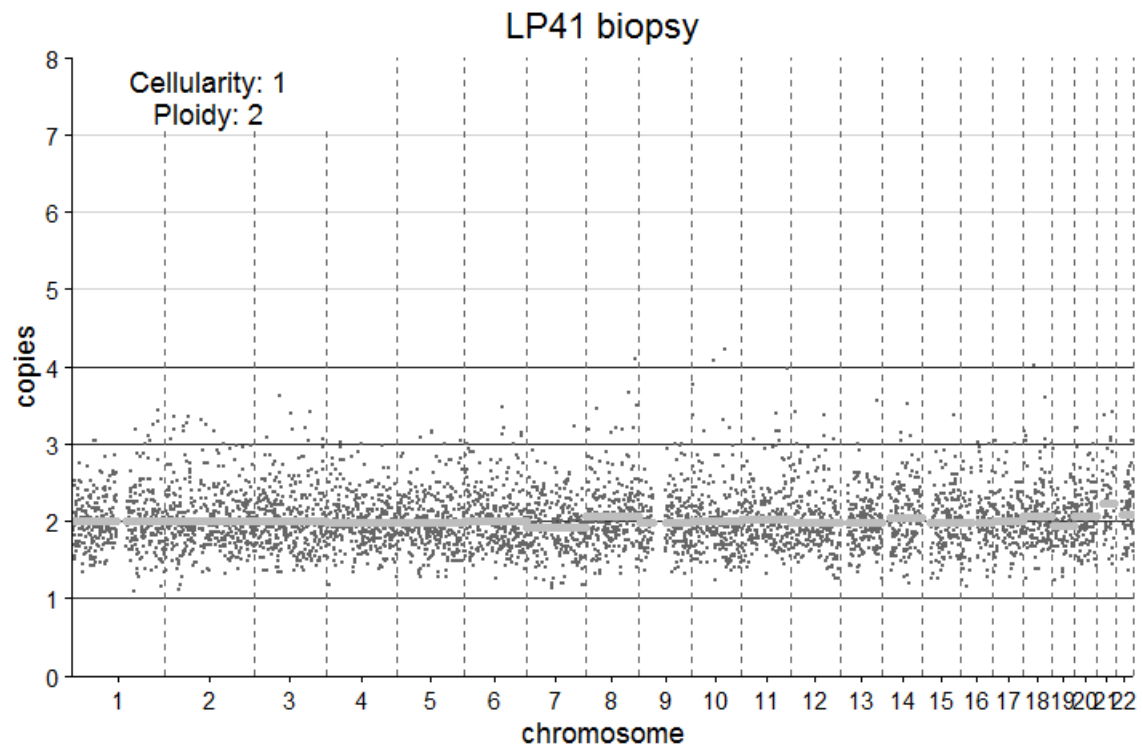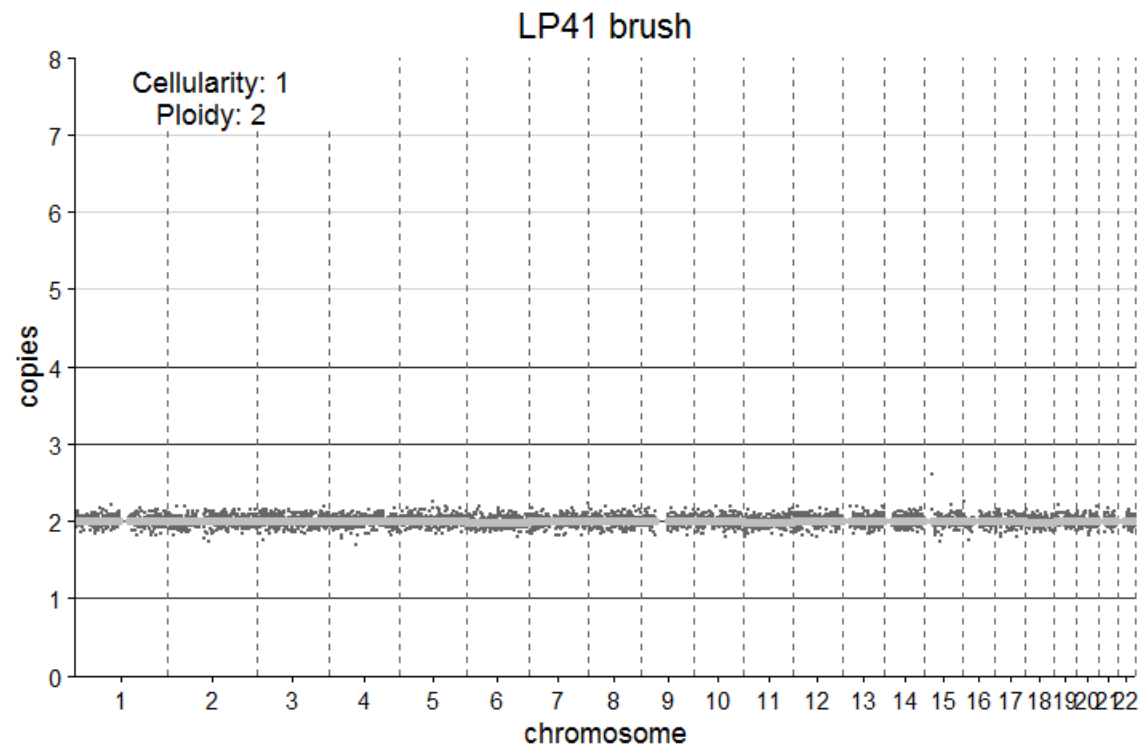

| Sample      | Coverage |      |     |
|-------------|----------|------|-----|
|             | Mean     | Max  | Min |
| LP41-biopsy | 208      | 1228 | 13  |
| LP41-brush  | 22       | 82   | 1   |



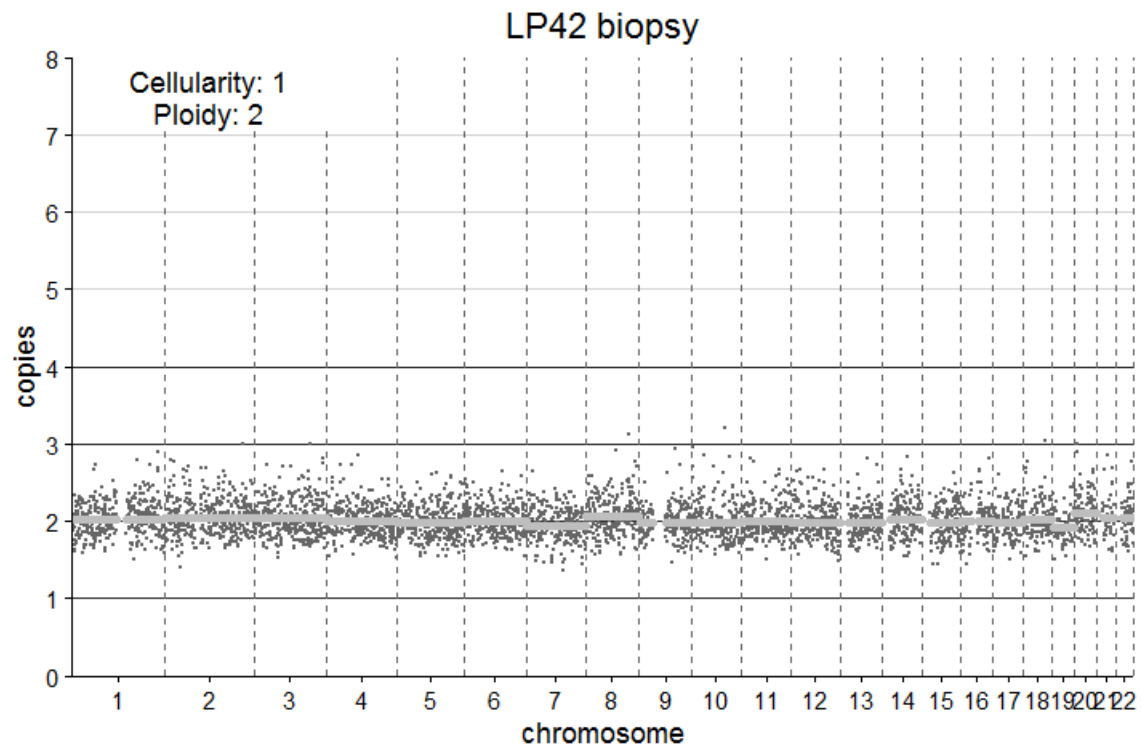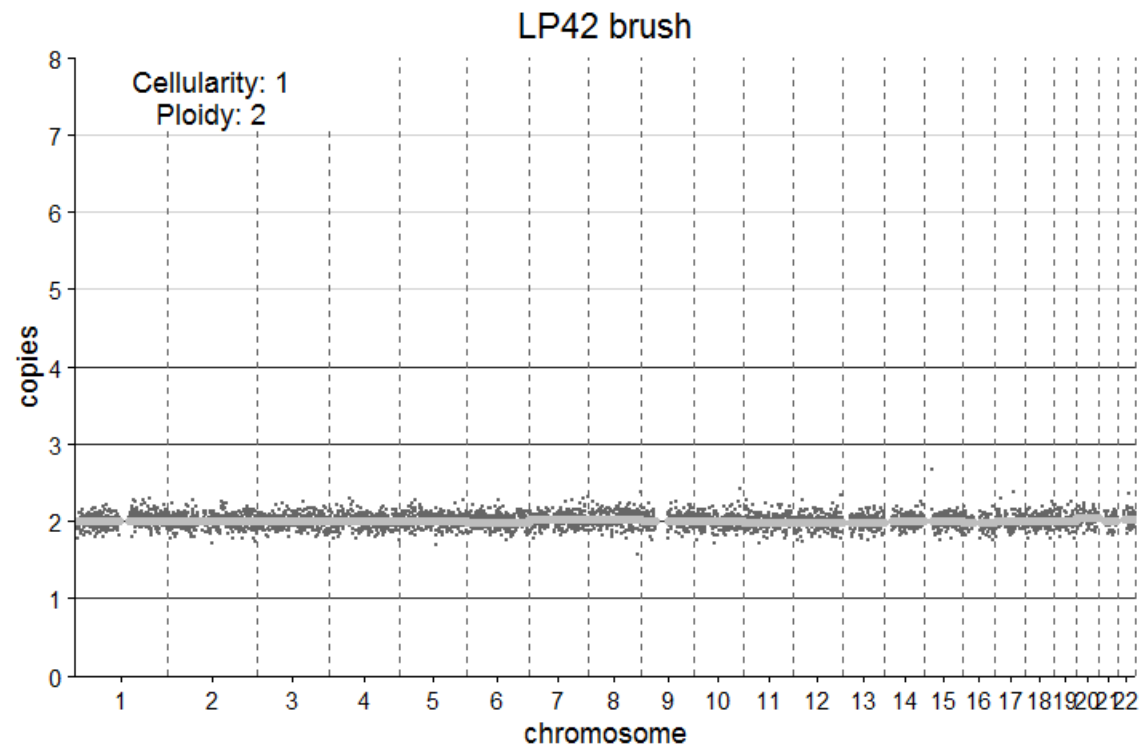

| Sample      | Coverage |      |     |
|-------------|----------|------|-----|
|             | Mean     | Max  | Min |
| LP42-biopsy | 186      | 1197 | 6   |
| LP42-brush  | 197      | 304  | 12  |

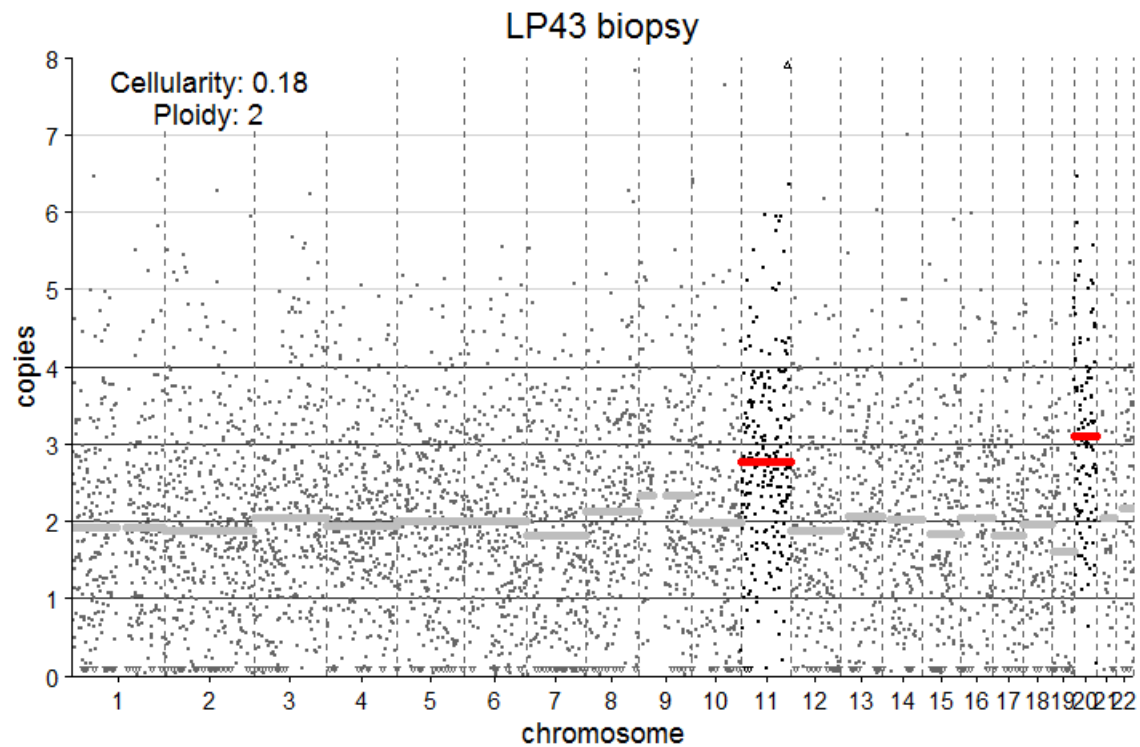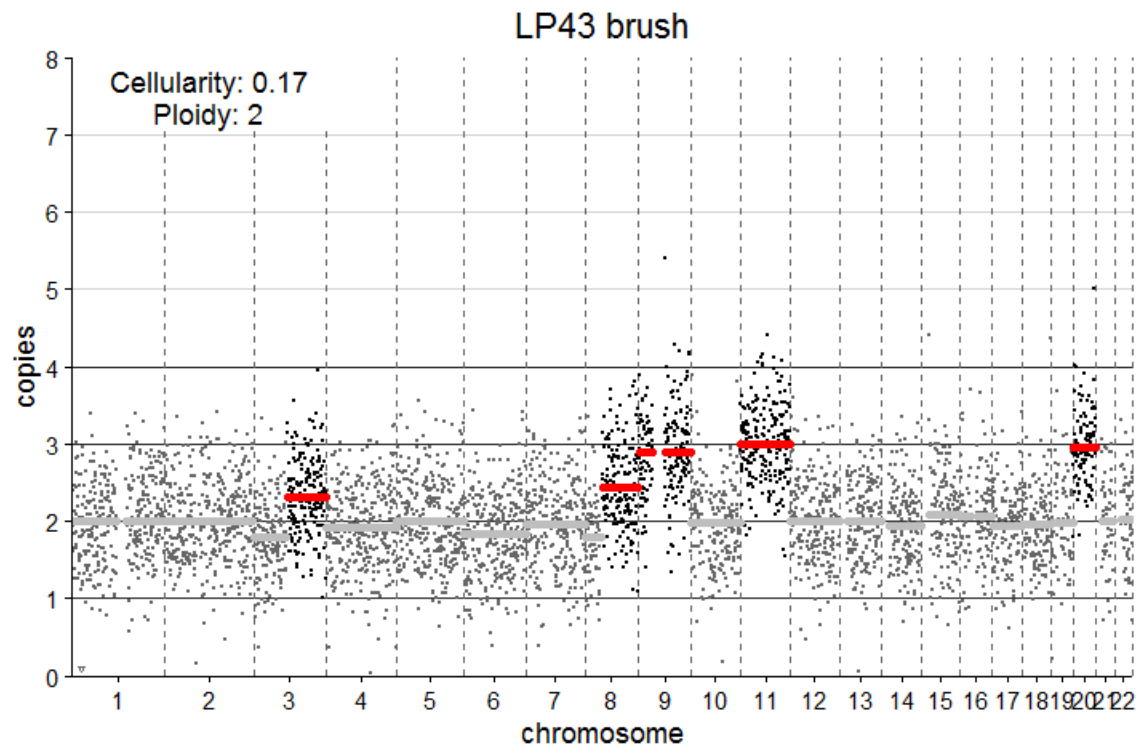

| Sample      | Chr   | Pos     | Gene | REF | ALT | read depth | ref reads | alt reads | VAF (%) | Change    | Coverage    |      |     |     |
|-------------|-------|---------|------|-----|-----|------------|-----------|-----------|---------|-----------|-------------|------|-----|-----|
|             |       |         |      |     |     |            |           |           |         |           | Sample      | Mean | Max | Min |
| LP43-biopsy | chr17 | 7578402 | TP53 | G   | T   | 220        | 198       | 21        | 9.59    | p.Cys176* | LP43-biopsy | 264  | 818 | 3   |
| LP43-brush  | chr17 | 7578402 | TP53 | G   | T   | 40         | 33        | 7         | 17.5    | p.Cys176* | LP43-brush  | 41   | 143 | 4   |

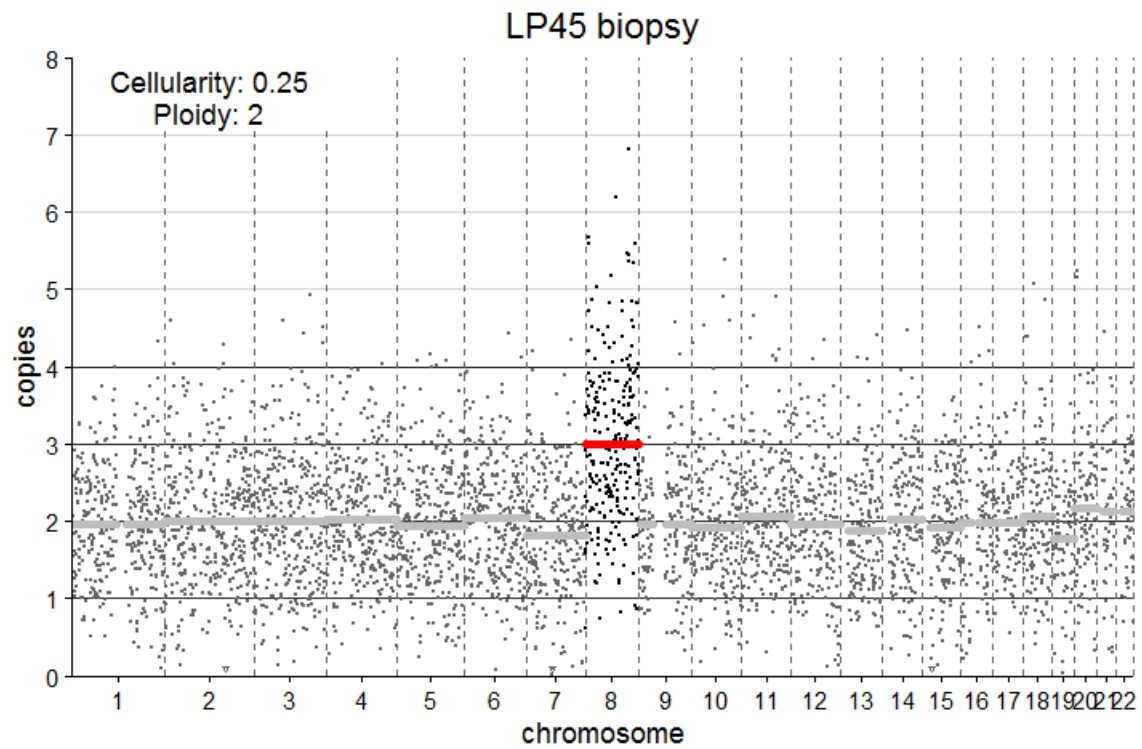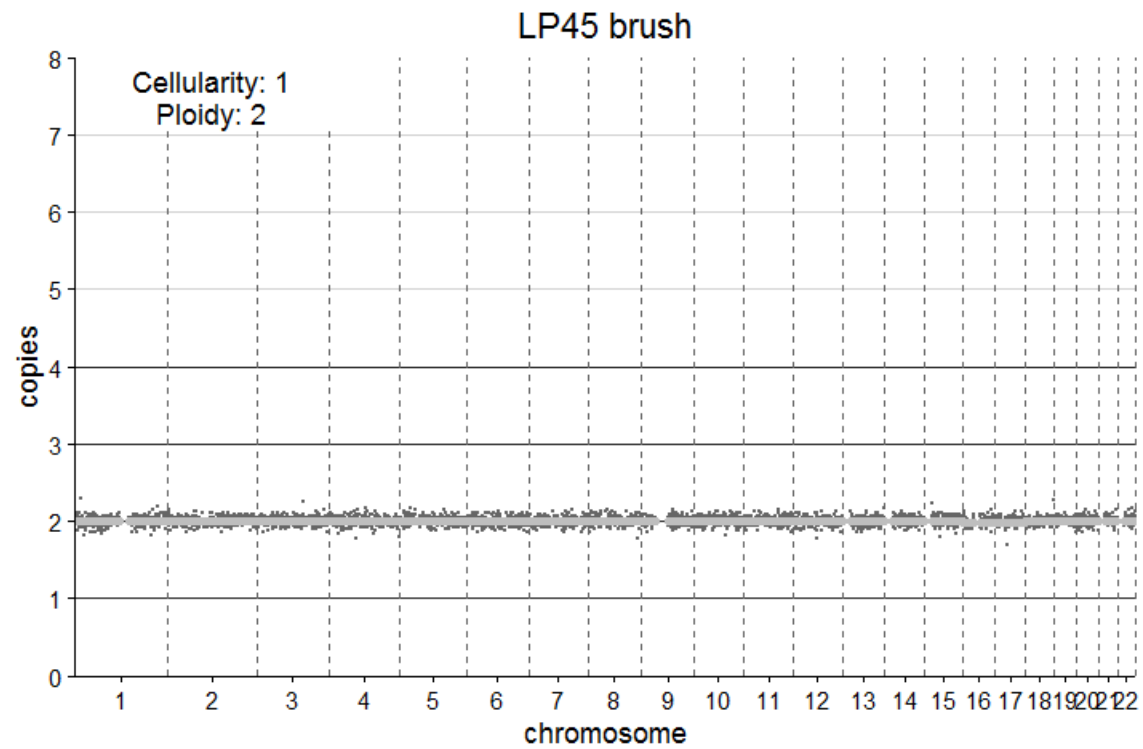

| Sample      | Coverage |      |     |
|-------------|----------|------|-----|
|             | Mean     | Max  | Min |
| LP45-biopsy | 200      | 1051 | 2   |
| LP45-brush  | 572      | 897  | 53  |

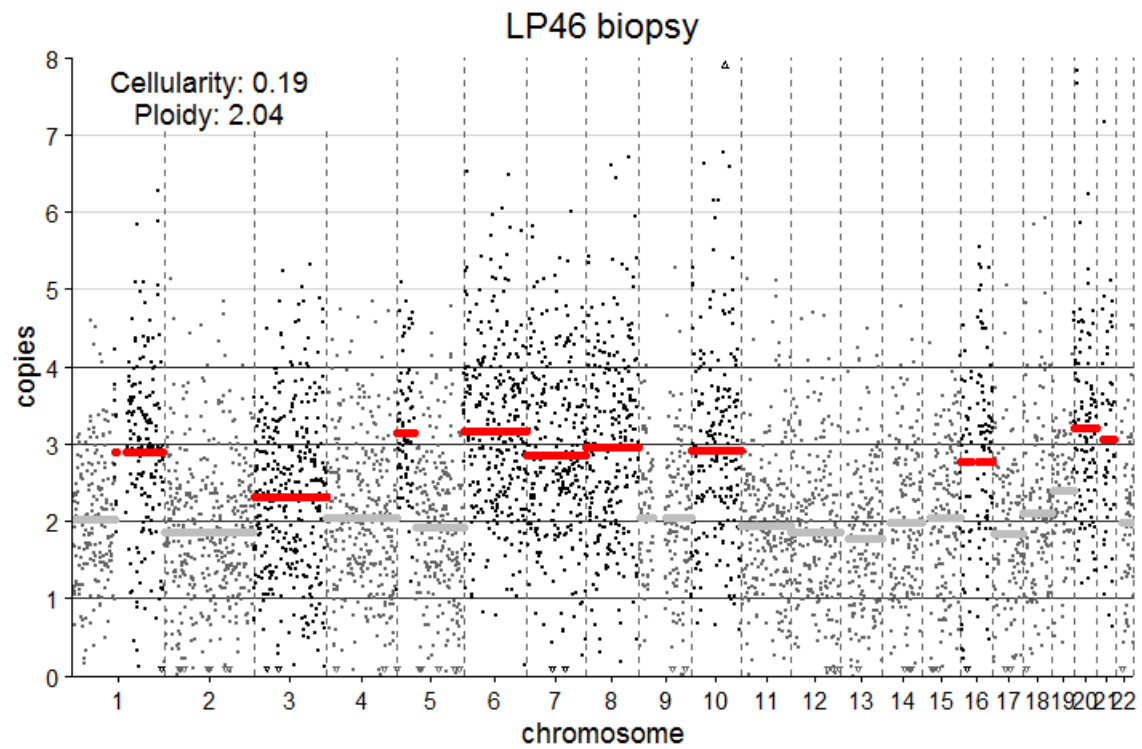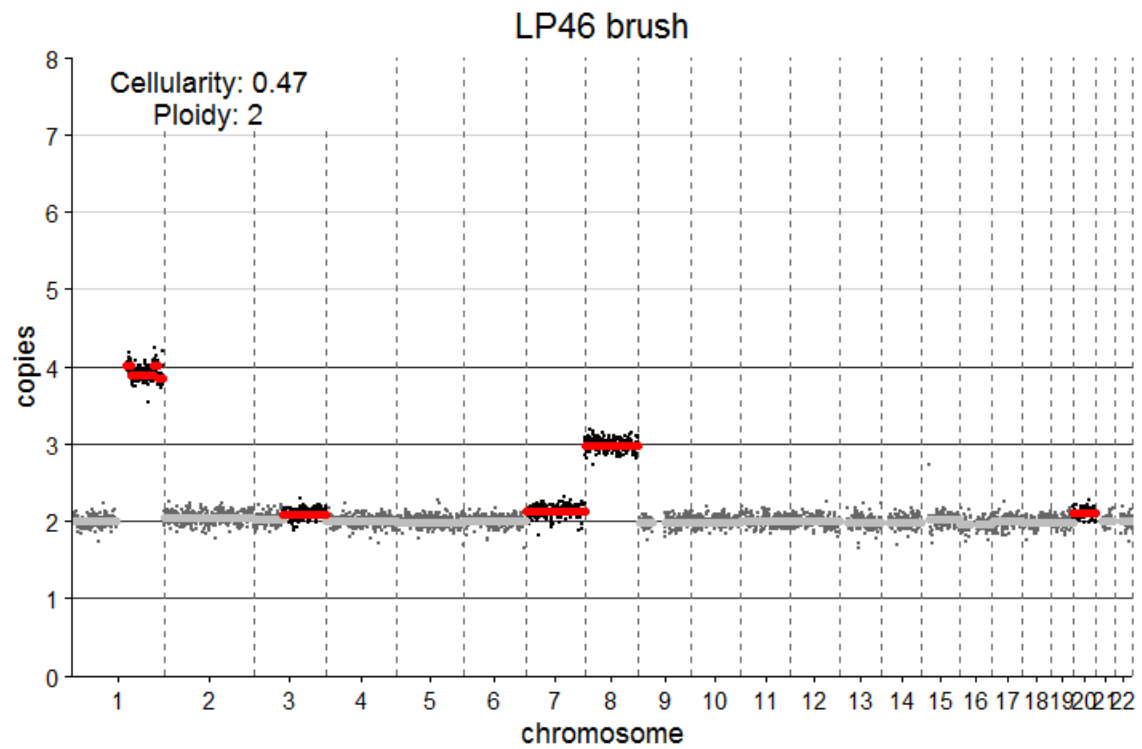

| Sample      | Coverage |      |     |
|-------------|----------|------|-----|
|             | Mean     | Max  | Min |
| LP46-biopsy | 310      | 2566 | 20  |
| LP46-brush  | 517      | 991  | 39  |

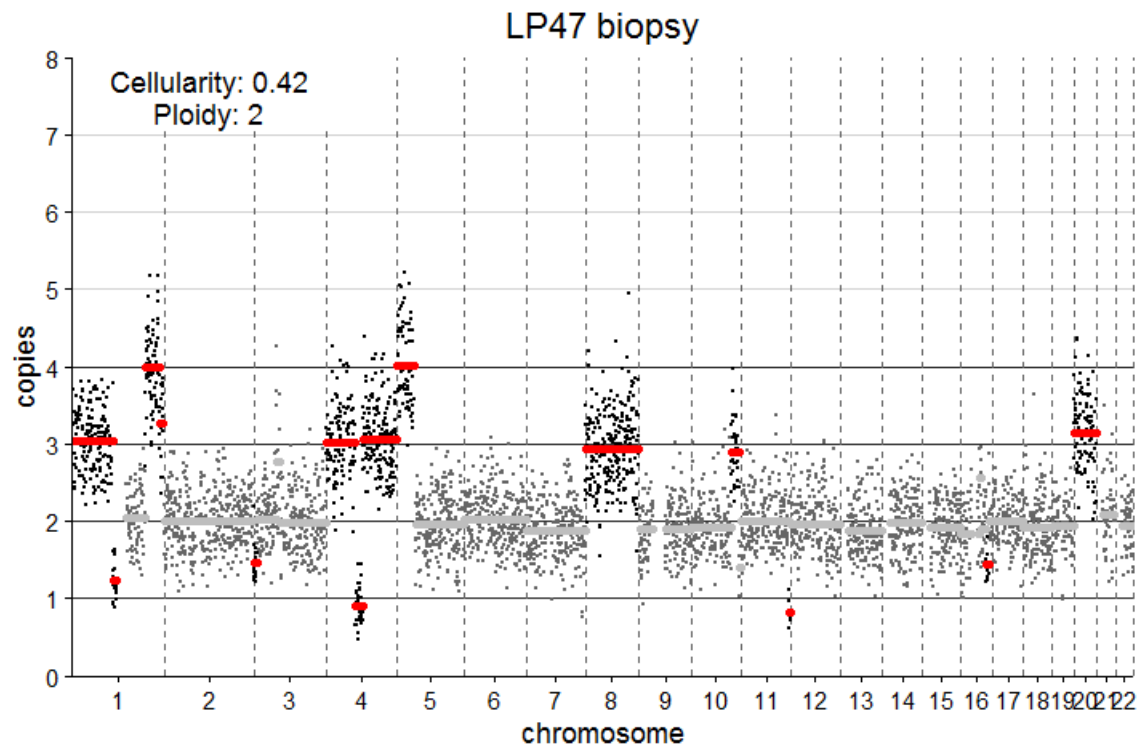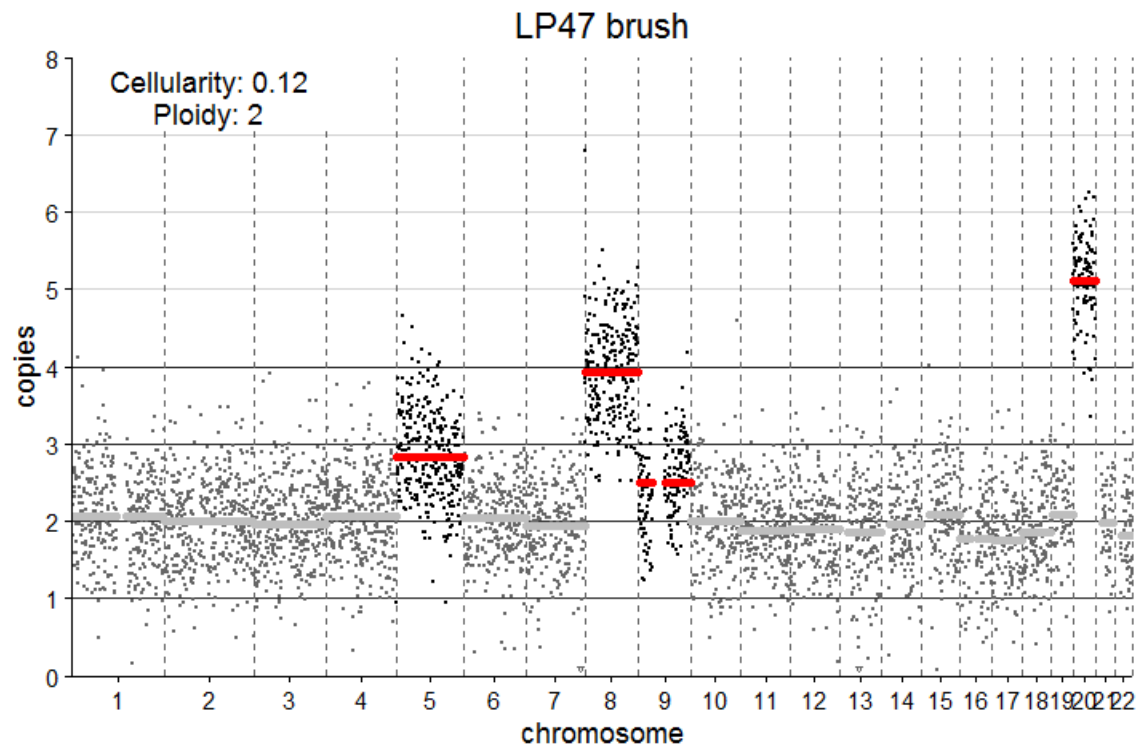

| Sample     | Chr  | Pos       | Gene   | REF  | ALT | read depth | ref reads | alt reads | VAF (%) | Change             | Coverage   |      |      |     |
|------------|------|-----------|--------|------|-----|------------|-----------|-----------|---------|--------------------|------------|------|------|-----|
|            |      |           |        |      |     |            |           |           |         |                    | Sample     | Mean | Max  | Min |
| LP47-brush | chr9 | 139399879 | NOTCH1 | C    | T   | 242        | 232       | 10        | 4.13    | p.Cys1490Tyr       | LP47-brush | 315  | 1457 | 6   |
| LP47-brush | chr9 | 139412289 | NOTCH1 | G..C | G   | 251        | 228       | 23        | 9.16    | p.Glu450_Ile451del | LP47-brush | 231  | 389  | 17  |

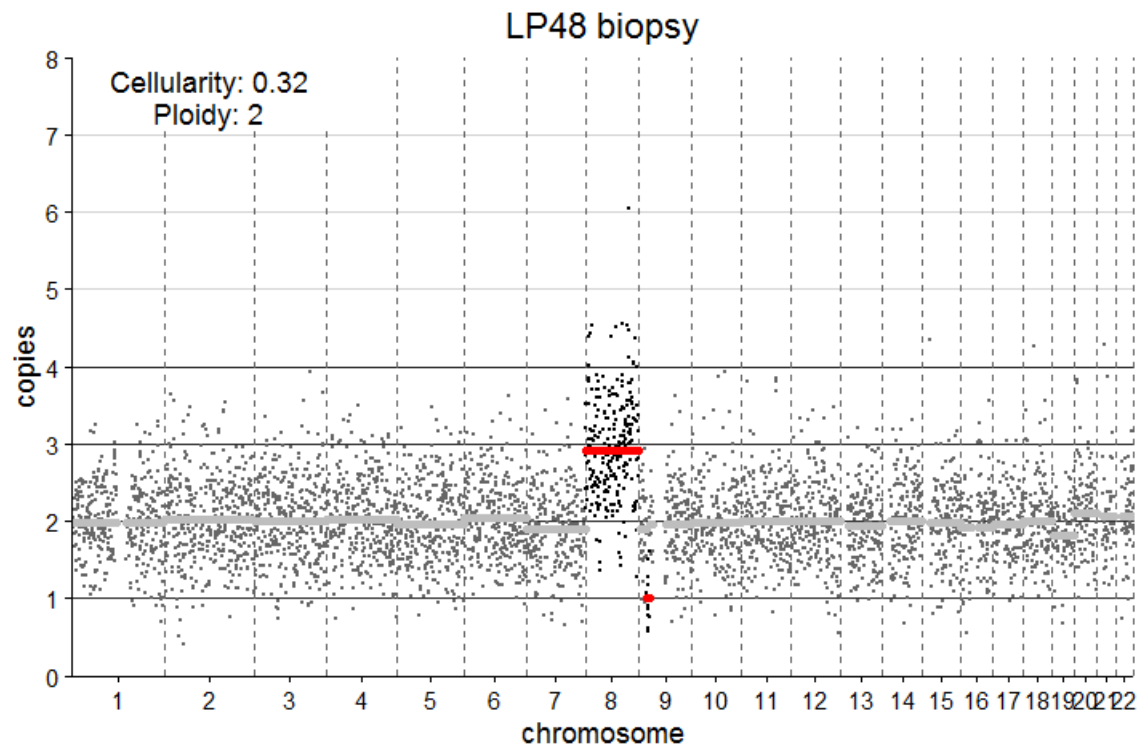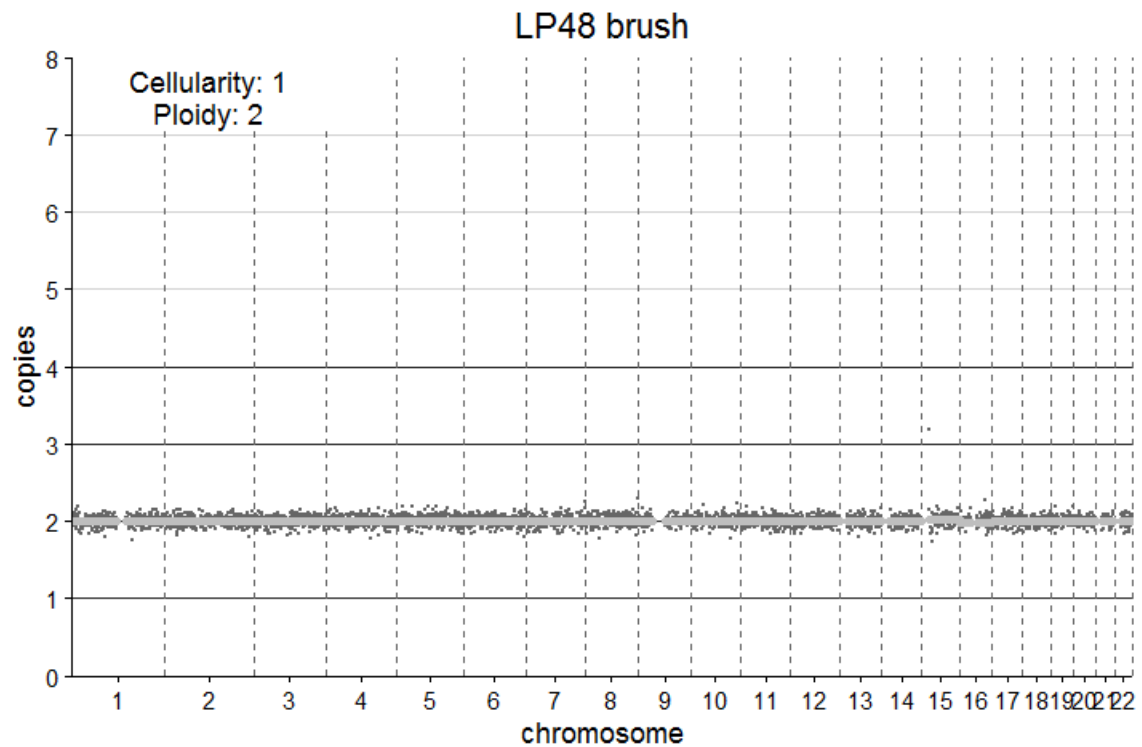

| Sample      | Chr  | Pos       | Gene   | REF | ALT | read depth | ref reads | alt reads | VAF (%) | Change      | Coverage    |      |     |     |
|-------------|------|-----------|--------|-----|-----|------------|-----------|-----------|---------|-------------|-------------|------|-----|-----|
|             |      |           |        |     |     |            |           |           |         |             | Sample      | Mean | Max | Min |
| LP48-biopsy | chr3 | 178936094 | PIK3CA | C   | A   | 172        | 150       | 22        | 12.79   | p.Gln546Lys | LP48-biopsy | 257  | 952 | 9   |
|             |      |           |        |     |     |            |           |           |         |             | LP48-brush  | 639  | 851 | 46  |

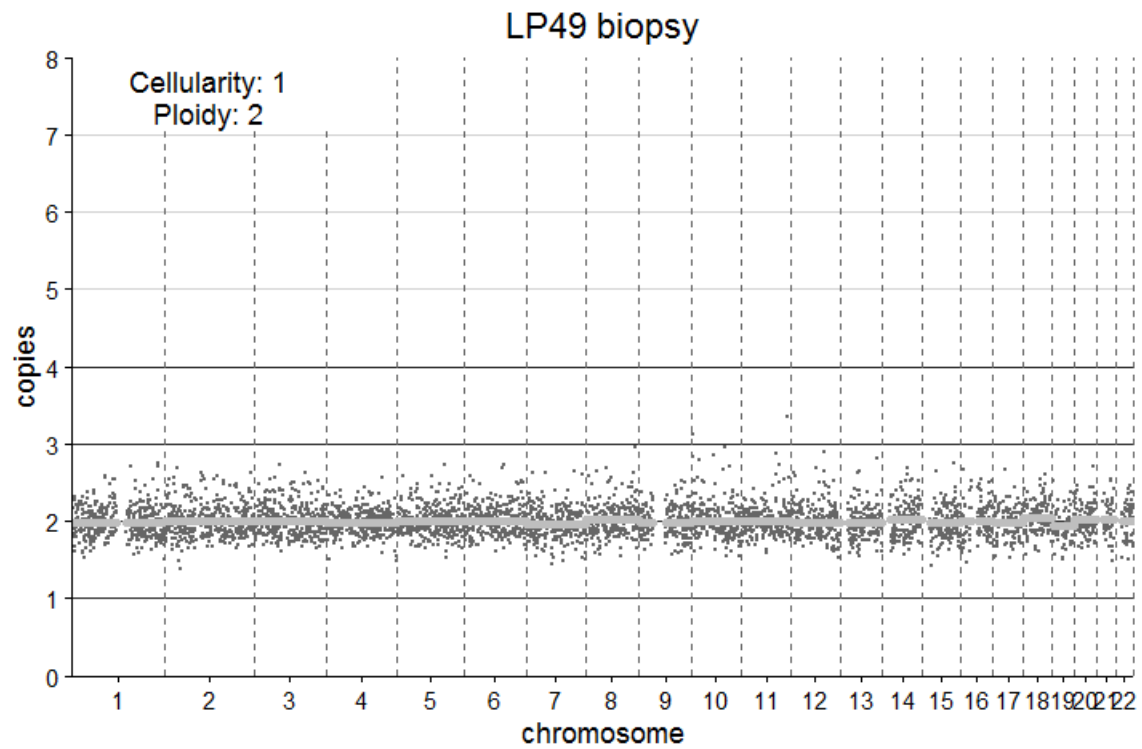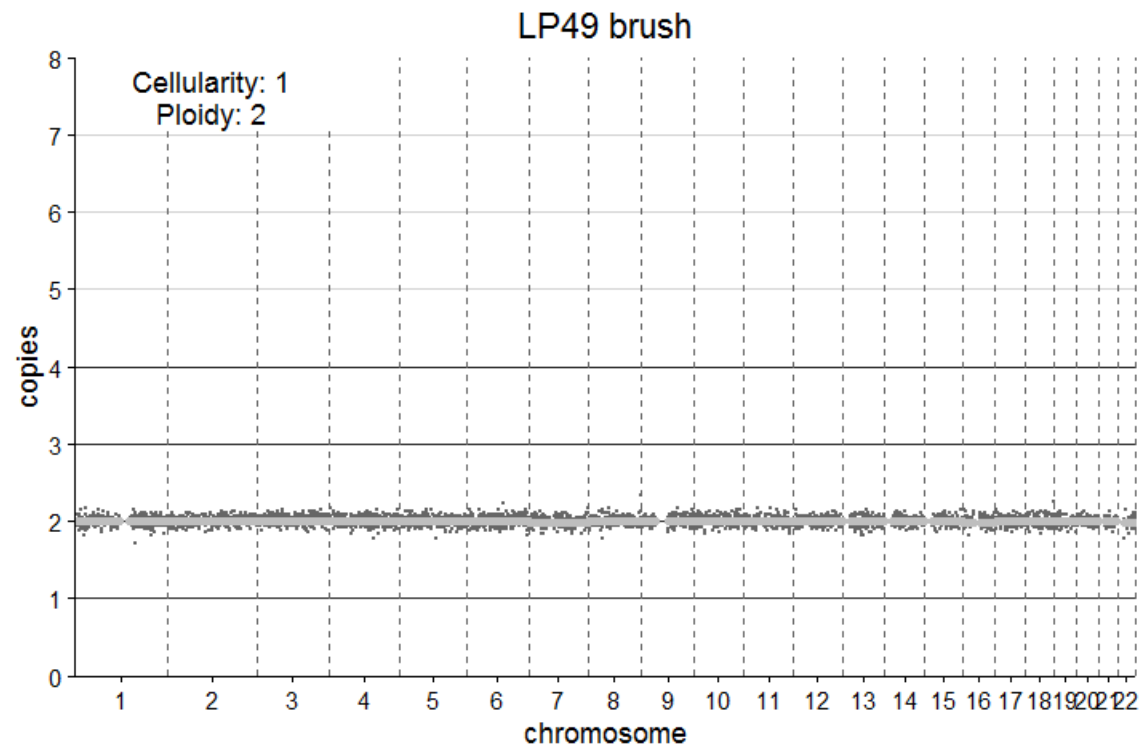

| Sample      | Coverage |     |     |
|-------------|----------|-----|-----|
|             | Mean     | Max | Min |
| LP49-biopsy | 290      | 812 | 9   |
| LP49-brush  | 186      | 347 | 18  |

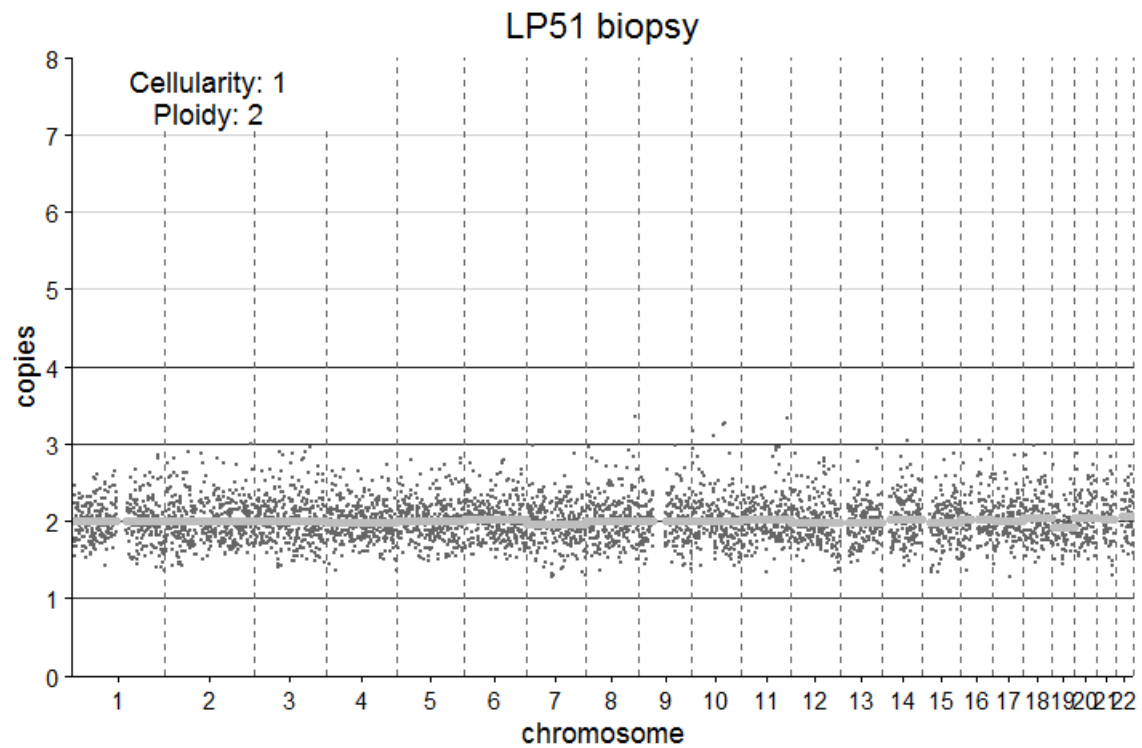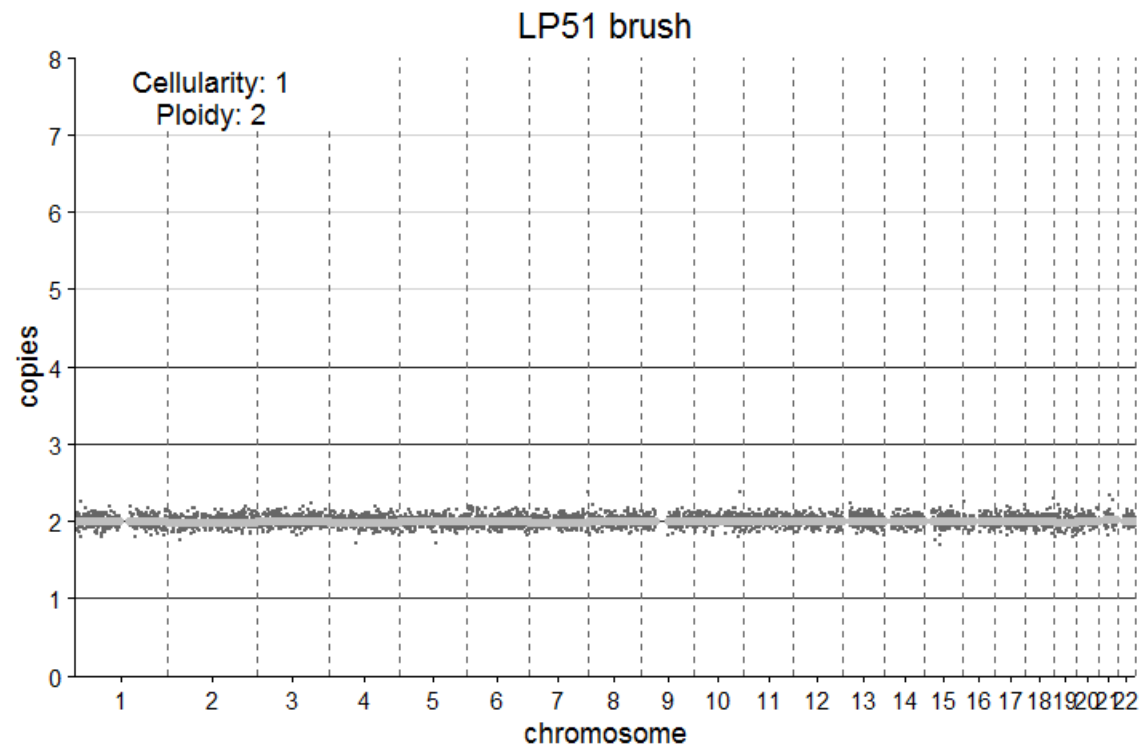

| Sample      | Coverage |      |     |
|-------------|----------|------|-----|
|             | Mean     | Max  | Min |
| LP51-biopsy | 209      | 1098 | 5   |
| LP51-brush  | 169      | 321  | 7   |



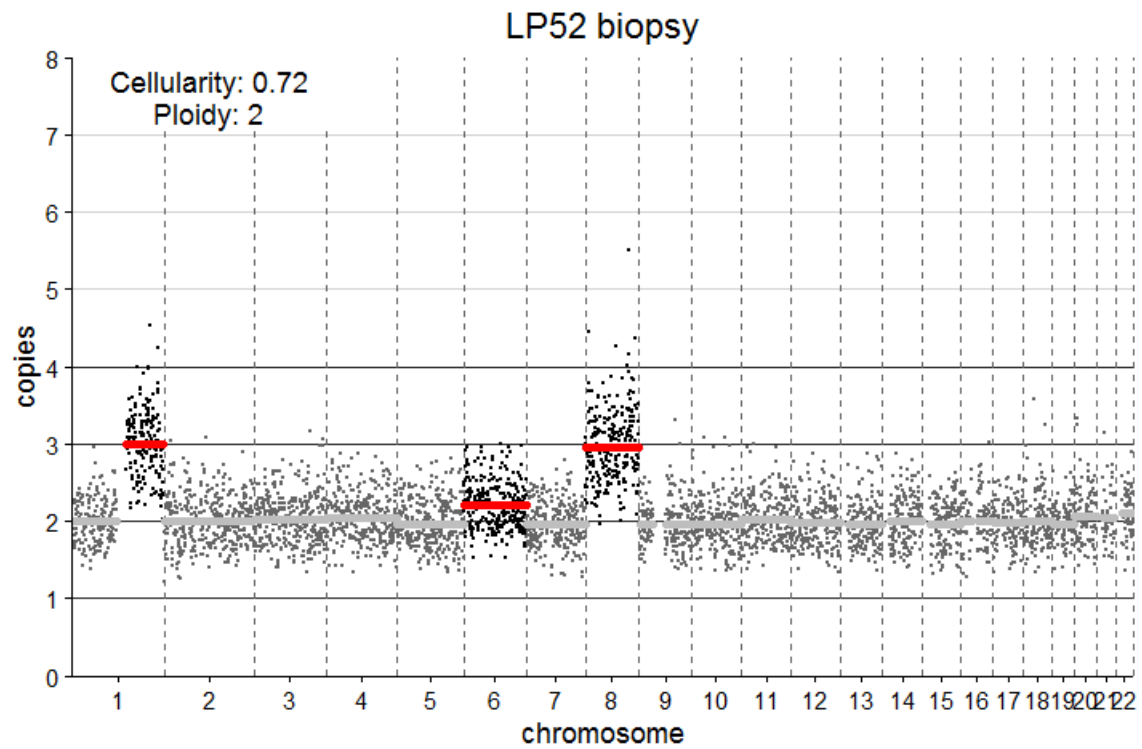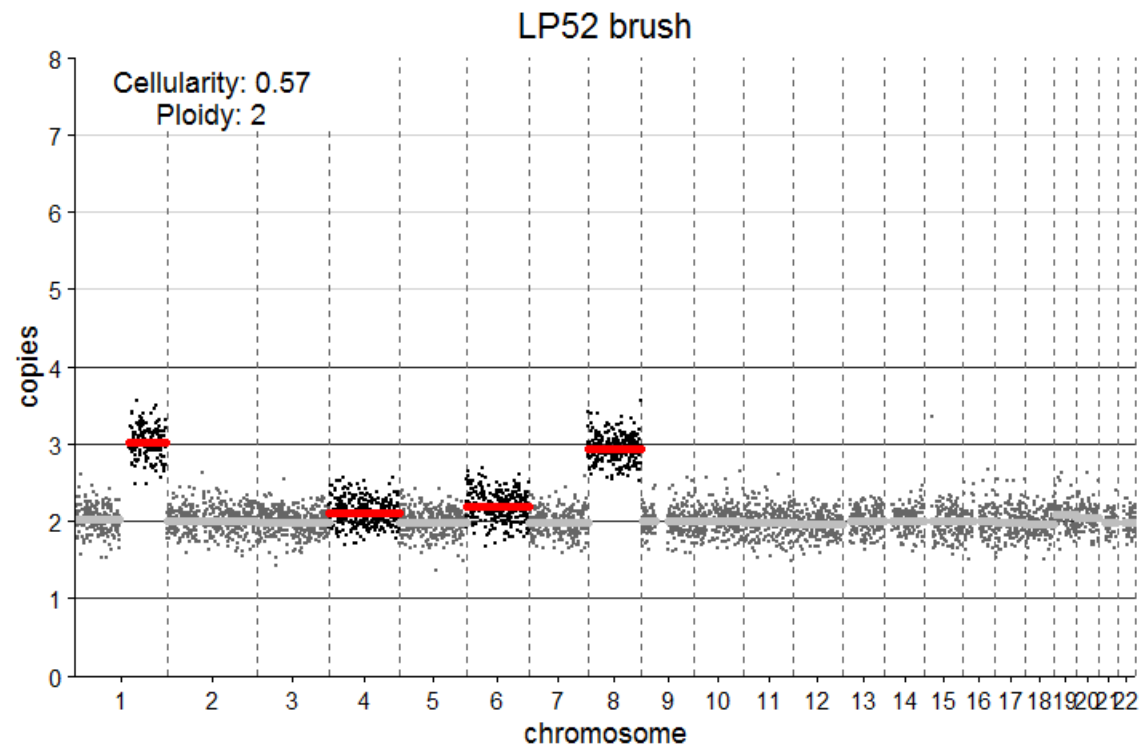

| Sample      | Coverage |      |     |
|-------------|----------|------|-----|
|             | Mean     | Max  | Min |
| LP52-biopsy | 207      | 1110 | 6   |
| LP52-brush  | 343      | 827  | 24  |

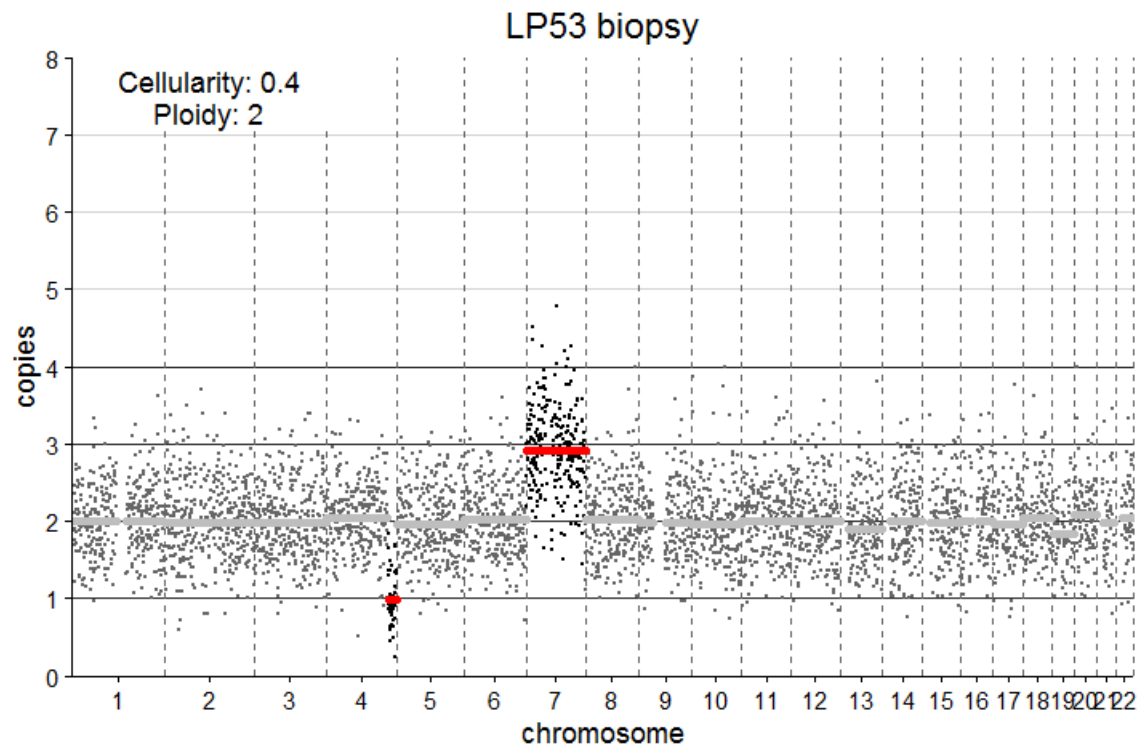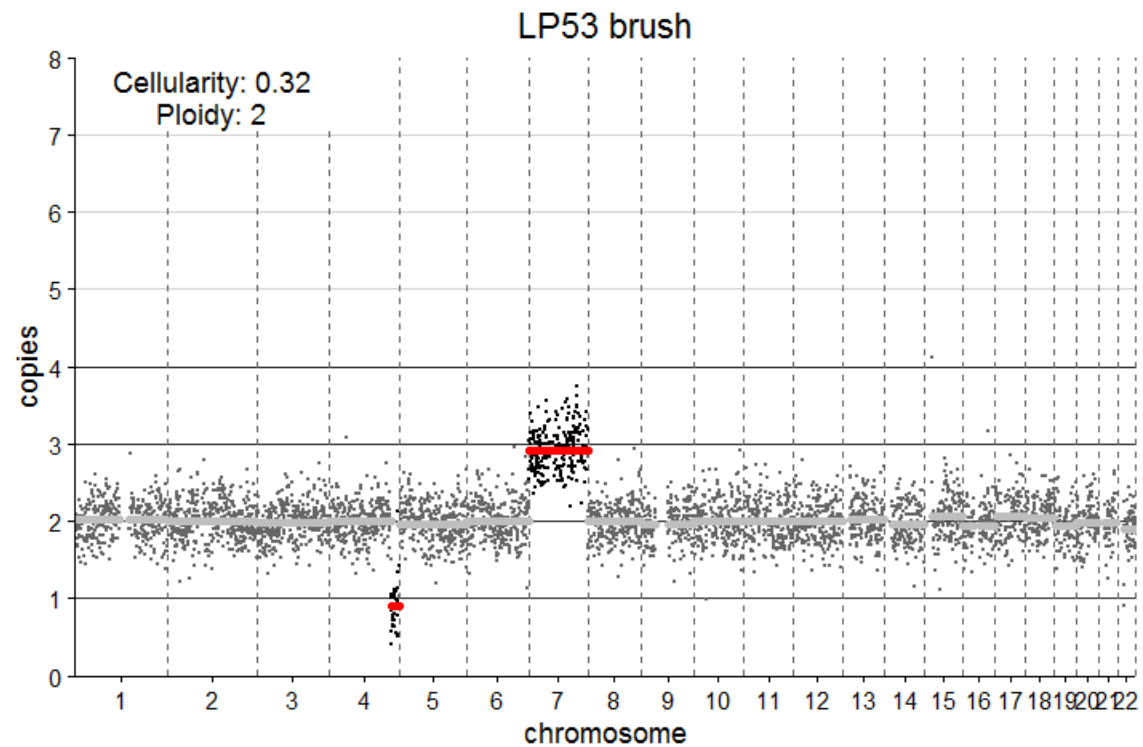

| Sample      | Chr   | Pos       | Gene  | REF | ALT  | read depth | ref reads | alt reads | VAF (%) | Change      | Coverage    |      |      |     |
|-------------|-------|-----------|-------|-----|------|------------|-----------|-----------|---------|-------------|-------------|------|------|-----|
|             |       |           |       |     |      |            |           |           |         |             | Sample      | Mean | Max  | Min |
| LP53-biopsy | chr12 | 49443530  | KMT2D | C   | A    | 140        | 129       | 11        | 7.86    | p.Gly1281*  |             |      |      |     |
| LP53-biopsy | chr17 | 7577562   | TP53  | C   | CTGT | 183        | 149       | 34        | 18.58   | p.Asn239dup | LP53-biopsy | 132  | 495  | 1   |
| LP53-brush  | chr4  | 187521283 | FAT1  | G   | A    | 1247       | 1161      | 86        | 6.9     | p.Gln3958*  | LP53-brush  | 1616 | 2535 | 192 |
| LP53-brush  | chr12 | 49443530  | KMT2D | C   | A    | 1669       | 1604      | 65        | 3.89    | p.Gly1281*  |             |      |      |     |
| LP53-brush  | chr17 | 7577562   | TP53  | C   | CTGT | 1765       | 1463      | 302       | 17.11   | p.Asn239dup |             |      |      |     |

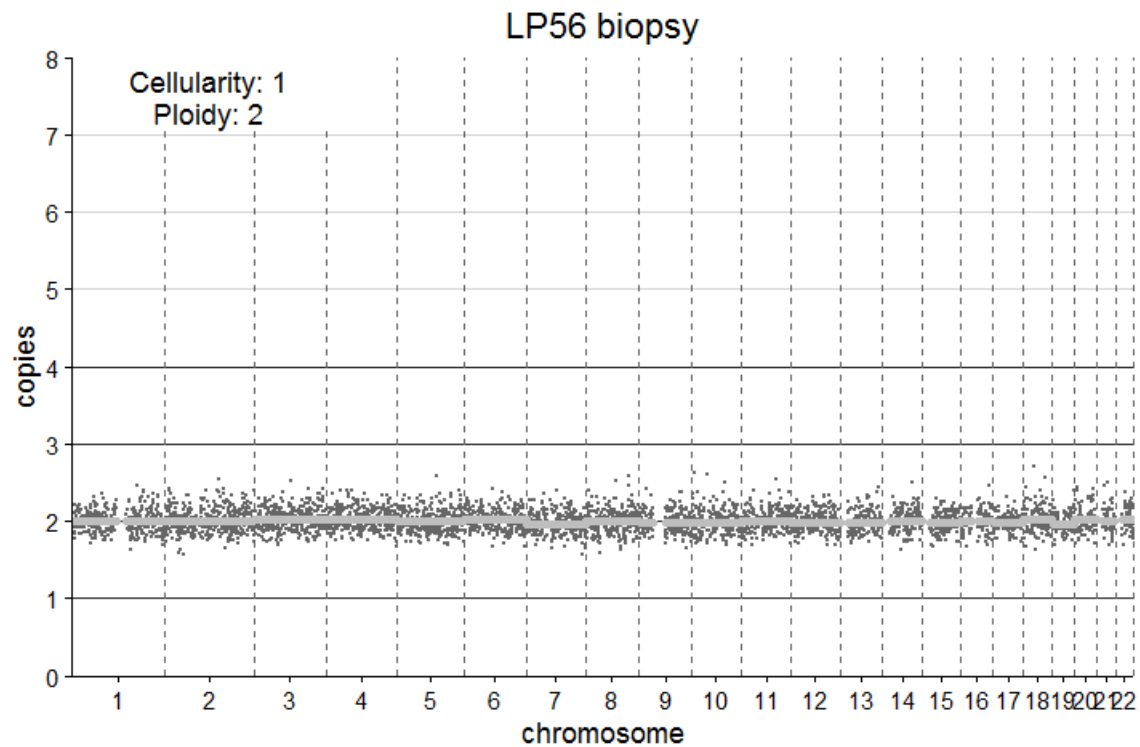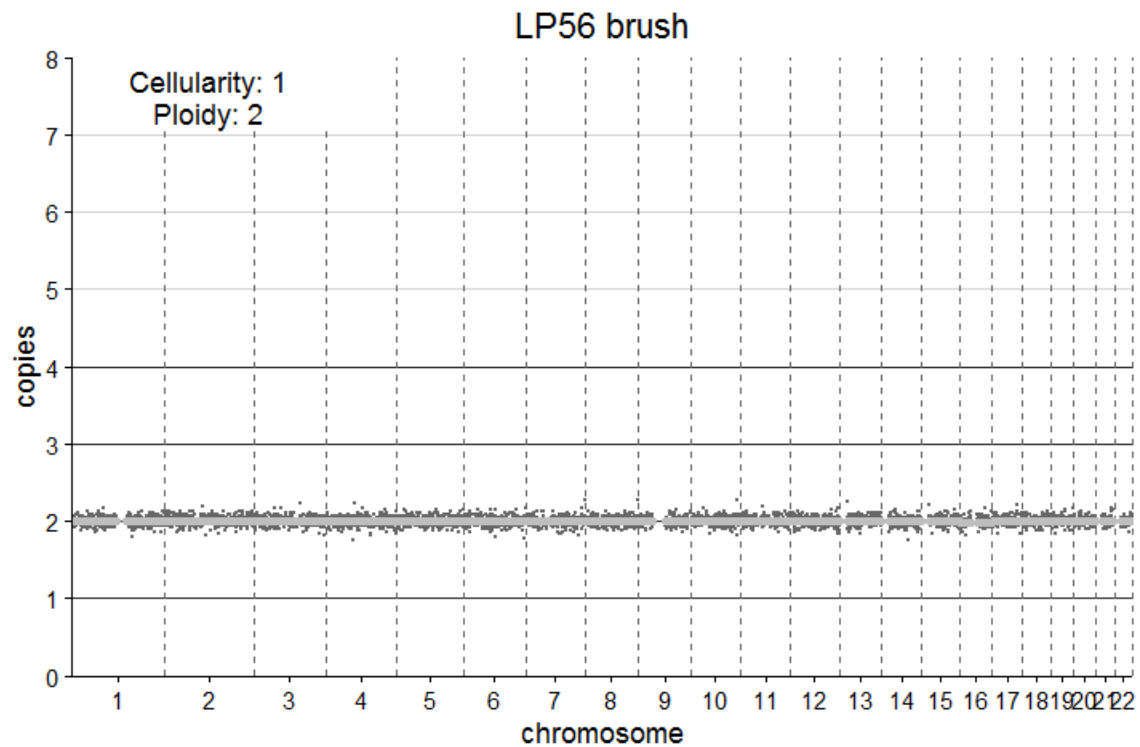

| Sample      | Chr  | Pos       | Gene   | REF  | ALT | read depth | ref reads | alt reads | VAF (%) | Change       | Coverage    |      |     |     |
|-------------|------|-----------|--------|------|-----|------------|-----------|-----------|---------|--------------|-------------|------|-----|-----|
|             |      |           |        |      |     |            |           |           |         |              | Sample      | Mean | Max | Min |
| LP56-biopsy | chr9 | 139393419 | NOTCH1 | C    | T   | 243        | 170       | 73        | 30.04   | p.Val2038Met | LP56-biopsy | 271  | 874 | 4   |
| LP56-brush  | chr9 | 139390944 | NOTCH1 | TGTG | T   | 64         | 57        | 7         | 10.94   | p.Pro2415del | LP56-brush  | 68   | 378 | 11  |

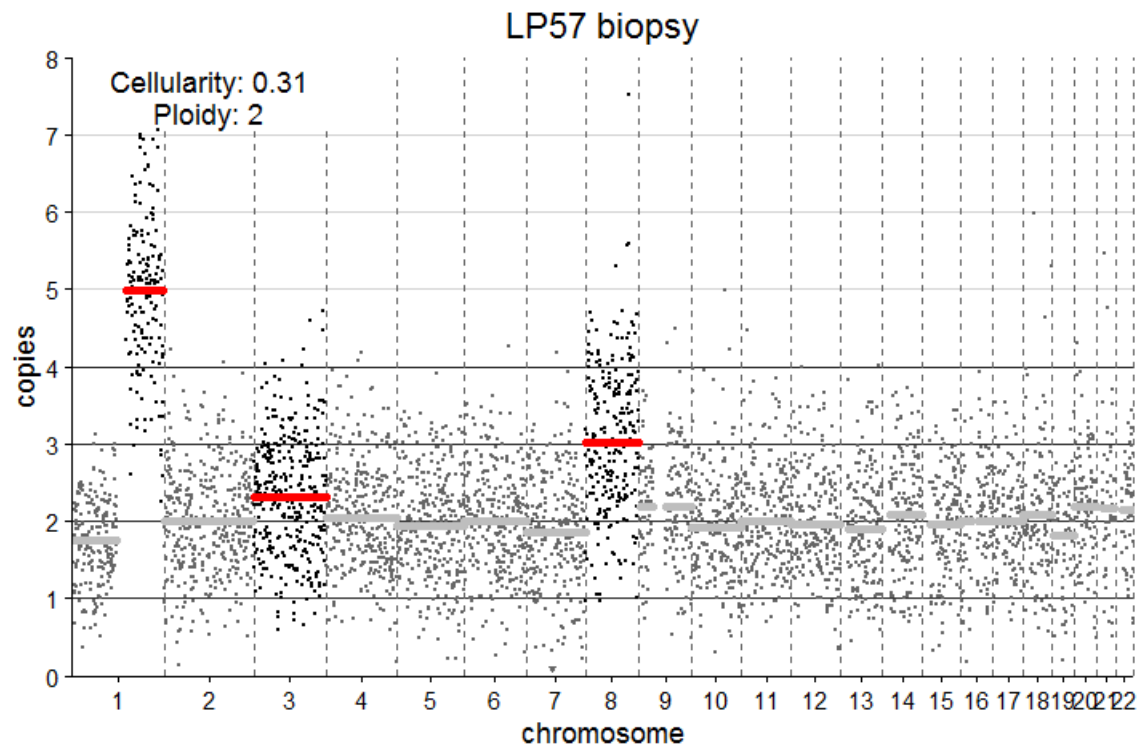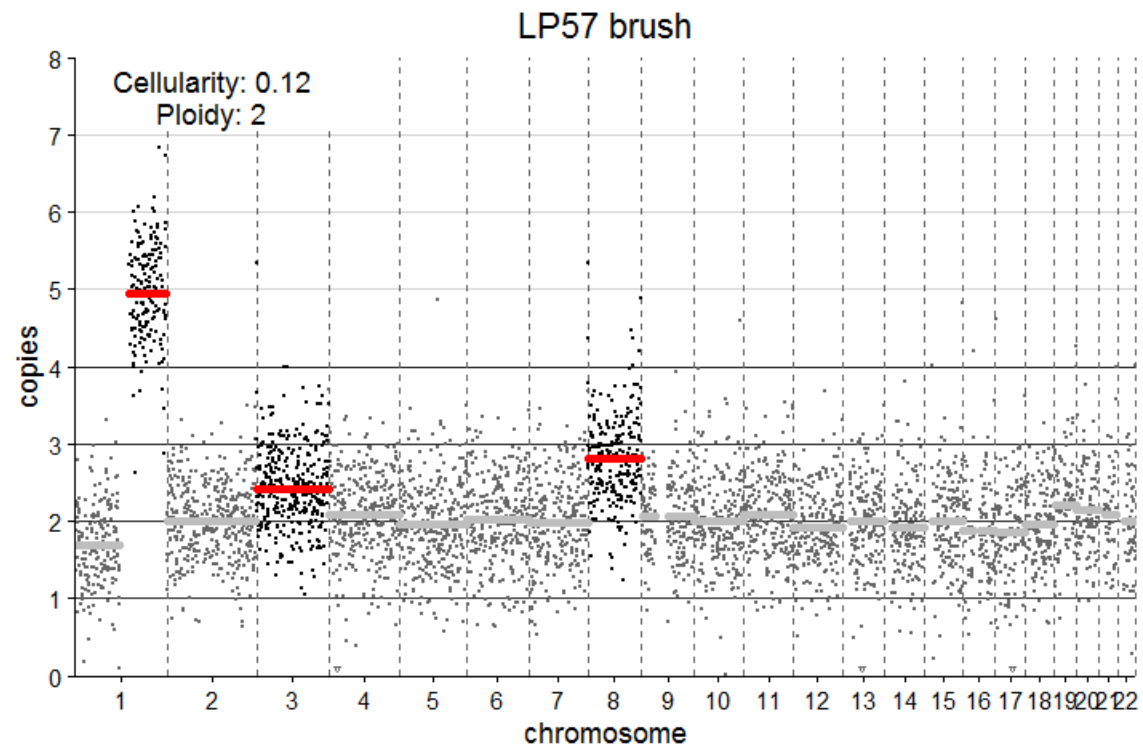

| Sample      | Coverage |      |     |
|-------------|----------|------|-----|
|             | Mean     | Max  | Min |
| LP57-biopsy | 271      | 1157 | 6   |
| LP57-brush  | 93       | 378  | 6   |

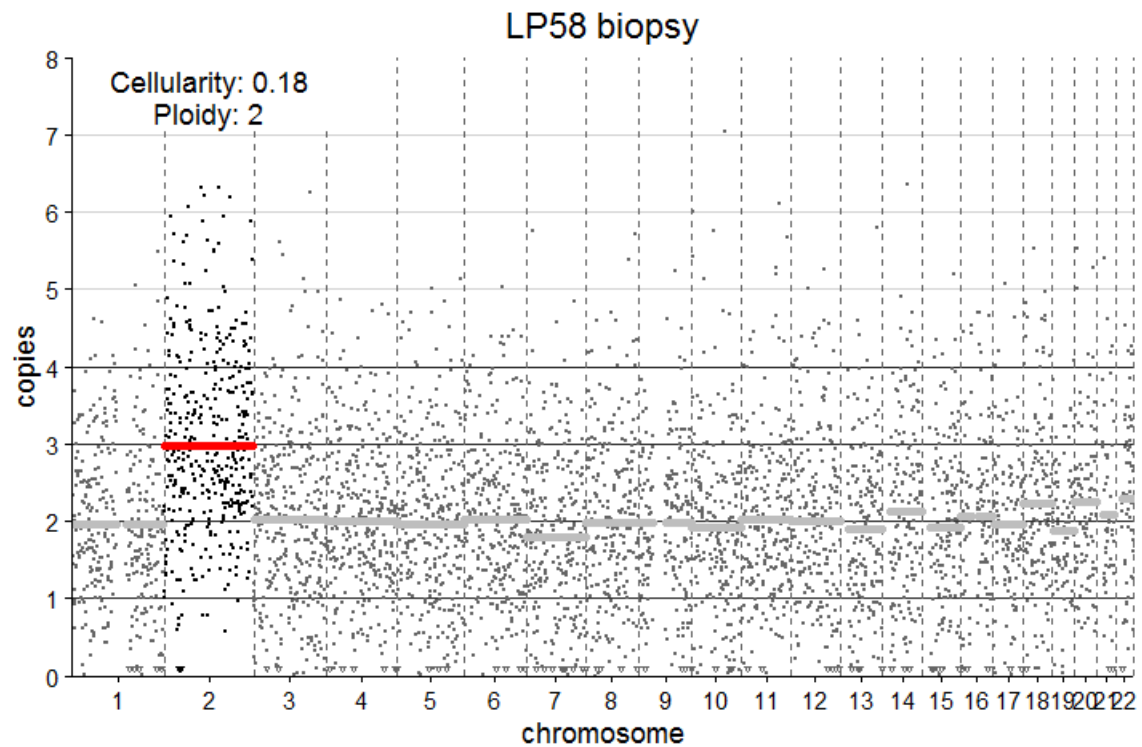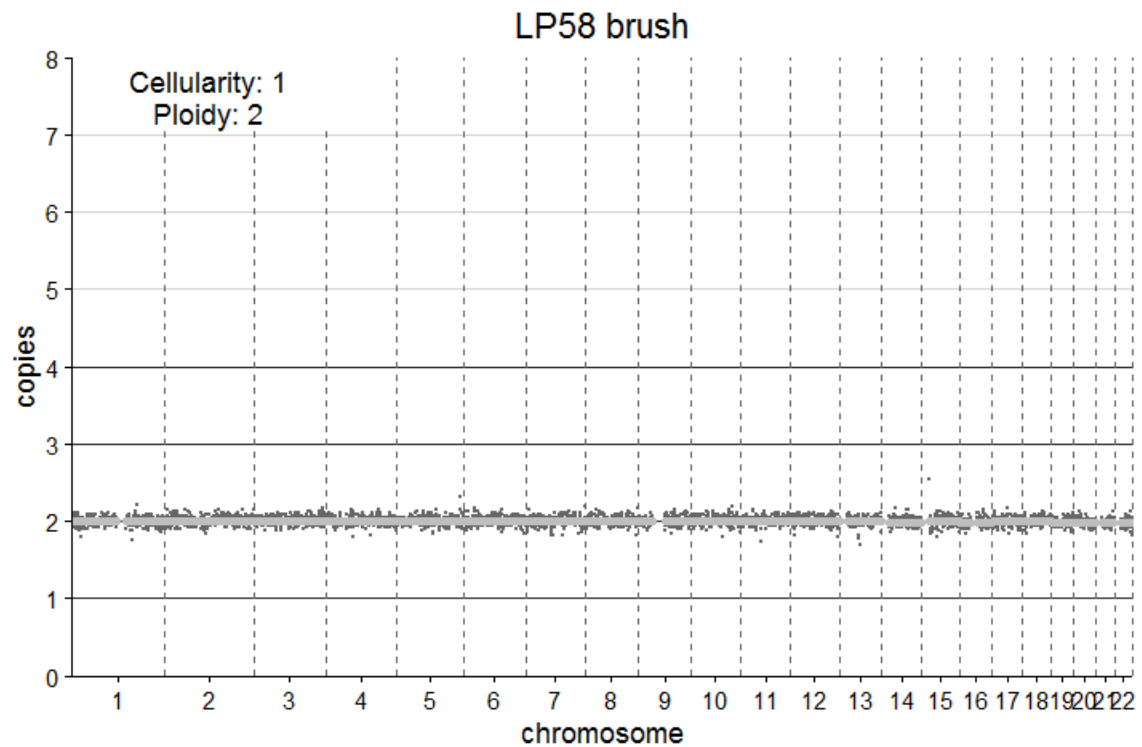

| Sample      | Coverage |      |     |
|-------------|----------|------|-----|
|             | Mean     | Max  | Min |
| LP58-biopsy | 296      | 1215 | 10  |
| LP58-brush  | 2439     | 3598 | 224 |

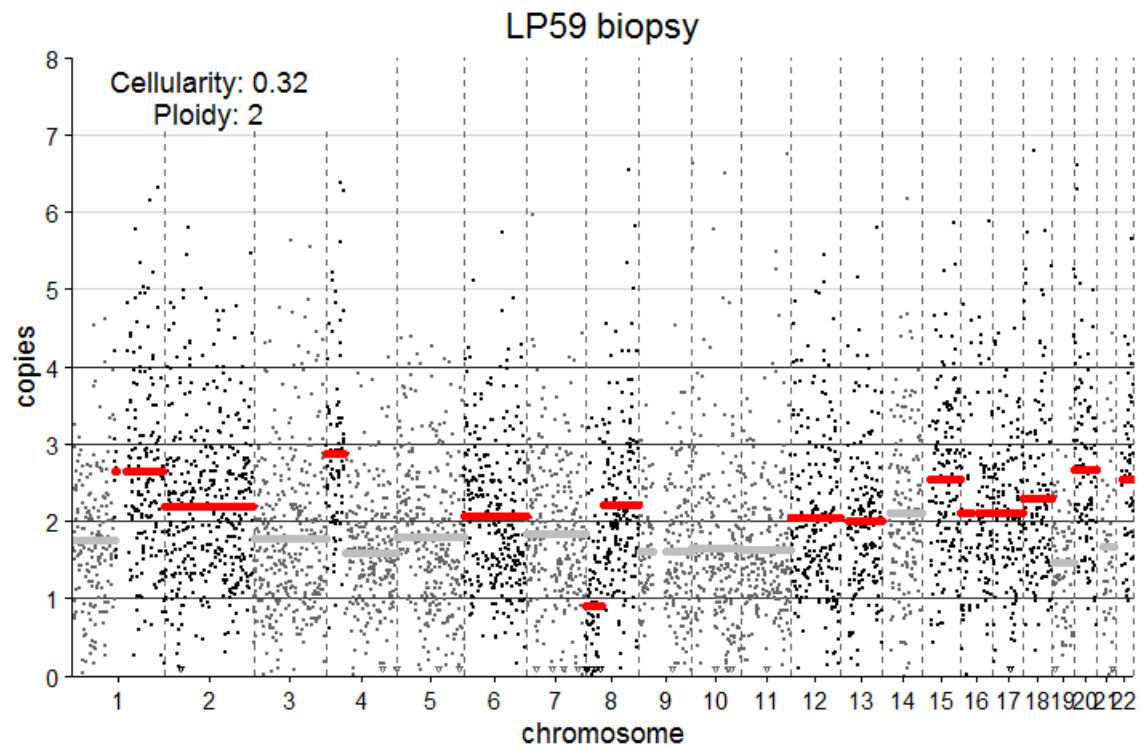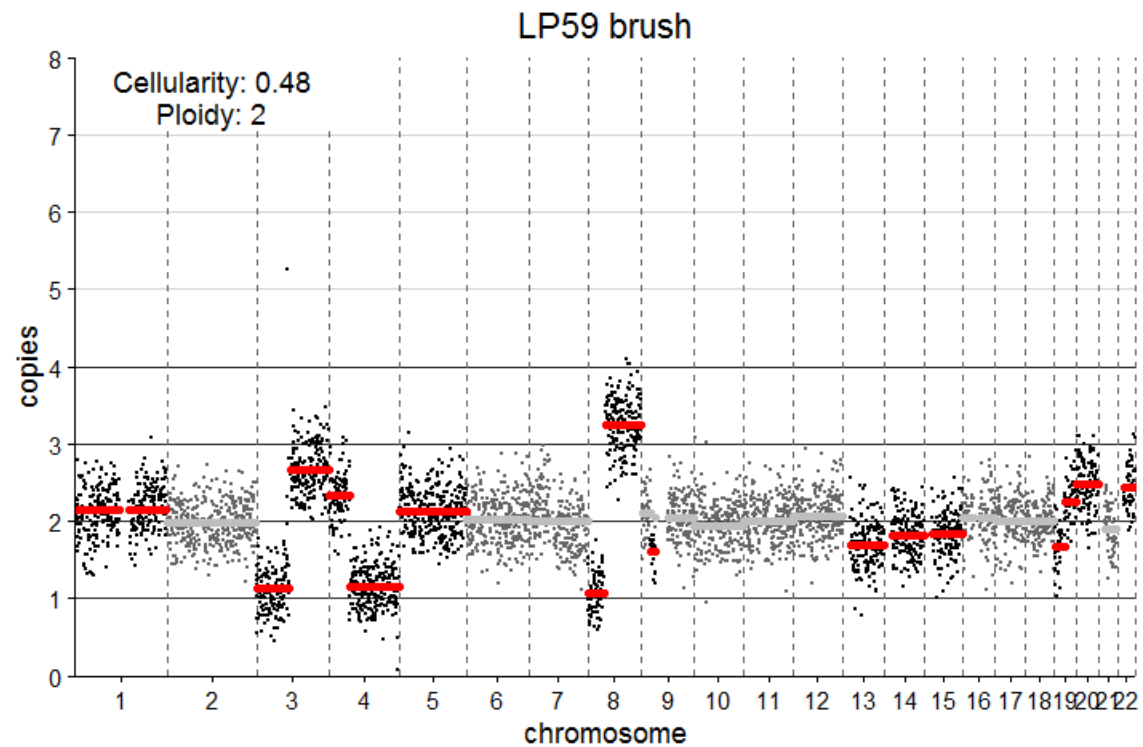

| Sample      | Chr   | Pos       | Gene   | REF | ALT | read depth | ref reads | alt reads | VAF (%) | Change      | Coverage    |      |      |     |
|-------------|-------|-----------|--------|-----|-----|------------|-----------|-----------|---------|-------------|-------------|------|------|-----|
|             |       |           |        |     |     |            |           |           |         |             | Sample      | Mean | Max  | Min |
| LP59-biopsy | chr9  | 139412332 | NOTCH1 | C   | A   | 172        | 160       | 11        | 6.43    | p.Cys438Phe | LP59-biopsy | 195  | 1126 | 9   |
| LP59-biopsy | chr9  | 139412628 | NOTCH1 | C   | A   | 203        | 192       | 11        | 5.42    | p.Gly406Cys |             |      |      |     |
| LP59-biopsy | chr17 | 7577548   | TP53   | C   | T   | 170        | 89        | 80        | 47.34   | p.Gly245Ser |             |      |      |     |
| LP59-brush  | chr3  | 178936091 | PIK3CA | G   | A   | 812        | 702       | 110       | 13.55   | p.Glu545Lys | LP59-brush  | 754  | 1574 | 148 |
| LP59-brush  | chr17 | 7577548   | TP53   | C   | T   | 852        | 467       | 384       | 45.12   | p.Gly245Ser |             |      |      |     |

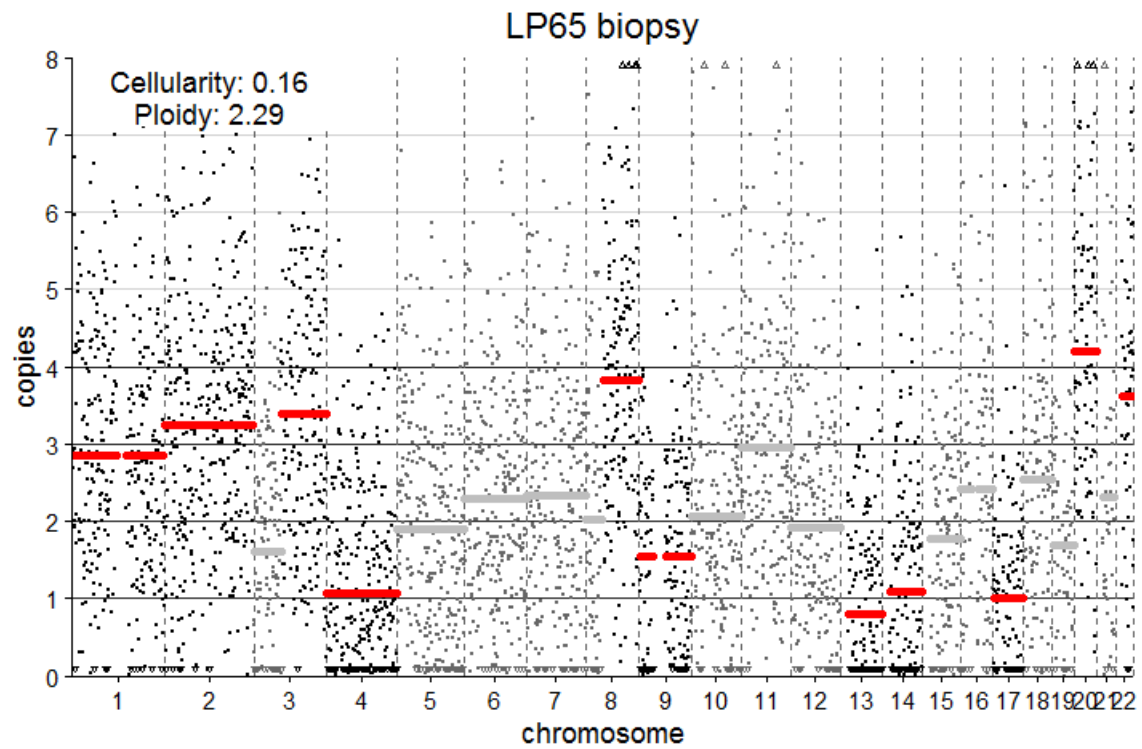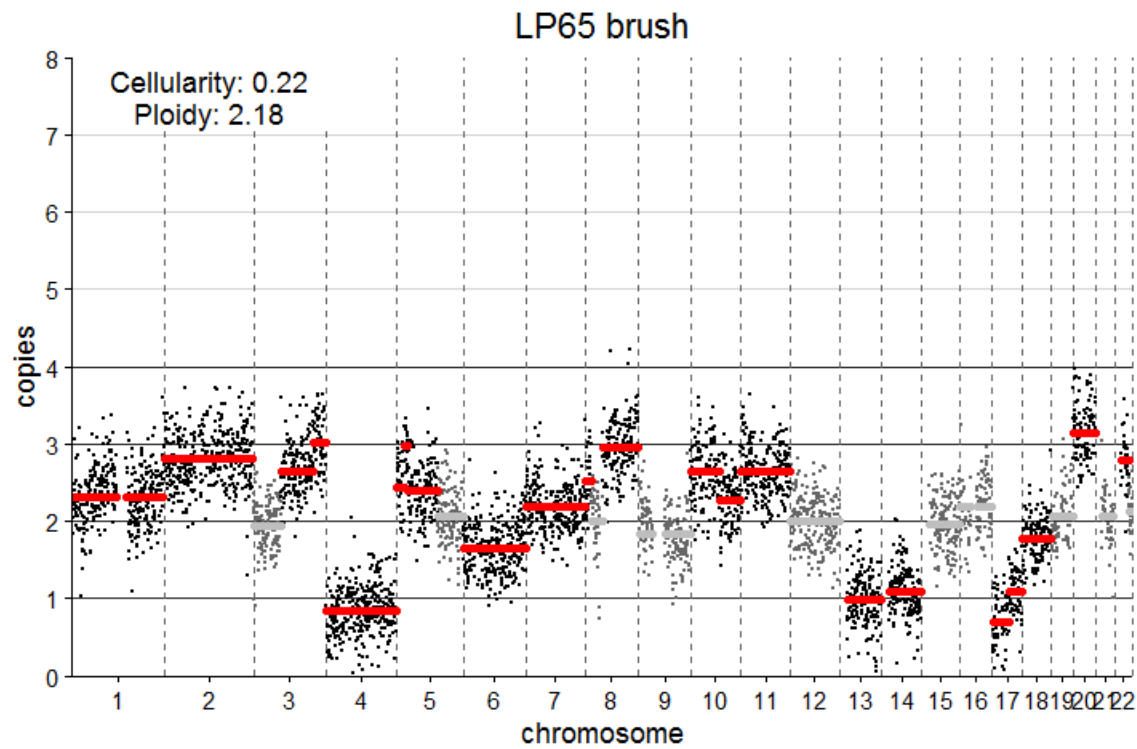

no deep sequencing data

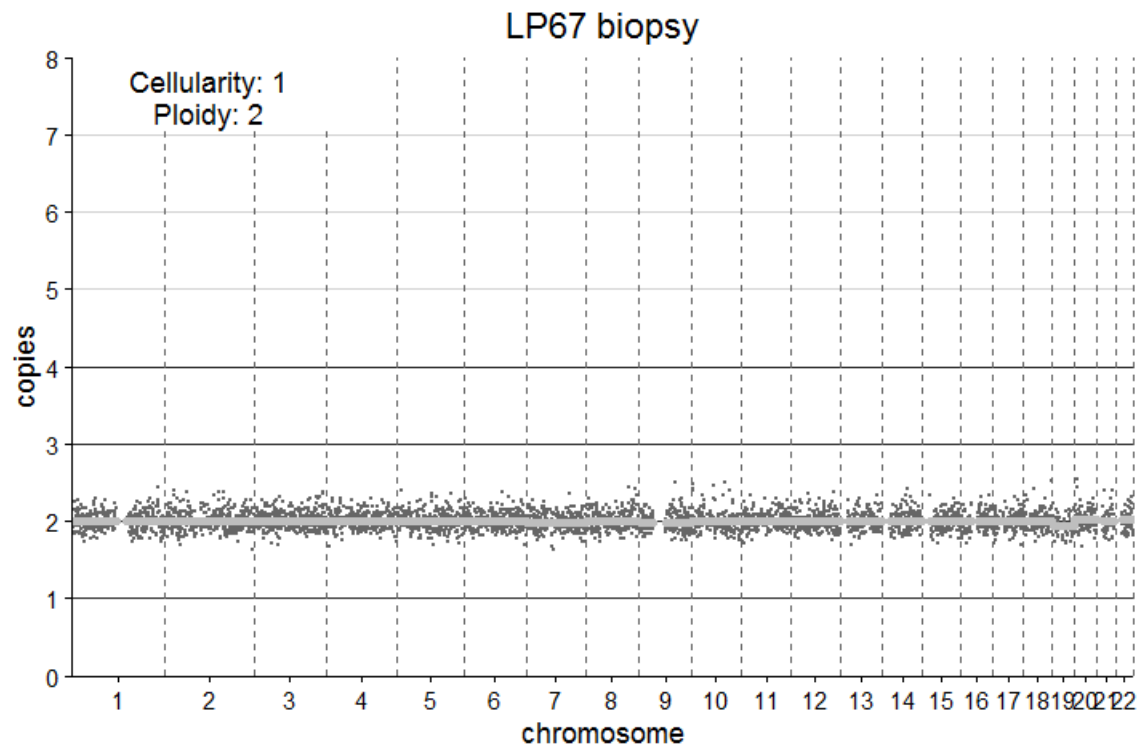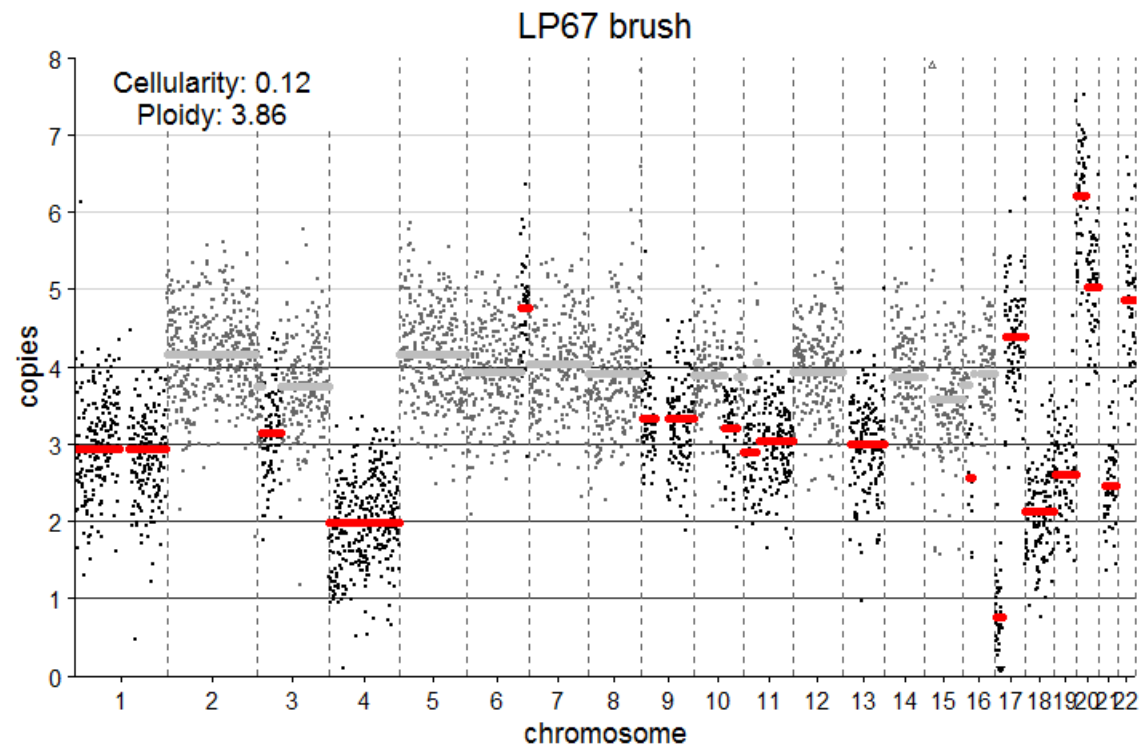

| Sample      | Coverage |      |     |
|-------------|----------|------|-----|
|             | Mean     | Max  | Min |
| LP67-biopsy | 614      | 3217 | 47  |

no deep sequencing data for brush



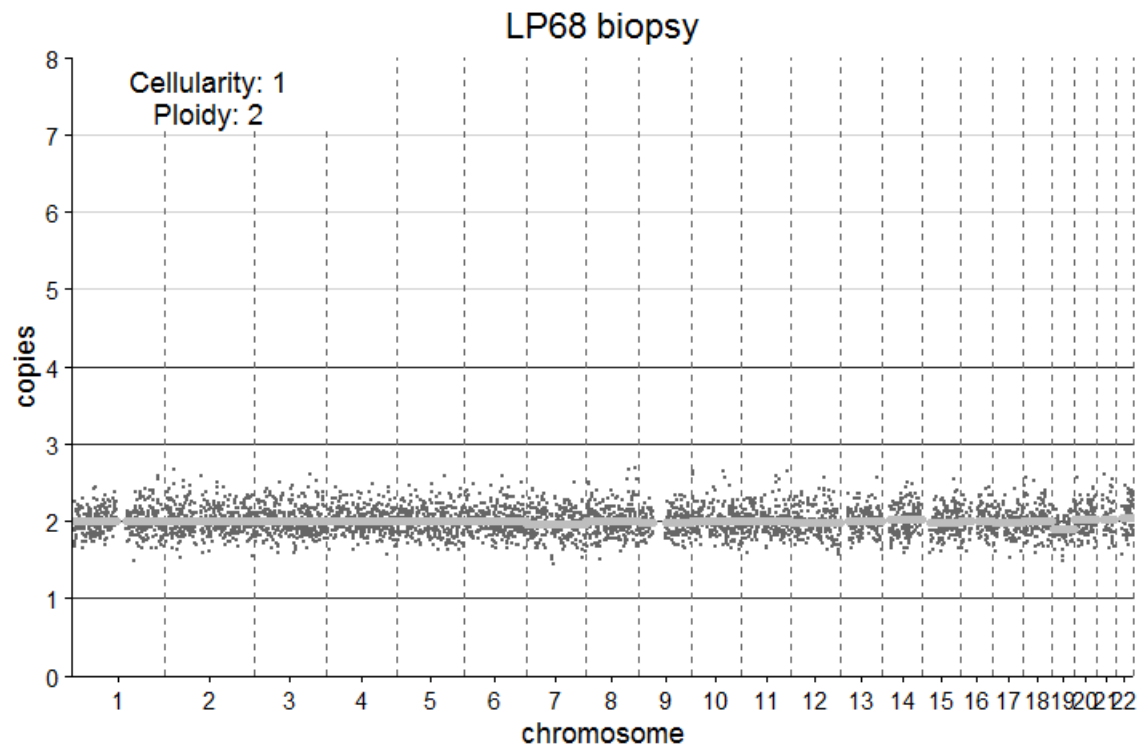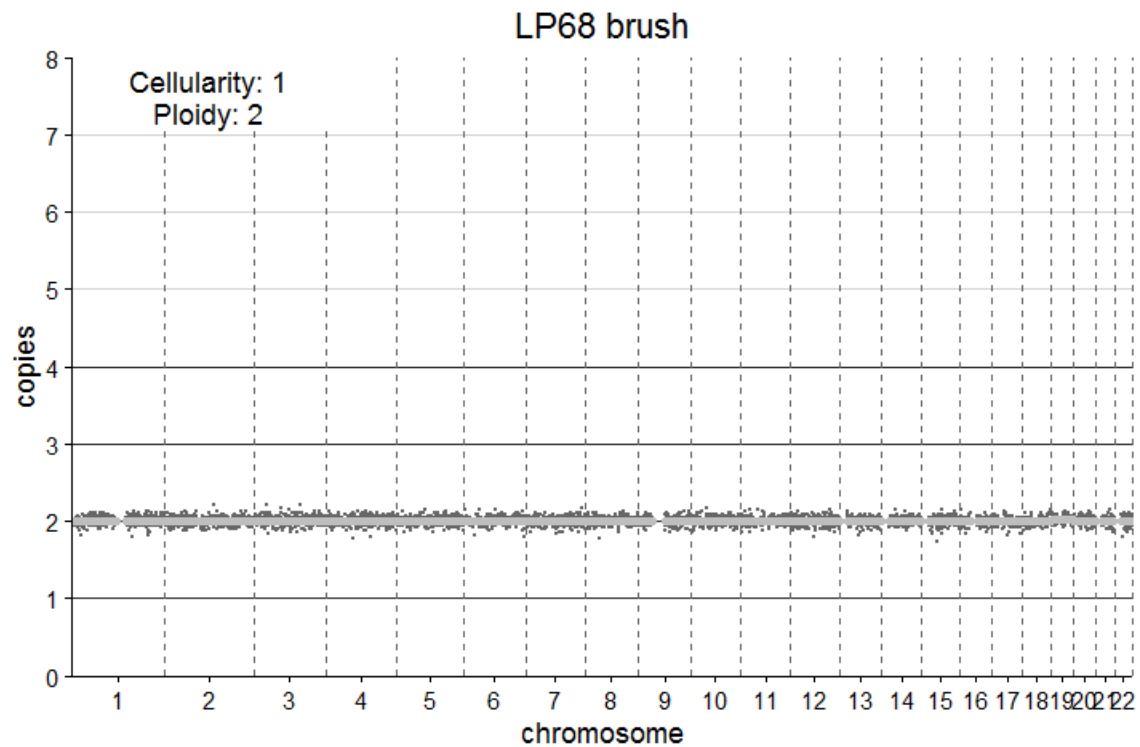

| Sample      | Chr  | Pos       | Gene   | REF | ALT | read depth | ref reads | alt reads | VAF (%) | Change      | Coverage    |      |      |     |
|-------------|------|-----------|--------|-----|-----|------------|-----------|-----------|---------|-------------|-------------|------|------|-----|
|             |      |           |        |     |     |            |           |           |         |             | Sample      | Mean | Max  | Min |
| LP68-biopsy | chr3 | 178936092 | PIK3CA | A   | G   | 247        | 214       | 33        | 13.36   | p.Glu545Gly | LP68-biopsy | 254  | 1706 | 17  |
| LP68-brush  | chr3 | 178936092 | PIK3CA | A   | G   | 2217       | 2037      | 180       | 8.12    | p.Glu545Gly | LP68-brush  | 2693 | 3305 | 101 |
