# Supplementary material for: Oral cancer prediction by noninvasive genetic screening
Source: PubMed Central journal article supplement — Int J Cancer. 2022 Sep 18;152(2):227–38. doi: 10.1002/ijc.34277 (PMC9826173; doi:10.1002/ijc.34277), 2022-09-18
Supplement: IJC-152-227-s003.pdf [file IJC-152-227-s003.pdf]

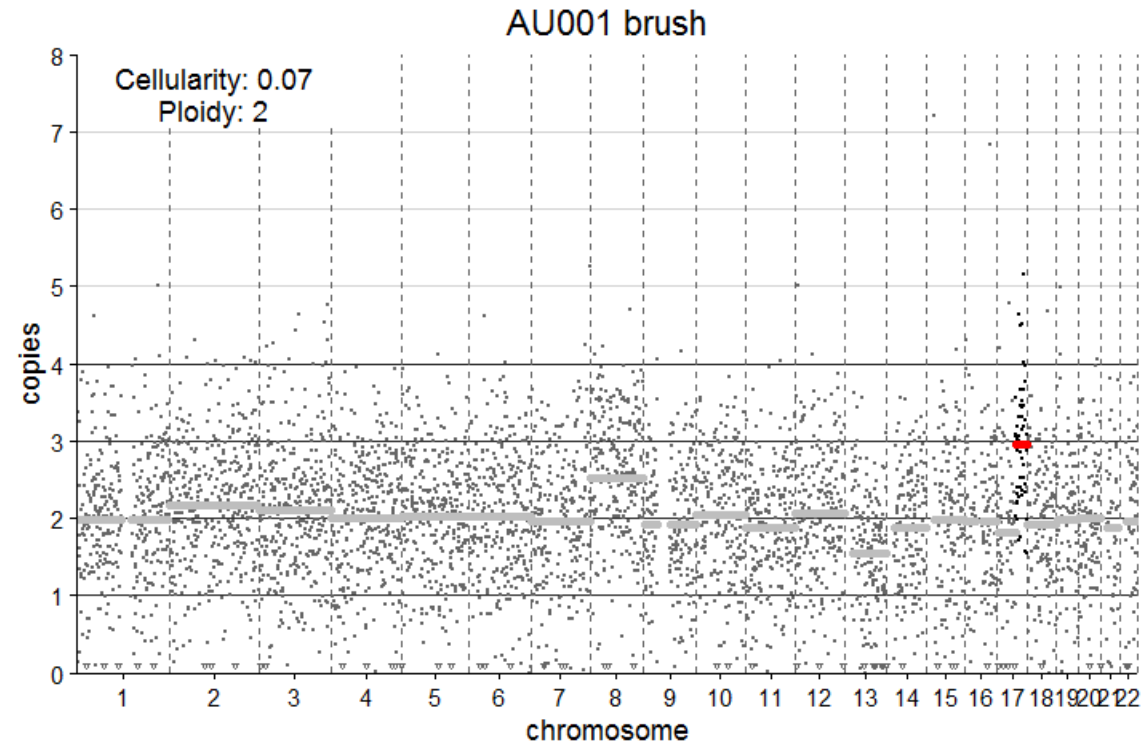

| Sample | Chr   | Pos     | Gene | REF | ALT | read depth | ref reads | alt reads | VAF (%) | Change      | Sample | Coverage |      |     |
|--------|-------|---------|------|-----|-----|------------|-----------|-----------|---------|-------------|--------|----------|------|-----|
|        |       |         |      |     |     |            |           |           |         |             |        | Mean     | Max  | Min |
| AU001  | chr17 | 7578526 | TP53 | C   | A   | 2661       | 2577      | 83        | 3.12    | p.Cys135Phe | AU001  | 2497     | 3497 | 432 |

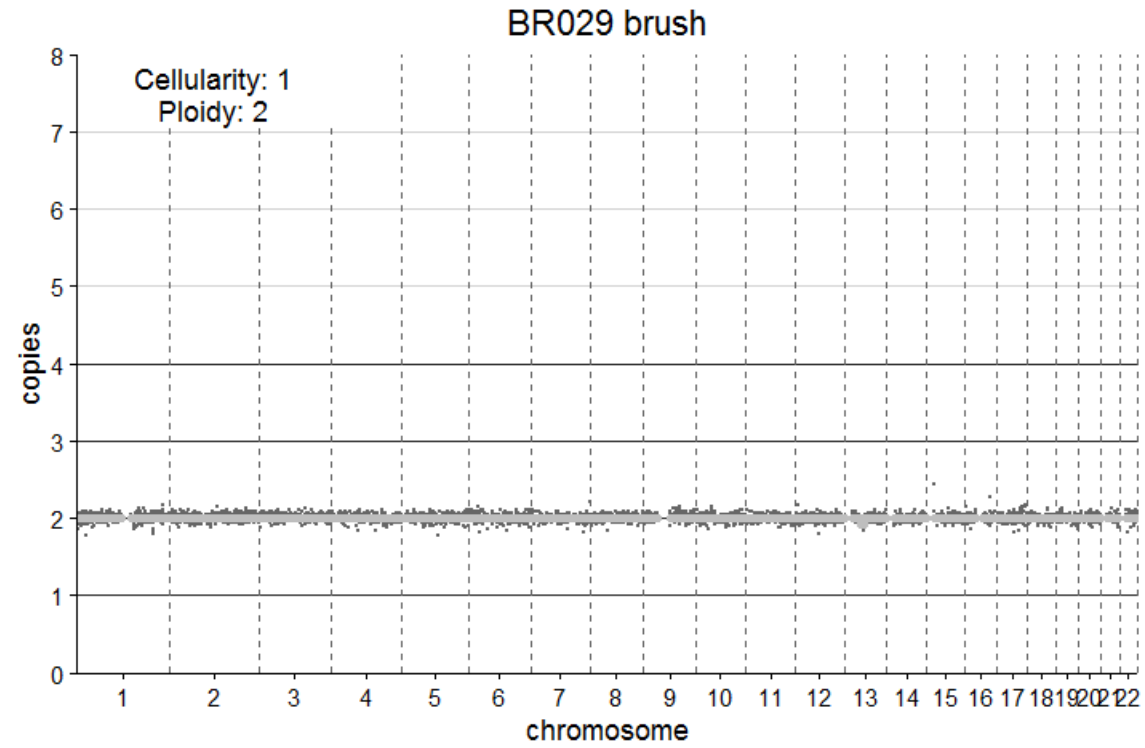

| Sample | Chr   | Pos      | Gene  | REF  | ALT | read depth | ref reads | alt reads | VAF (%) | Change             | Coverage |      |      |     |
|--------|-------|----------|-------|------|-----|------------|-----------|-----------|---------|--------------------|----------|------|------|-----|
|        |       |          |       |      |     |            |           |           |         |                    | Sample   | Mean | Max  | Min |
| BR029  | chr12 | 49445156 | KMT2D | C..T | C   | 1724       | 1380      | 344       | 19.95   | p.Ser762_Leu770del | BR029    | 2056 | 3538 | 433 |
| BR029  | chr12 | 49445175 | KMT2D | T    | C   | 1176       | 1048      | 91        | 7.99    | p.Gln764Arg        |          |      |      |     |

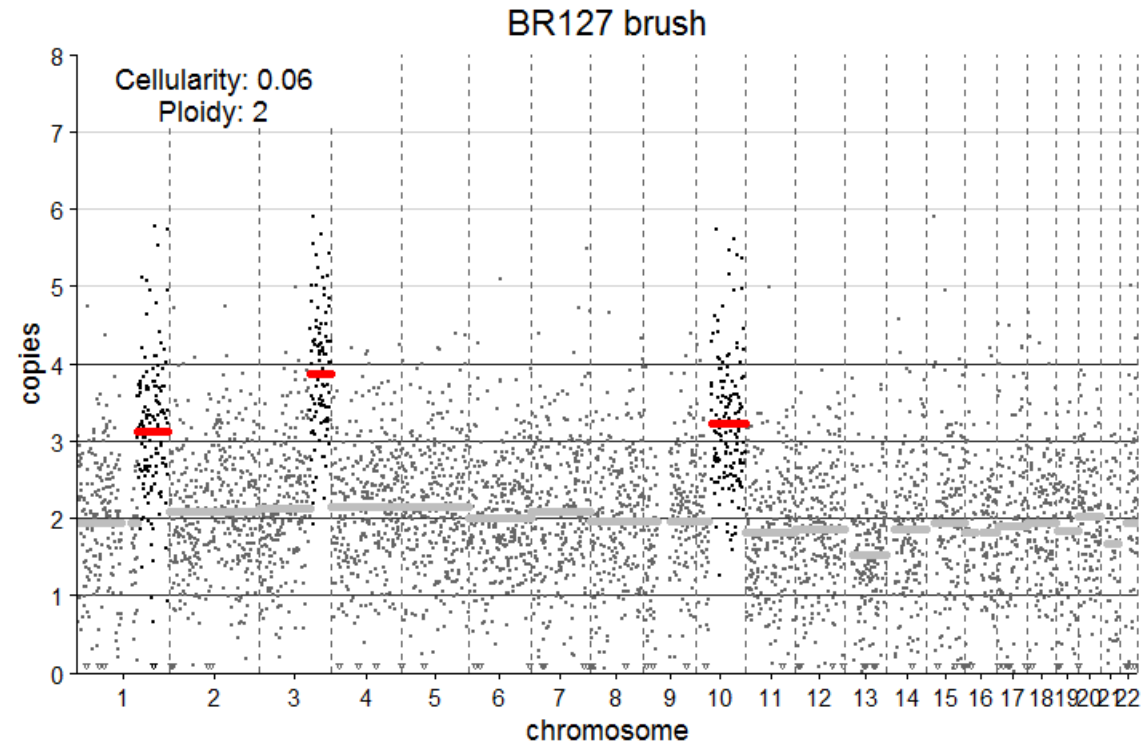

| Sample | Chr   | Pos      | Gene  | REF  | ALT | read depth | ref reads | alt reads | VAF (%) | Change            | Sample | Coverage |      |     |
|--------|-------|----------|-------|------|-----|------------|-----------|-----------|---------|-------------------|--------|----------|------|-----|
|        |       |          |       |      |     |            |           |           |         |                   |        | Mean     | Max  | Min |
| BR127  | chr12 | 49426587 | KMT2D | T..C | T   | 1448       | 1366      | 83        | 5.73    | p.Phe3966_3967del | BR127  | 1312     | 3614 | 486 |

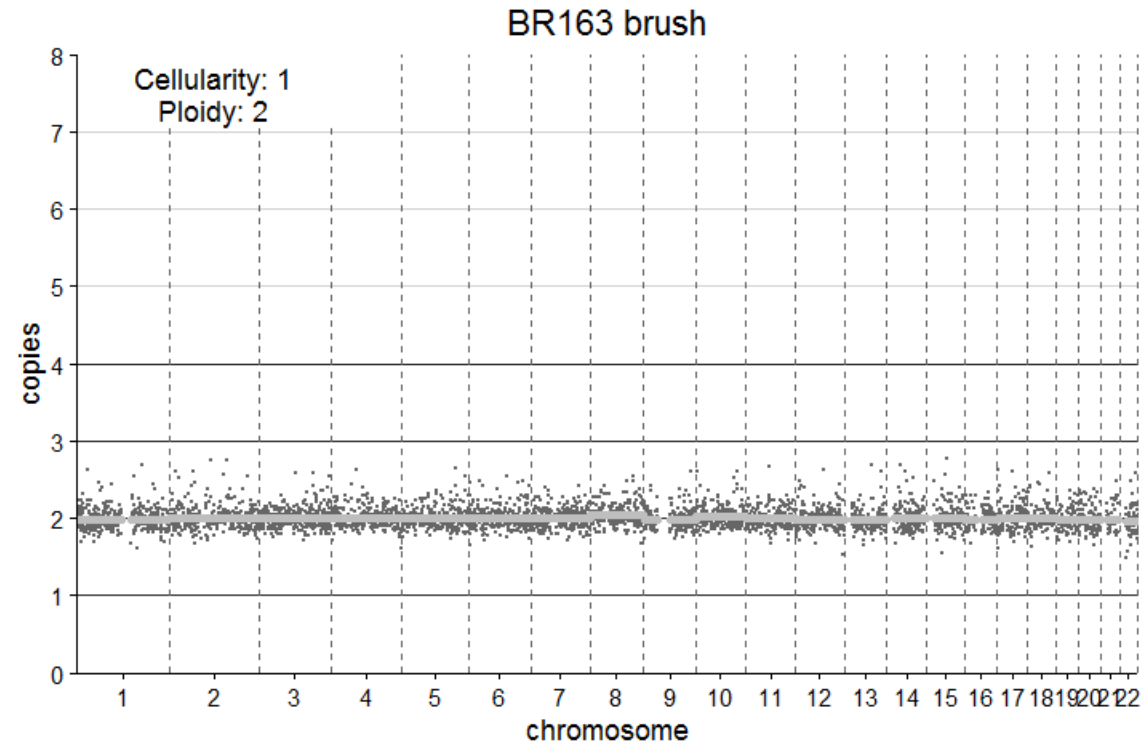

| Sample | Chr | Pos | Gene | REF | ALT | read depth | ref reads | alt reads | VAF (%) | Change |
|--------|-----|-----|------|-----|-----|------------|-----------|-----------|---------|--------|
|--------|-----|-----|------|-----|-----|------------|-----------|-----------|---------|--------|

| Sample | Coverage |      |     |
|--------|----------|------|-----|
|        | Mean     | Max  | Min |
| BR163  | 673      | 1766 | 282 |

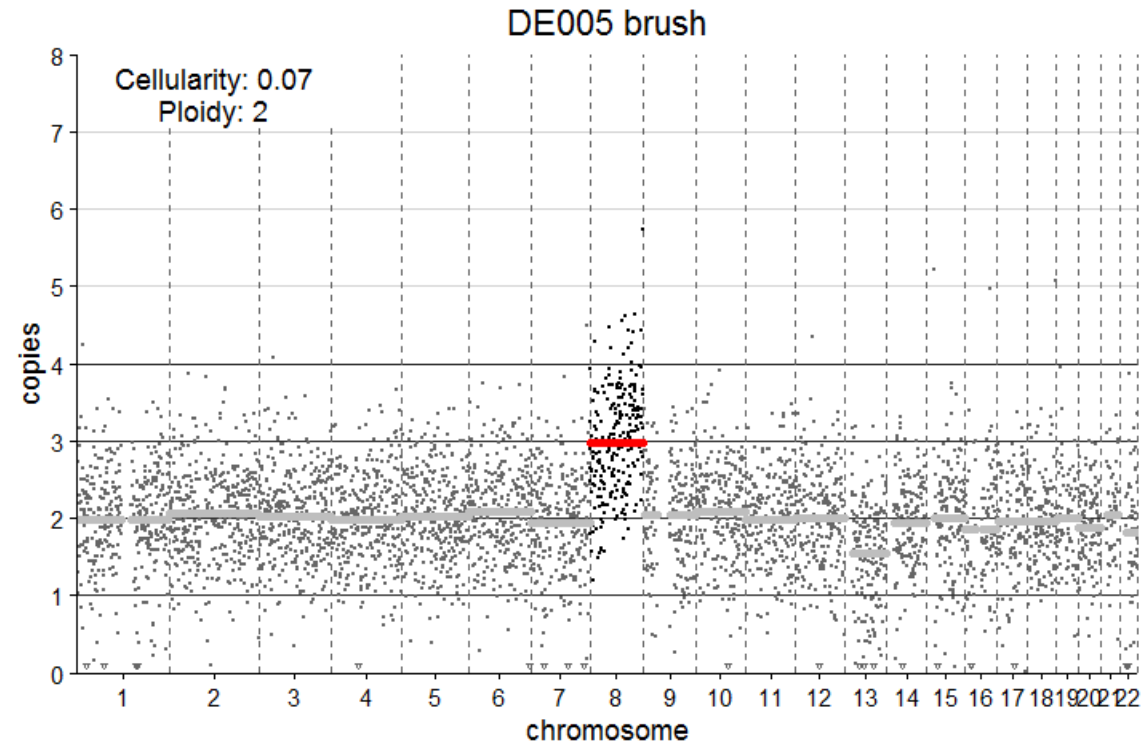

| Sample | Chr | Pos | Gene | REF | ALT | read depth | ref reads | alt reads | VAF (%) | Change | Coverage |      |      |     |
|--------|-----|-----|------|-----|-----|------------|-----------|-----------|---------|--------|----------|------|------|-----|
|        |     |     |      |     |     |            |           |           |         |        | Sample   | Mean | Max  | Min |
| DE005  |     |     |      |     |     |            |           |           |         |        | DE005    | 2653 | 4309 | 387 |

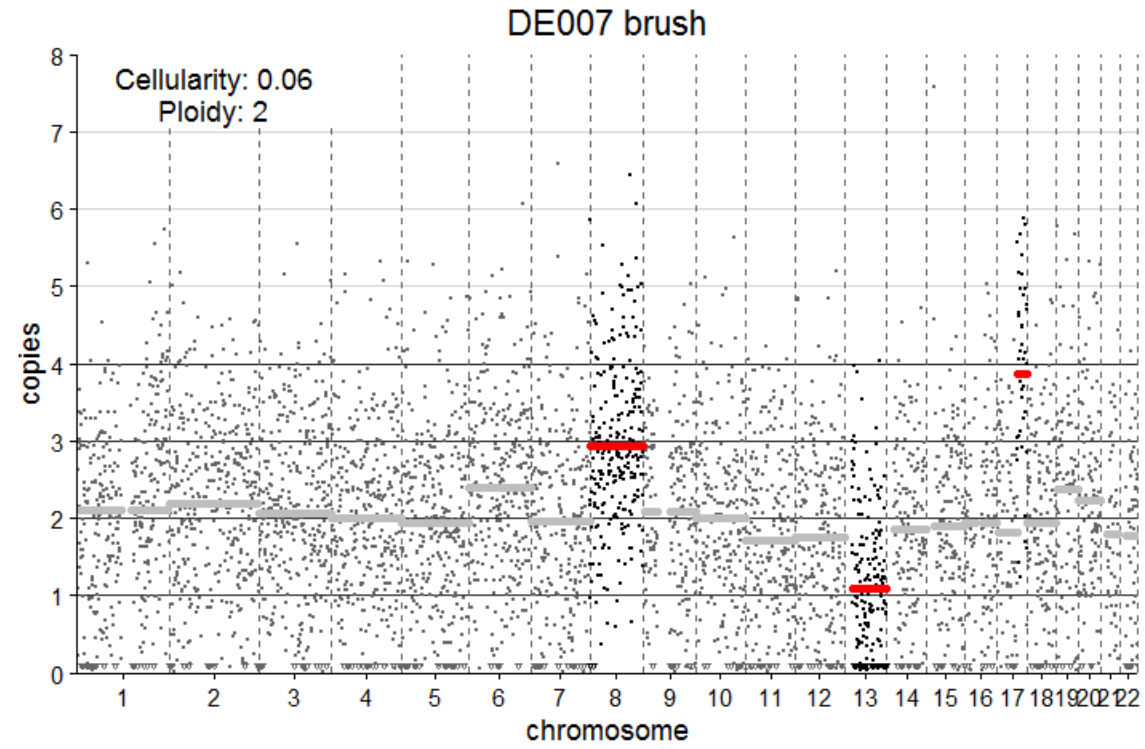

| Sample | Chr | Pos | Gene | REF | ALT | read depth | ref reads | alt reads | VAF (%) | Change | Coverage |      |     |
|--------|-----|-----|------|-----|-----|------------|-----------|-----------|---------|--------|----------|------|-----|
|        |     |     |      |     |     |            |           |           |         |        | Sample   | Mean | Max |
| DE007  |     |     |      |     |     |            |           |           |         |        | 2068     | 2890 | 323 |

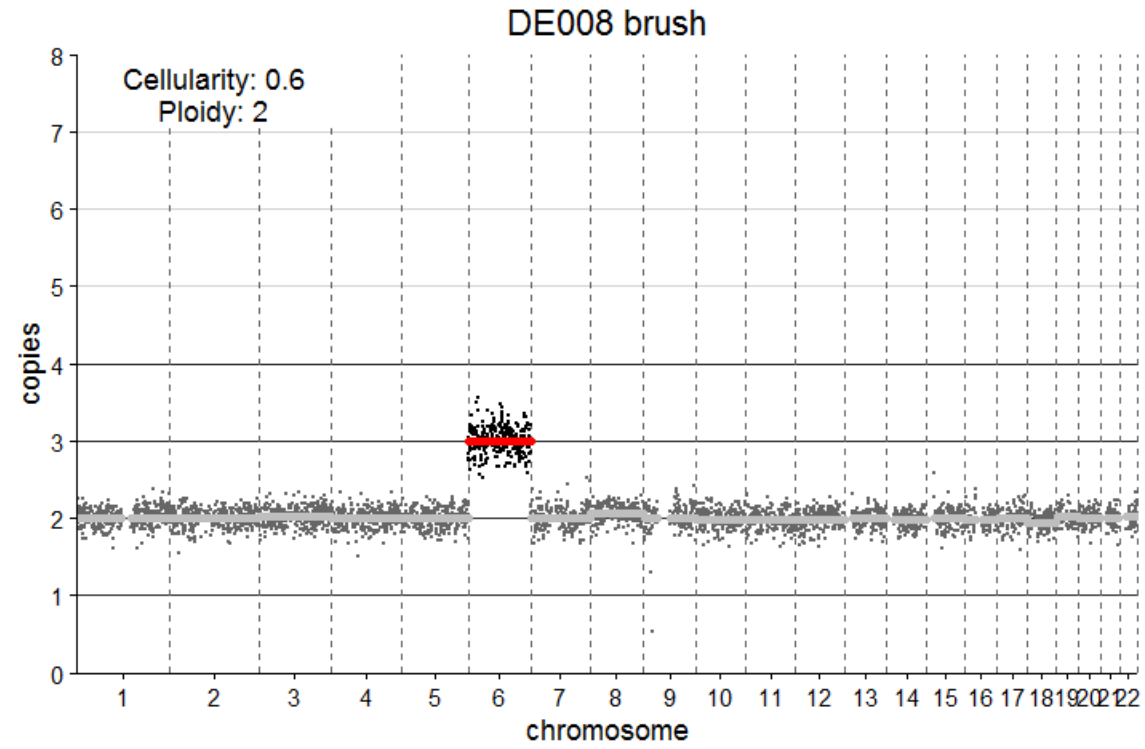

| Sample | Chr | Pos | Gene | REF | ALT | read depth | ref reads | alt reads | VOF (%) | Change |
|--------|-----|-----|------|-----|-----|------------|-----------|-----------|---------|--------|
|--------|-----|-----|------|-----|-----|------------|-----------|-----------|---------|--------|

| Sample | Coverage |      |     |
|--------|----------|------|-----|
|        | Mean     | Max  | Min |
| DE008  | 930      | 4807 | 322 |

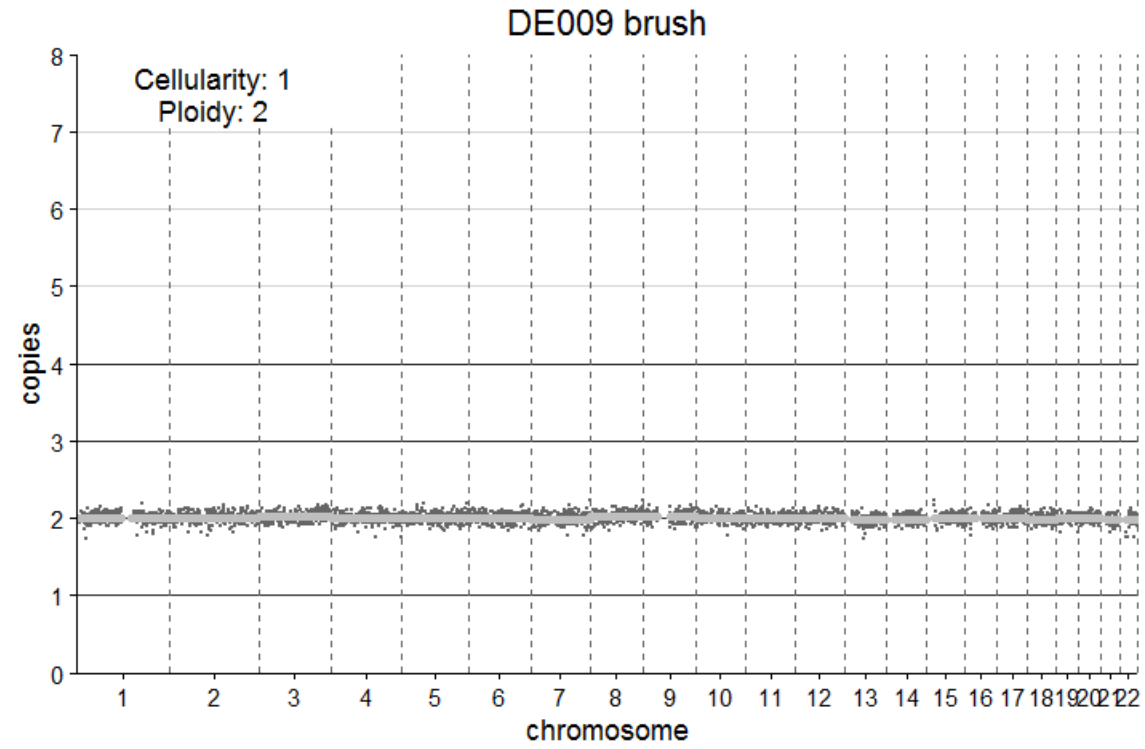

| Sample | Chr | Pos | Gene | REF | ALT | read depth | ref reads | alt reads | VAF (%) | Change | Coverage |      |     |
|--------|-----|-----|------|-----|-----|------------|-----------|-----------|---------|--------|----------|------|-----|
|        |     |     |      |     |     |            |           |           |         |        | Sample   | Mean | Max |
| DE009  |     |     |      |     |     |            |           |           |         |        | 2181     | 3542 | 372 |



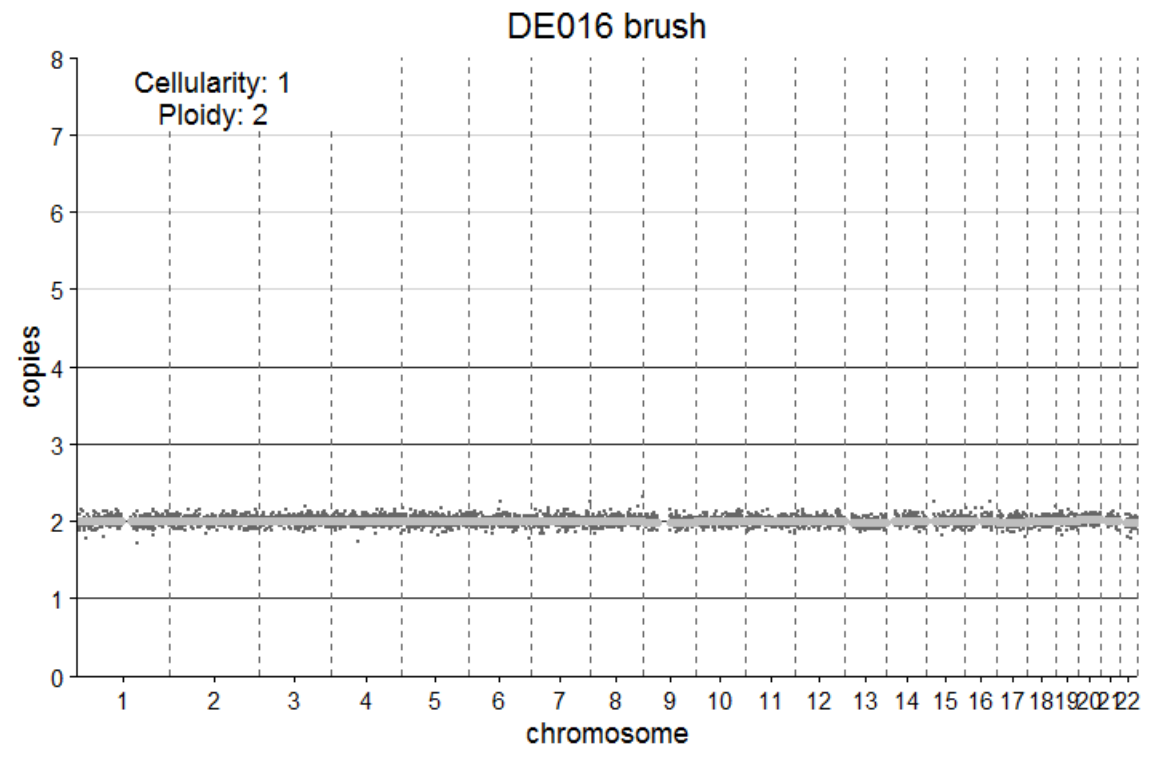

| Sample | Chr | Pos | Gene | REF | ALT | read depth | ref reads | alt reads | VAF (%) | Change | Coverage |      |     |
|--------|-----|-----|------|-----|-----|------------|-----------|-----------|---------|--------|----------|------|-----|
|        |     |     |      |     |     |            |           |           |         |        | Sample   | Mean | Max |
| DE016  |     |     |      |     |     |            |           |           |         |        | 923      | 1376 | 147 |

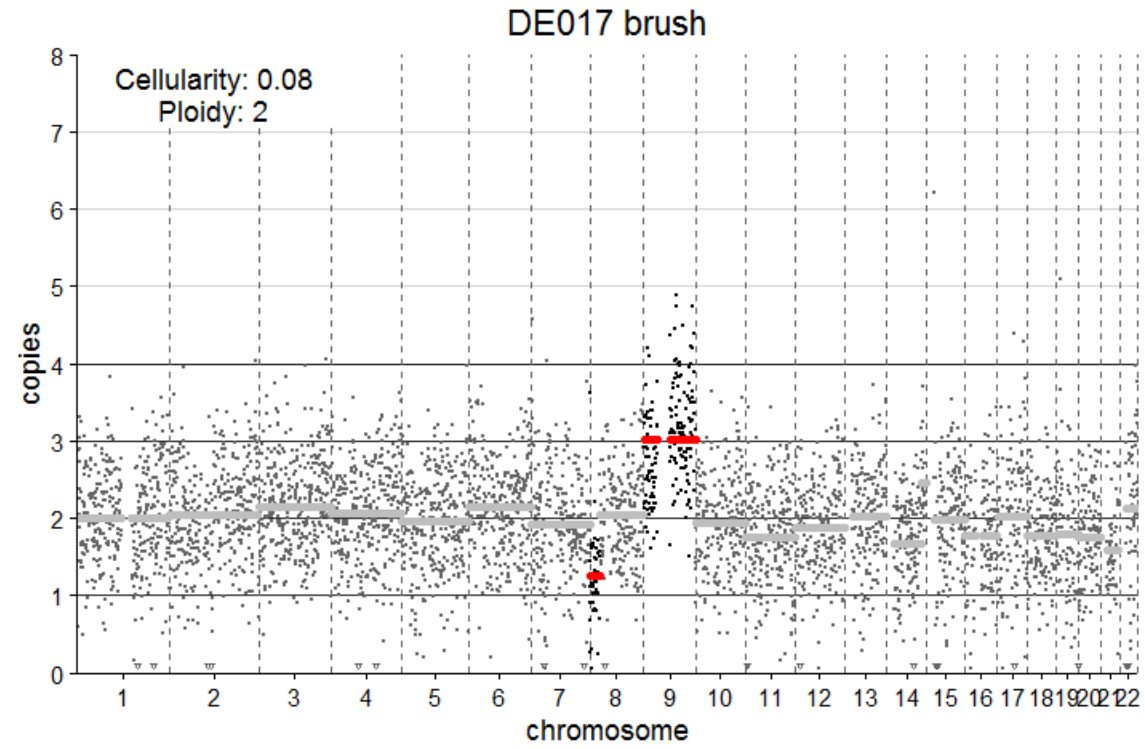

| Sample | Chr | Pos | Gene | REF | ALT | read depth | ref reads | alt reads | VAF (%) | Change | Coverage |      |      |     |
|--------|-----|-----|------|-----|-----|------------|-----------|-----------|---------|--------|----------|------|------|-----|
|        |     |     |      |     |     |            |           |           |         |        | Sample   | Mean | Max  | Min |
| DE017  |     |     |      |     |     |            |           |           |         |        |          | 2541 | 6356 | 865 |

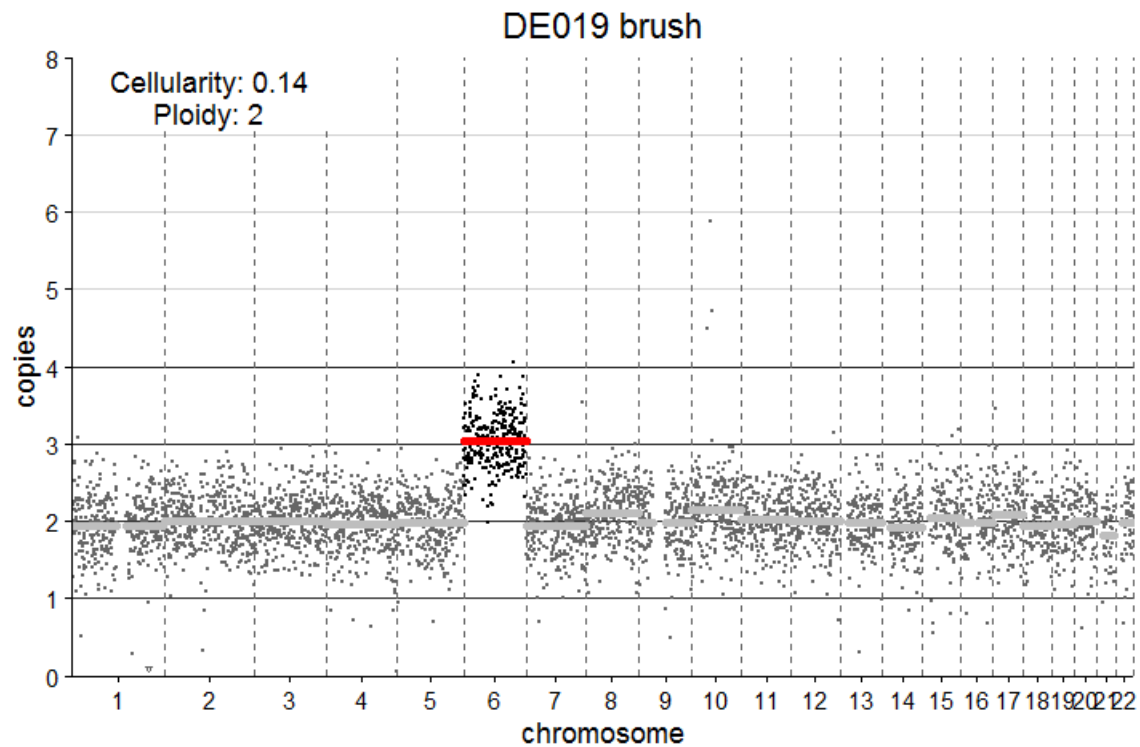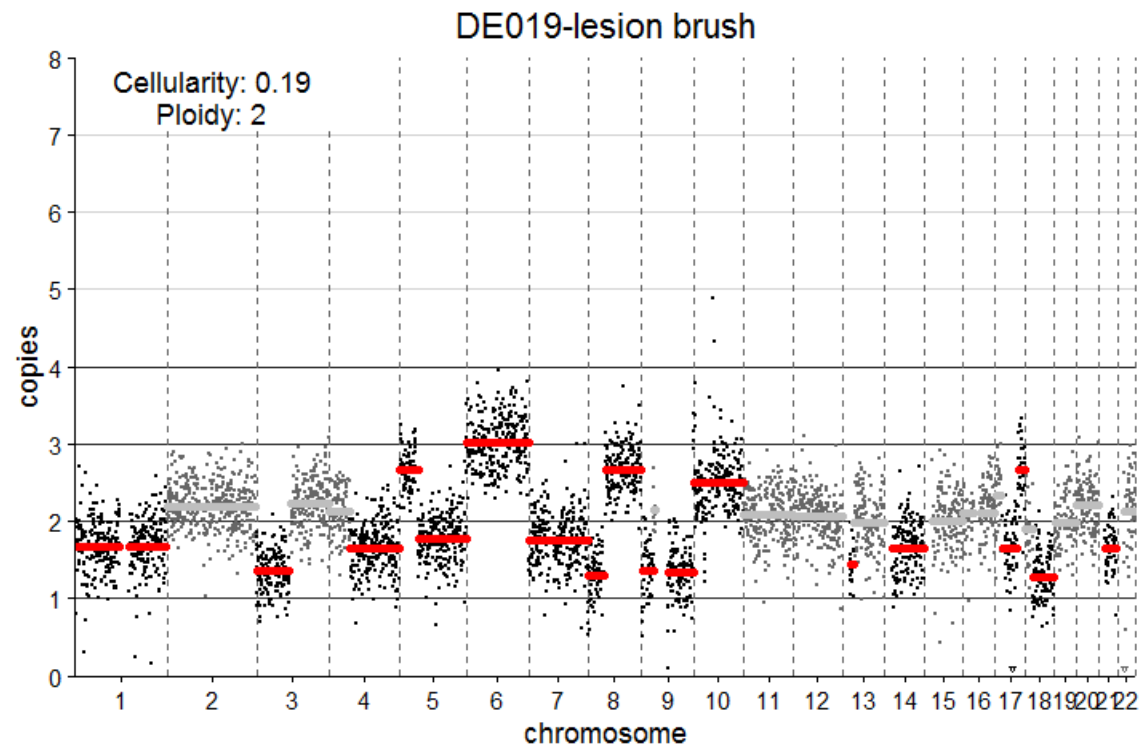

| Sample       | Chr   | Pos       | Gene   | REF | ALT | read depth | ref reads | alt reads | VAF (%) | Change      | Coverage     |      |      |     |
|--------------|-------|-----------|--------|-----|-----|------------|-----------|-----------|---------|-------------|--------------|------|------|-----|
|              |       |           |        |     |     |            |           |           |         |             | Sample       | Mean | Max  | Min |
| DE019        | chr9  | 139412350 | NOTCH1 | G   | A   | 2785       | 2679      | 106       | 3.81    | p.Thr432Met | DE019        | 3187 | 5572 | 547 |
| DE019-lesion | chr4  | 187549878 | FAT1   | G   | A   | 5062       | 4887      | 175       | 3.46    | p.Gln1455*  | DE019-lesion | 5667 | 8211 | 553 |
| DE019-lesion | chr9  | 21971108  | CDKN2A | C   | T   | 2881       | 2551      | 329       | 11.42   | p.Asp84Asn  |              |      |      |     |
| DE019-lesion | chr9  | 21971186  | CDKN2A | G   | A   | 1764       | 1658      | 105       | 5.96    | p.Arg58*    |              |      |      |     |
| DE019-lesion | chr9  | 139412350 | NOTCH1 | G   | A   | 4330       | 3801      | 529       | 12.22   | p.Thr432Met |              |      |      |     |
| DE019-lesion | chr17 | 7578200   | TP53   | CCA | C   | 5490       | 4853      | 638       | 11.62   | p.Val216fs  |              |      |      |     |

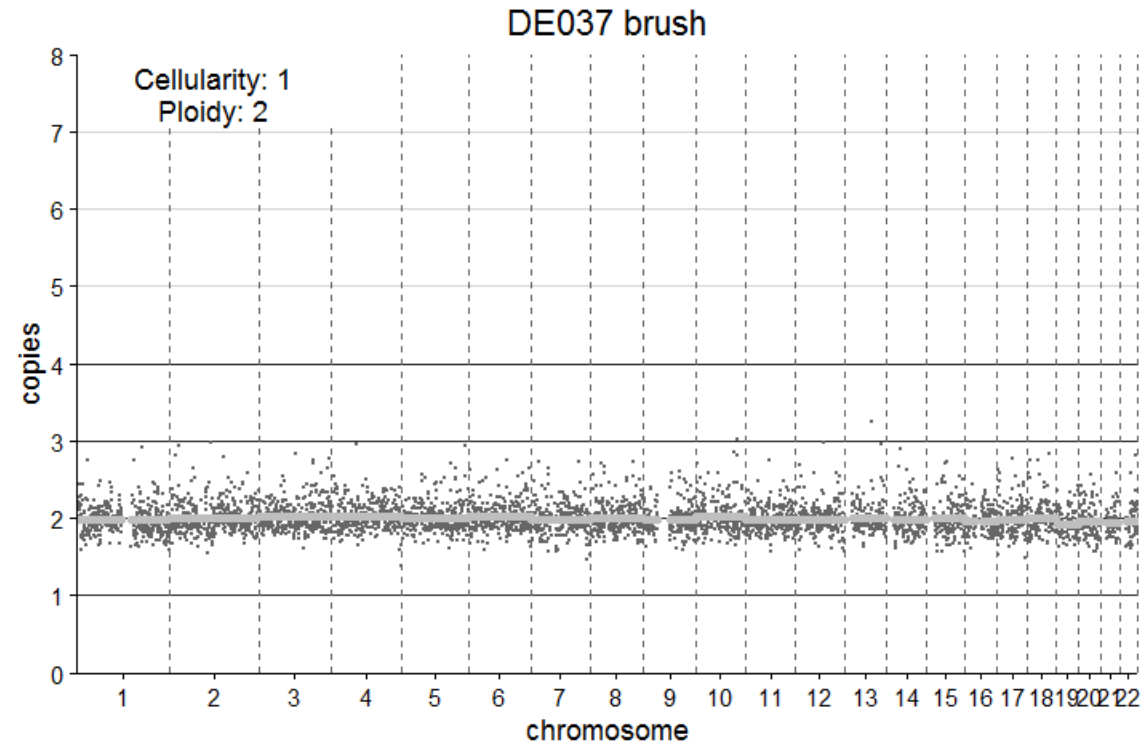

| Sample | Chr | Pos | Gene | REF | ALT | read depth | ref reads | alt reads | VAF (%) | Change | Coverage |      |     |
|--------|-----|-----|------|-----|-----|------------|-----------|-----------|---------|--------|----------|------|-----|
|        |     |     |      |     |     |            |           |           |         |        | Mean     | Max  | Min |
| DE037  |     |     |      |     |     |            |           |           |         |        | 1234     | 2860 | 248 |

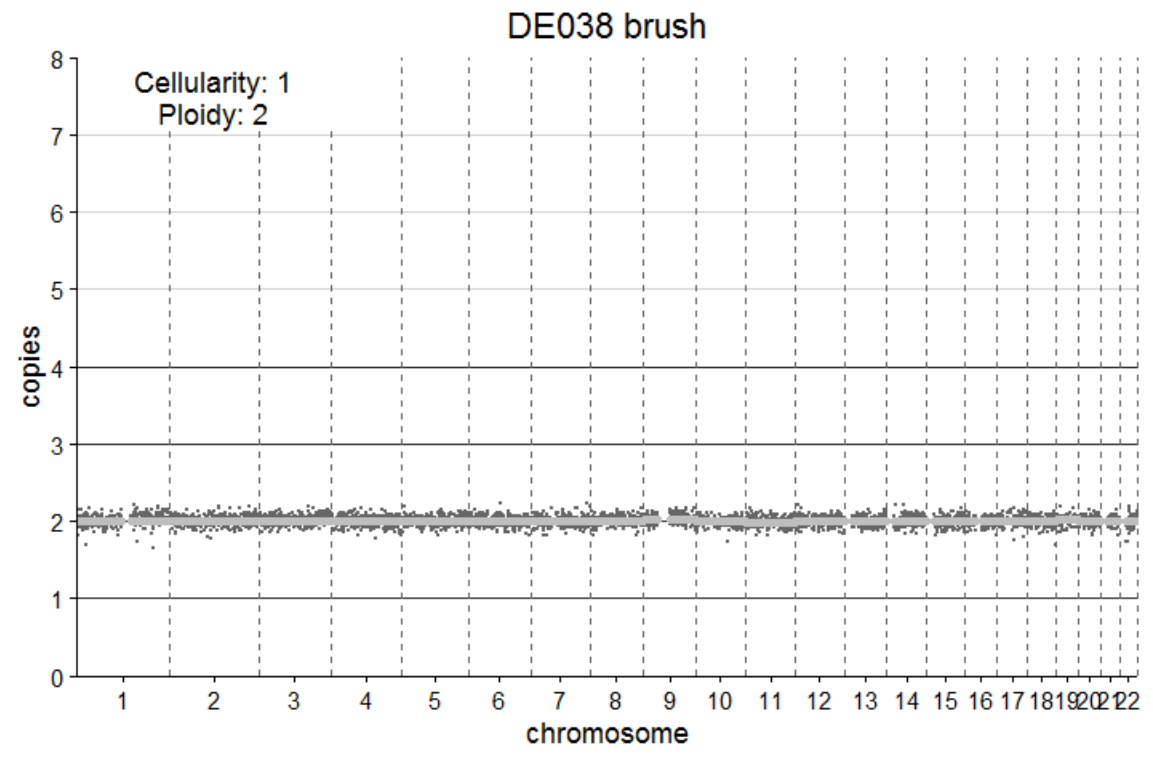

| Sample | Chr | Pos | Gene | REF | ALT | read depth | ref reads | alt reads | VAF (%) | Change | Coverage |      |     |
|--------|-----|-----|------|-----|-----|------------|-----------|-----------|---------|--------|----------|------|-----|
|        |     |     |      |     |     |            |           |           |         |        | Sample   | Mean | Max |
| DE038  |     |     |      |     |     |            |           |           |         |        | 6645     | 9475 | 526 |

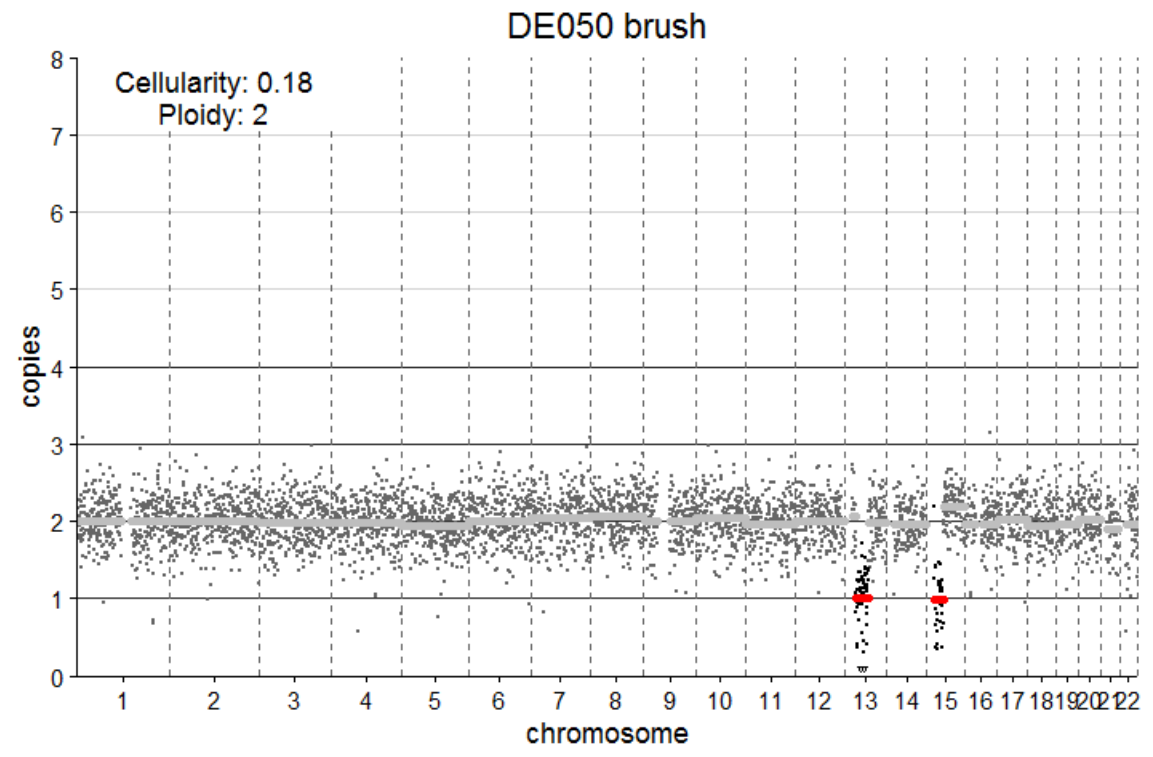

| Sample | Chr | Pos | Gene | REF | ALT | read depth | ref reads | alt reads | VAF (%) | Change | Coverage |      |      |     |
|--------|-----|-----|------|-----|-----|------------|-----------|-----------|---------|--------|----------|------|------|-----|
|        |     |     |      |     |     |            |           |           |         |        | Sample   | Mean | Max  | Min |
| DE050  |     |     |      |     |     |            |           |           |         |        | DE050    | 2699 | 3737 | 514 |

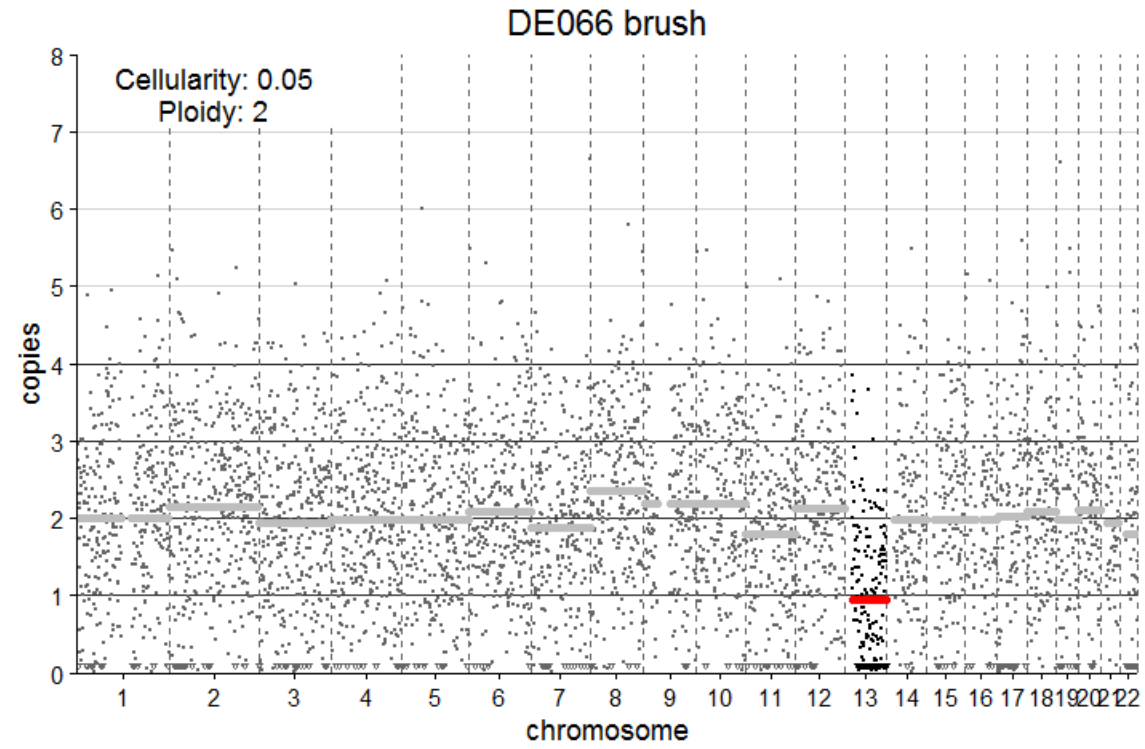

| Sample | Chr | Pos | Gene | REF | ALT | read depth | ref reads | alt reads | VAF (%) | Change | Coverage |      |      |     |
|--------|-----|-----|------|-----|-----|------------|-----------|-----------|---------|--------|----------|------|------|-----|
|        |     |     |      |     |     |            |           |           |         |        | Sample   | Mean | Max  | Min |
| DE066  |     |     |      |     |     |            |           |           |         |        | DE066    | 2821 | 4680 | 459 |

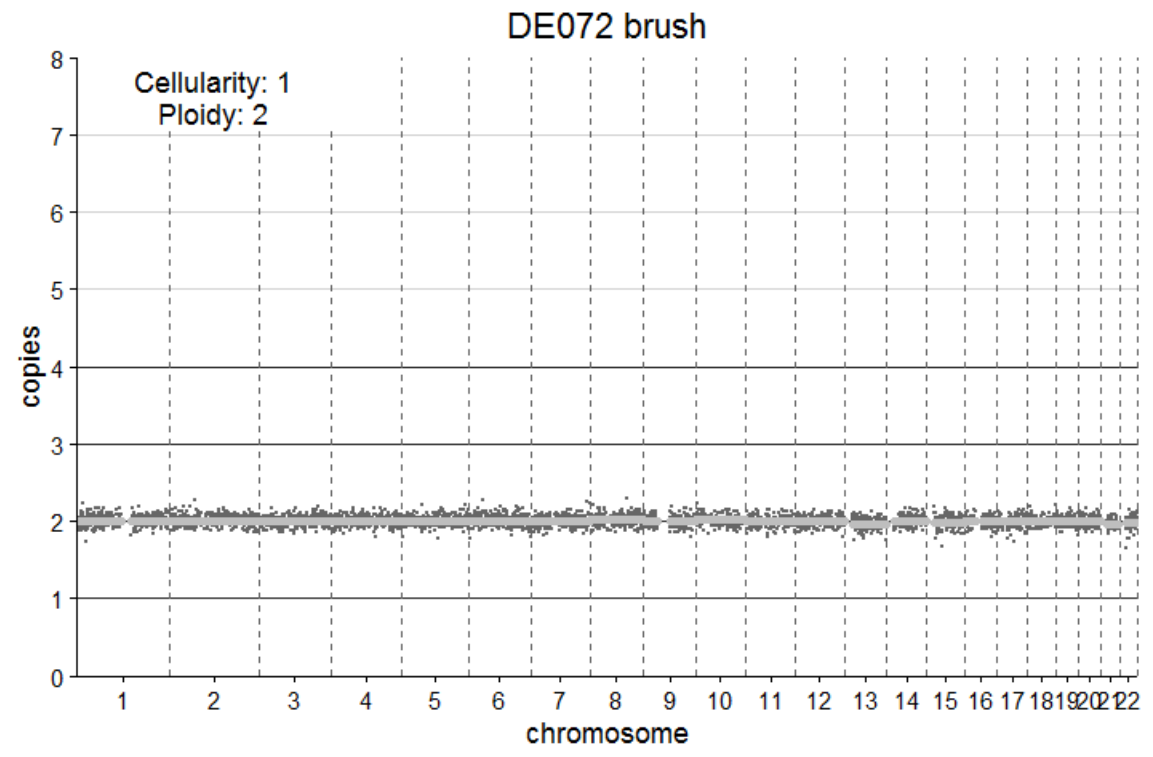

| Sample | Chr | Pos | Gene | REF | ALT | read depth | ref reads | alt reads | VAF (%) | Change | Sample | Coverage |      |     |
|--------|-----|-----|------|-----|-----|------------|-----------|-----------|---------|--------|--------|----------|------|-----|
|        |     |     |      |     |     |            |           |           |         |        |        | Mean     | Max  | Min |
| DE072  |     |     |      |     |     |            |           |           |         |        | DE072  | 3751     | 5385 | 473 |



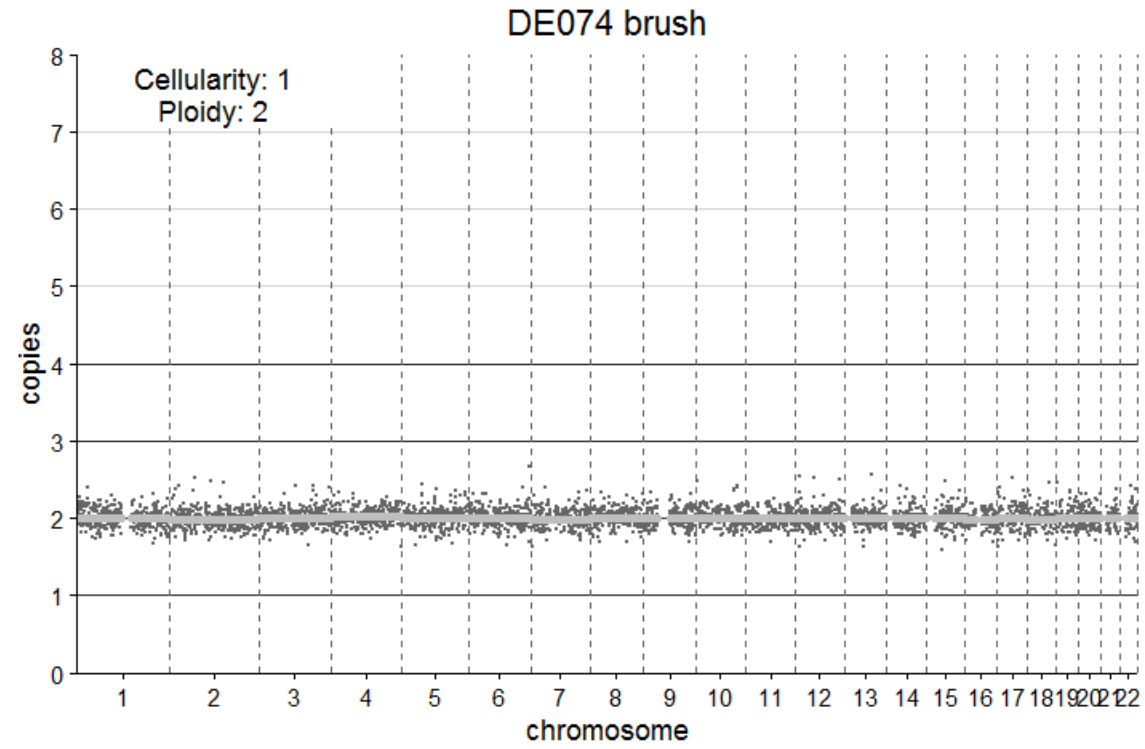

| Sample | Chr | Pos | Gene | REF | ALT | read depth | ref reads | alt reads | VAF (%) | Change | Coverage |      |      |     |
|--------|-----|-----|------|-----|-----|------------|-----------|-----------|---------|--------|----------|------|------|-----|
|        |     |     |      |     |     |            |           |           |         |        | Sample   | Mean | Max  | Min |
| DE074  |     |     |      |     |     |            |           |           |         |        | DE074    | 672  | 2468 | 192 |

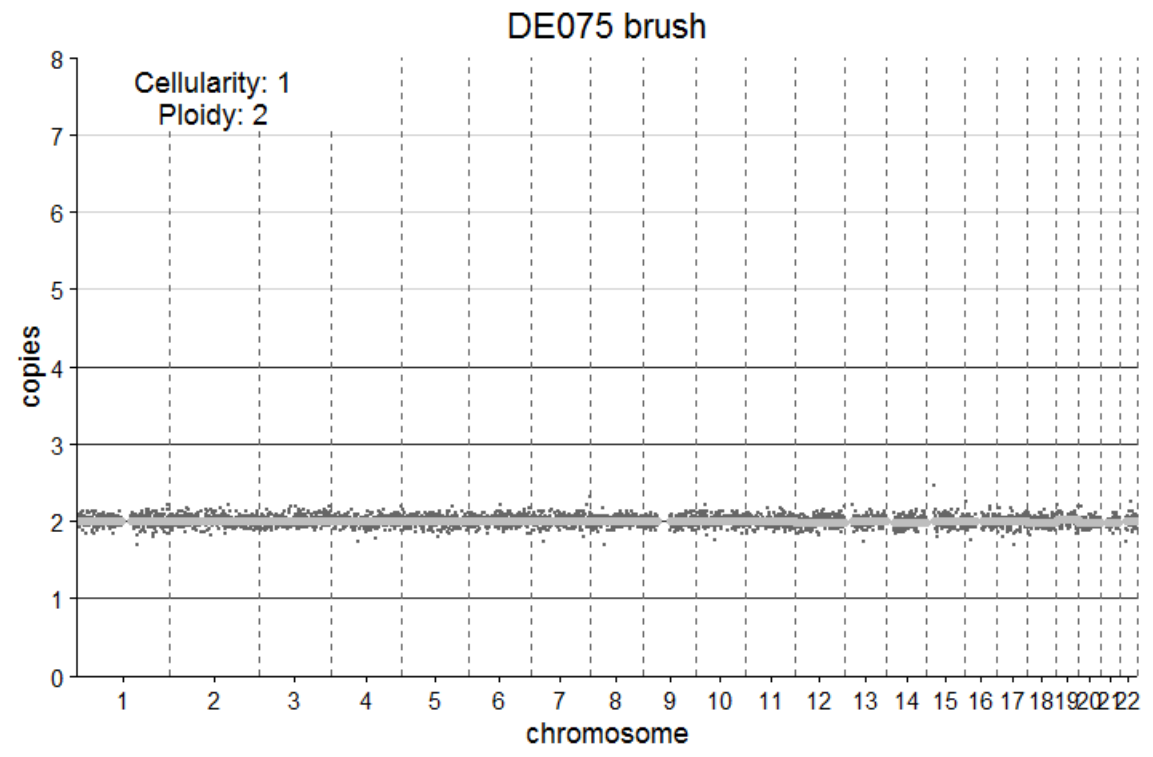

| Sample | Chr | Pos | Gene | REF | ALT | read depth | ref reads | alt reads | VAF (%) | Change | Coverage |      |      |     |
|--------|-----|-----|------|-----|-----|------------|-----------|-----------|---------|--------|----------|------|------|-----|
|        |     |     |      |     |     |            |           |           |         |        | Sample   | Mean | Max  | Min |
| DE075  |     |     |      |     |     |            |           |           |         |        | DE075    | 1073 | 1904 | 293 |

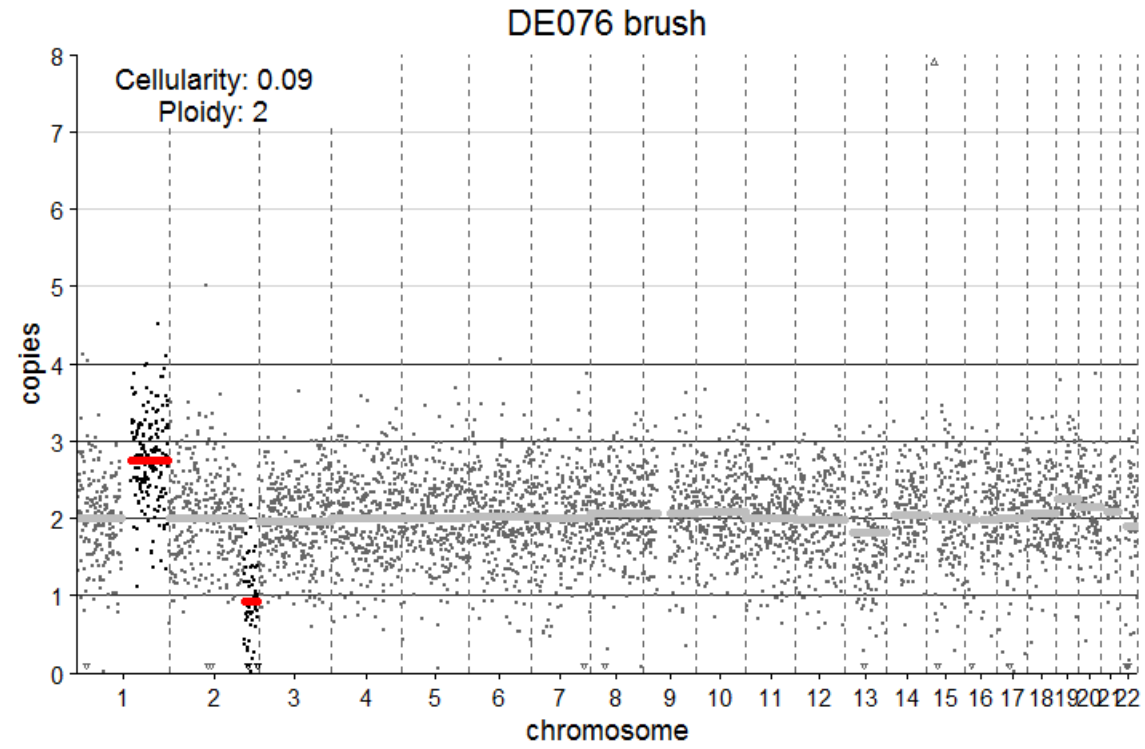

| Sample | Chr | Pos | Gene | REF | ALT | read depth | ref reads | alt reads | VAF (%) | Change | Sample | Coverage |      |     |
|--------|-----|-----|------|-----|-----|------------|-----------|-----------|---------|--------|--------|----------|------|-----|
|        |     |     |      |     |     |            |           |           |         |        |        | Mean     | Max  | Min |
| DE076  |     |     |      |     |     |            |           |           |         |        | DE076  | 5857     | 9655 | 832 |

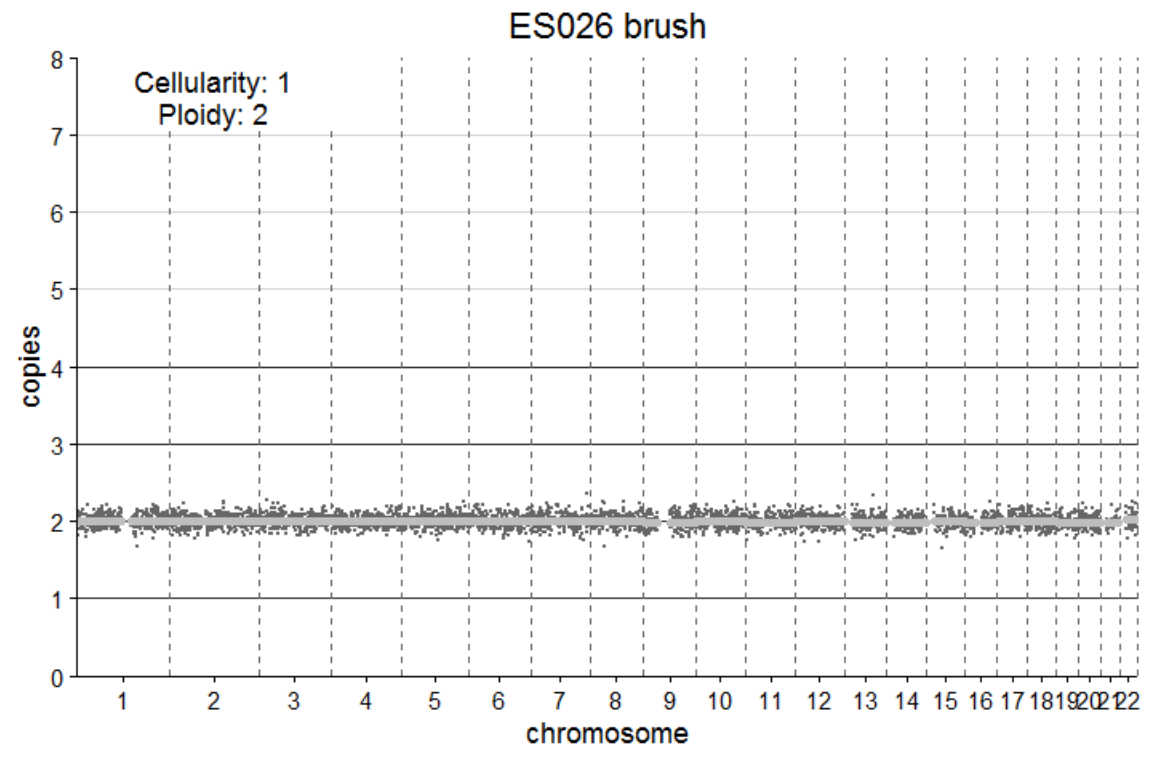

| Sample | Chr | Pos | Gene | REF | ALT | read depth | ref reads | alt reads | VAF (%) | Change | Coverage |      |      |     |
|--------|-----|-----|------|-----|-----|------------|-----------|-----------|---------|--------|----------|------|------|-----|
|        |     |     |      |     |     |            |           |           |         |        | Sample   | Mean | Max  | Min |
| ES026  |     |     |      |     |     |            |           |           |         |        | ES026    | 1017 | 2142 | 374 |

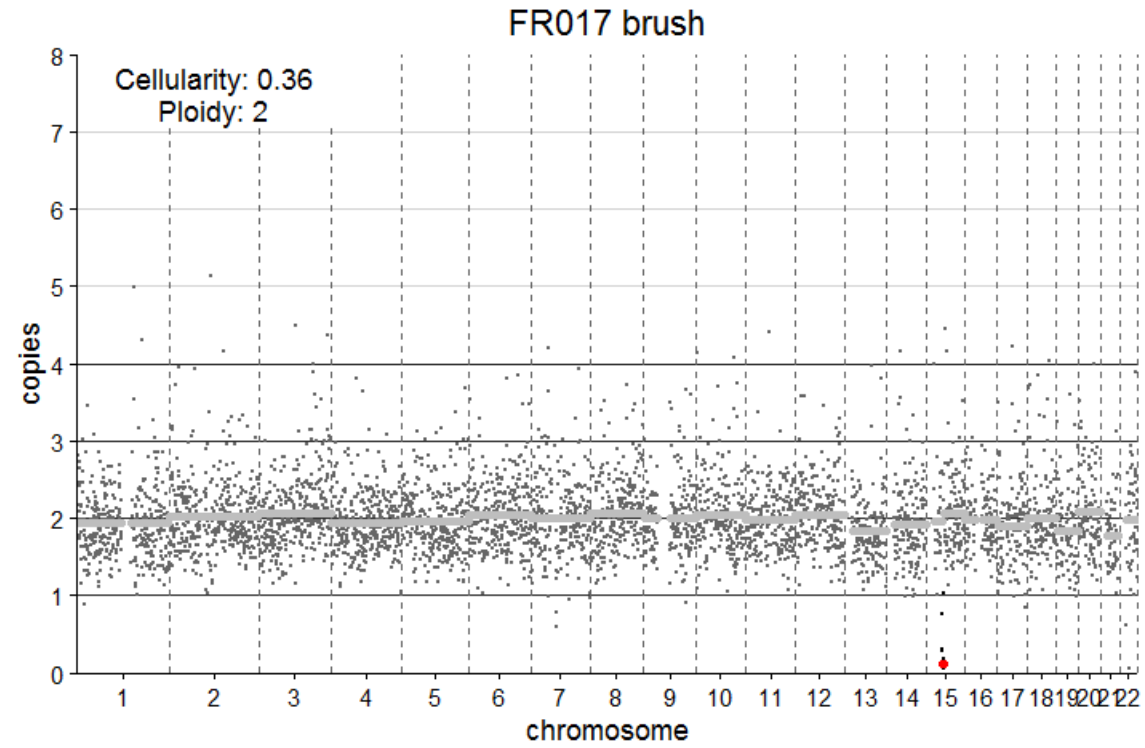

| Sample | Chr   | Pos      | Gene  | REF | ALT | read depth | ref reads | alt reads | VAF (%) | Change      | Sample | Coverage |      |     |
|--------|-------|----------|-------|-----|-----|------------|-----------|-----------|---------|-------------|--------|----------|------|-----|
|        |       |          |       |     |     |            |           |           |         |             |        | Mean     | Max  | Min |
| FR017  | chr10 | 89717672 | PTEN  | C   | T   | 88         | 72        | 16        | 18.18   | p.Arg233*   | FR017  | 280      | 1136 | 51  |
| FR017  | chr12 | 49444974 | KMT2D | G   | A   | 297        | 289       | 8         | 2.69    | p.Ser831Leu |        |          |      |     |
| FR017  | chr17 | 7577139  | TP53  | G   | A   | 222        | 214       | 8         | 3.6     | p.Arg267Trp |        |          |      |     |
| FR017  | chr17 | 7577538  | TP53  | C   | T   | 216        | 210       | 6         | 2.78    | p.Arg248Gln |        |          |      |     |

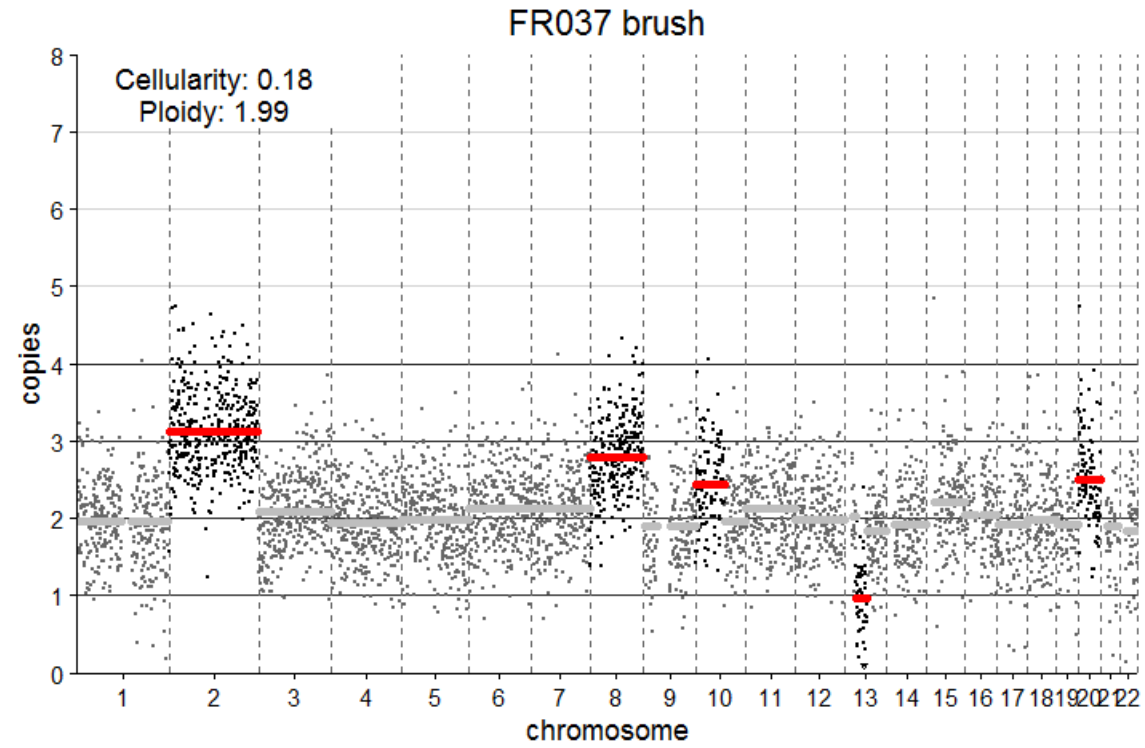

| Sample | Chr   | Pos       | Gene   | REF | ALT | read depth | ref reads | alt reads | VAF (%) | Change      | Sample | Coverage |      |     |
|--------|-------|-----------|--------|-----|-----|------------|-----------|-----------|---------|-------------|--------|----------|------|-----|
|        |       |           |        |     |     |            |           |           |         |             |        | Mean     | Max  | Min |
| FR037  | chr17 | 7577547   | TP53   | C   | T   | 768        | 747       | 21        | 2.73    | p.Gly245Asp | FR037  | 877      | 1501 | 314 |
| FR037  | chr17 | 7578406   | TP53   | C   | T   | 792        | 759       | 33        | 4.17    | p.Arg175His |        |          |      |     |
| FR037  | chr3  | 178928079 | PIK3CA | G   | A   | 644        | 626       | 18        | 2.8     | p.Glu453Lys |        |          |      |     |
| FR037  | chr9  | 21971120  | CDKN2A | G   | A   | 583        | 538       | 45        | 7.72    | p.Arg80*    |        |          |      |     |

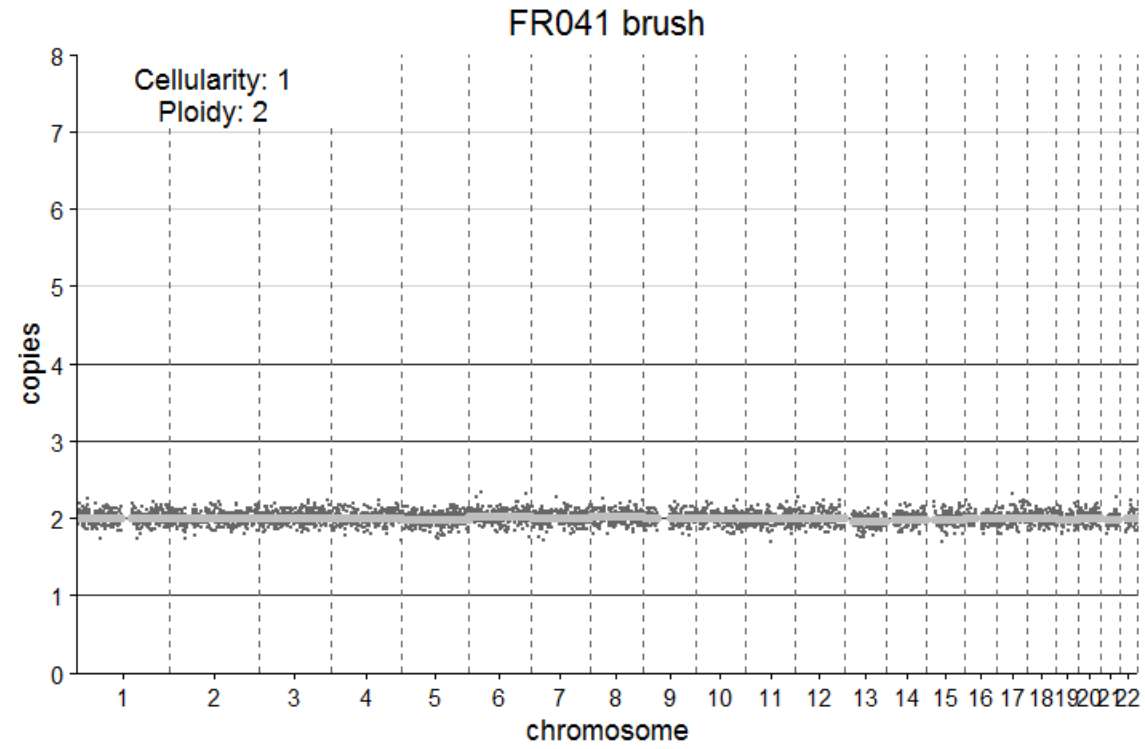

| Sample | Chr | Pos | Gene | REF | ALT | read depth | ref reads | alt reads | VAF (%) | Change | Coverage |      |     |
|--------|-----|-----|------|-----|-----|------------|-----------|-----------|---------|--------|----------|------|-----|
|        |     |     |      |     |     |            |           |           |         |        | Mean     | Max  | Min |
| FR041  |     |     |      |     |     |            |           |           |         |        | 1074     | 1679 | 244 |

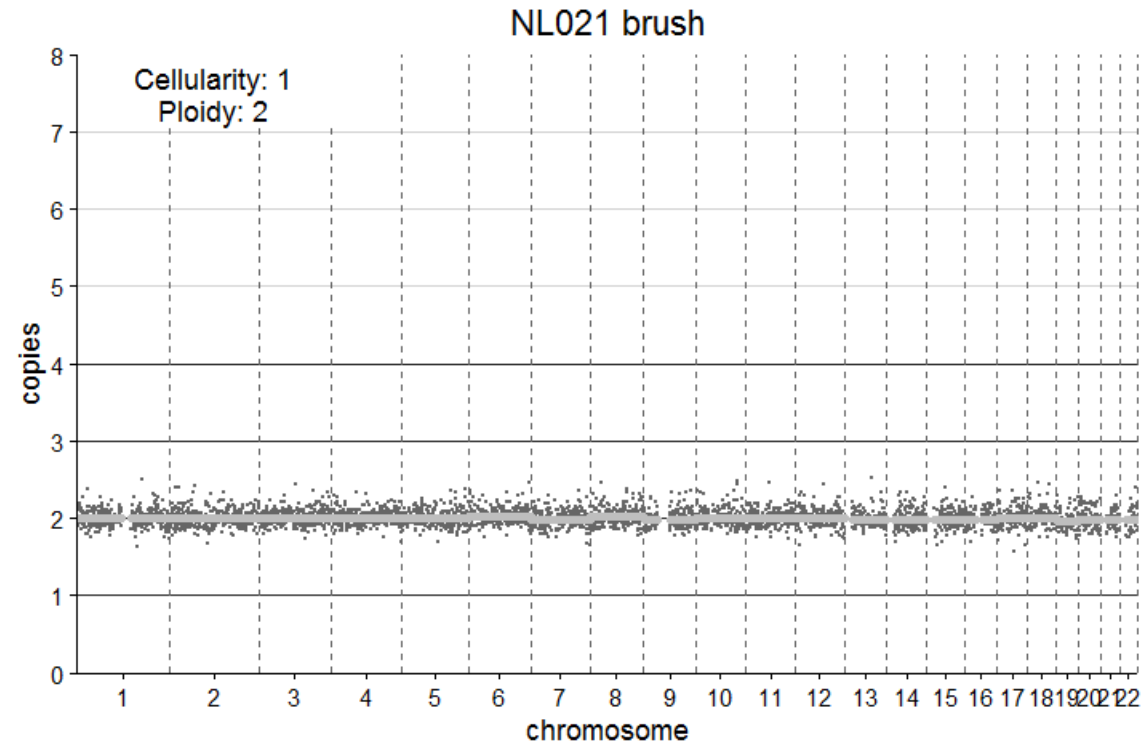

| Sample | Chr | Pos | Gene | REF | ALT | read depth | ref reads | alt reads | VAF (%) | Change | Coverage |      |     |
|--------|-----|-----|------|-----|-----|------------|-----------|-----------|---------|--------|----------|------|-----|
|        |     |     |      |     |     |            |           |           |         |        | Mean     | Max  | Min |
| NL021  |     |     |      |     |     |            |           |           |         |        | 2671     | 4993 | 588 |



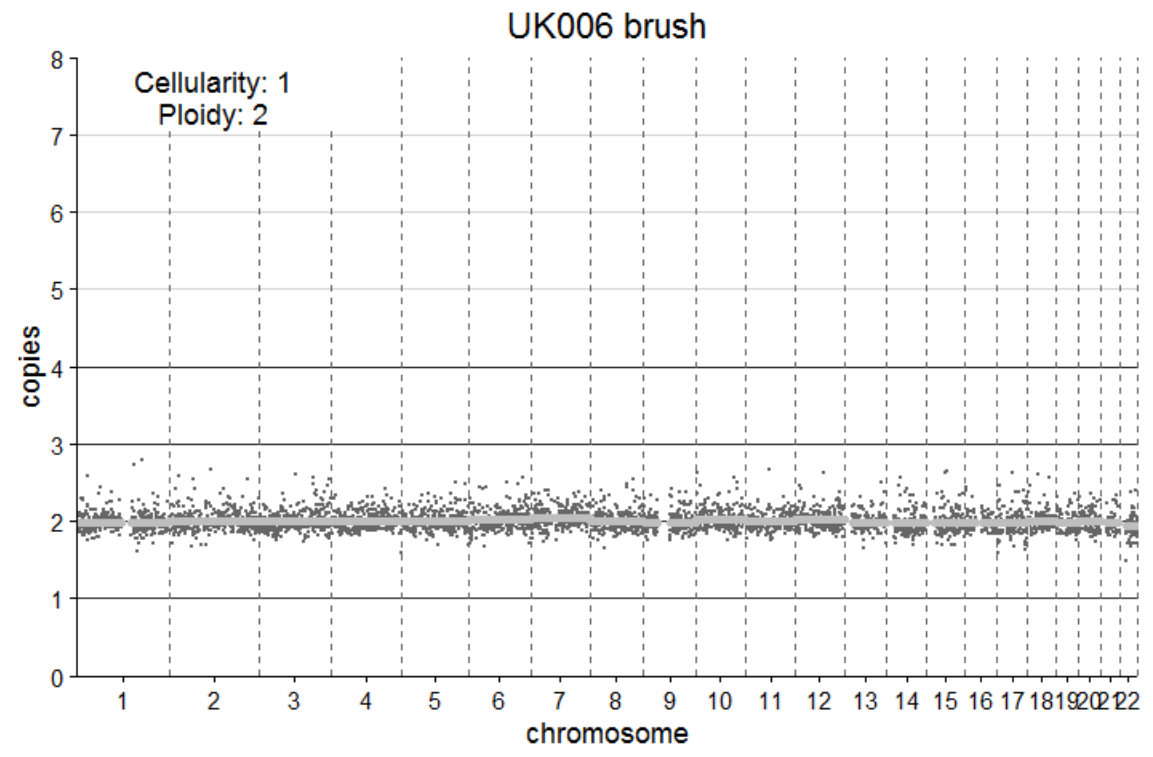

| Sample | Chr | Pos | Gene | REF | ALT | read depth | ref reads | alt reads | VAF (%) | Change | Coverage |      |     |
|--------|-----|-----|------|-----|-----|------------|-----------|-----------|---------|--------|----------|------|-----|
|        |     |     |      |     |     |            |           |           |         |        | Mean     | Max  | Min |
| UK006  |     |     |      |     |     |            |           |           |         |        | 1015     | 2153 | 230 |

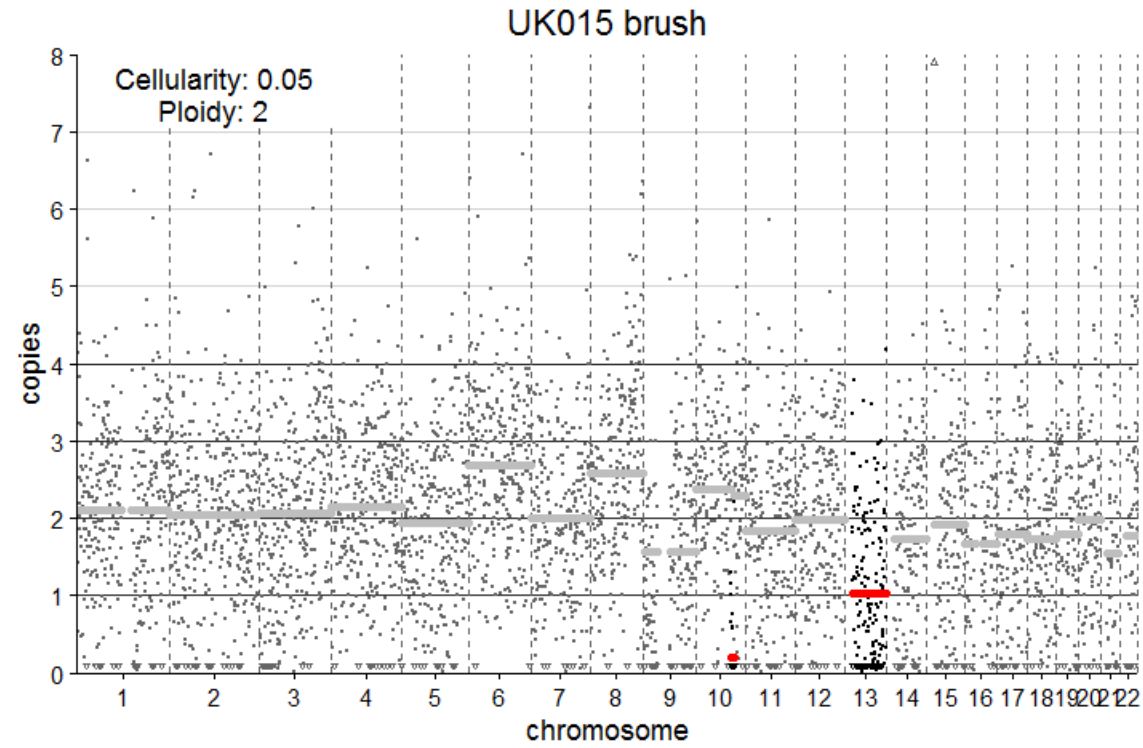

| Sample | Chr | Pos | Gene | REF | ALT | read depth | ref reads | alt reads | VAF (%) | Change | Coverage |      |      |     |
|--------|-----|-----|------|-----|-----|------------|-----------|-----------|---------|--------|----------|------|------|-----|
|        |     |     |      |     |     |            |           |           |         |        | Sample   | Mean | Max  | Min |
| UK015  |     |     |      |     |     |            |           |           |         |        | UK015    | 1295 | 2794 | 403 |

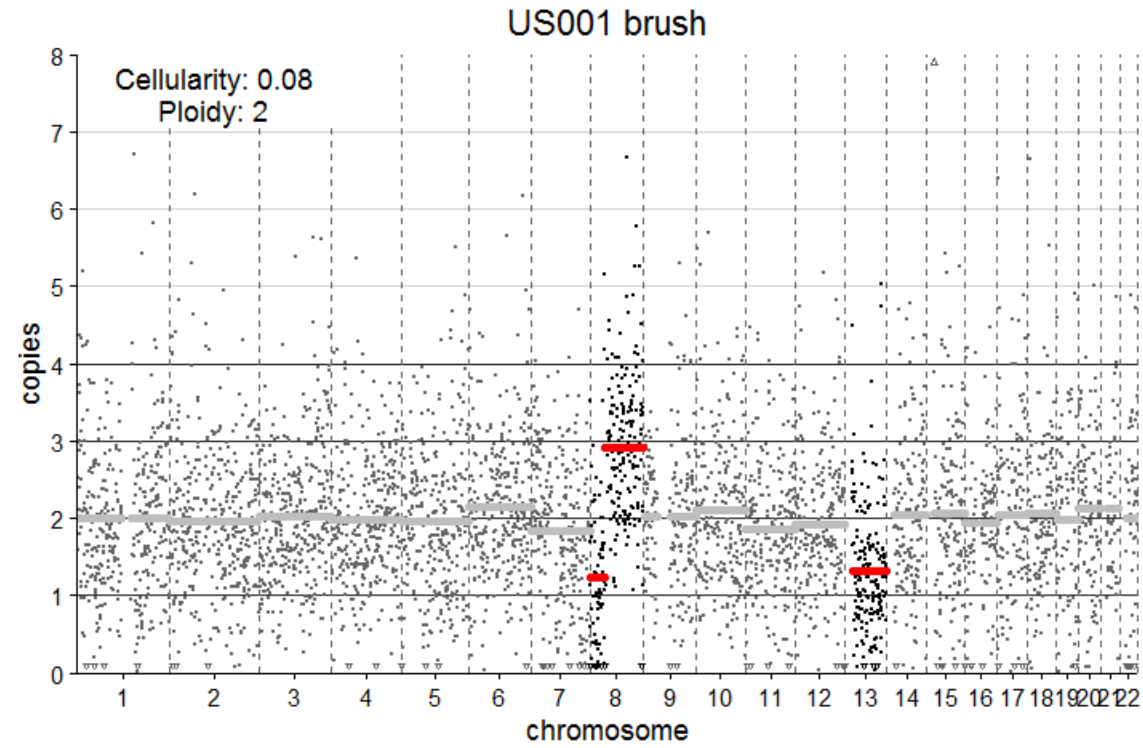

| Sample | Chr   | Pos       | Gene   | REF | ALT | read depth | ref reads | alt reads | VAF (%) | Change      | Sample | Coverage |      |     |
|--------|-------|-----------|--------|-----|-----|------------|-----------|-----------|---------|-------------|--------|----------|------|-----|
|        |       |           |        |     |     |            |           |           |         |             |        | Mean     | Max  | Min |
| US001  | chr12 | 49445427  | KMT2D  | G   | A   | 551        | 537       | 14        | 2.54    | p.Thr680Met | US001  | 671      | 2321 | 290 |
| US001  | chr2  | 202137429 | CASP8  | GAA | G   | 575        | 545       | 29        | 5.05    | p.Lys220fs  |        |          |      |     |
| US001  | chr4  | 187628003 | FAT1   | C   | CT  | 498        | 459       | 39        | 7.83    | p.Lys994fs  |        |          |      |     |
| US001  | chr9  | 139404331 | NOTCH1 | GA  | G   | 569        | 536       | 33        | 5.8     | p.Phe941fs  |        |          |      |     |

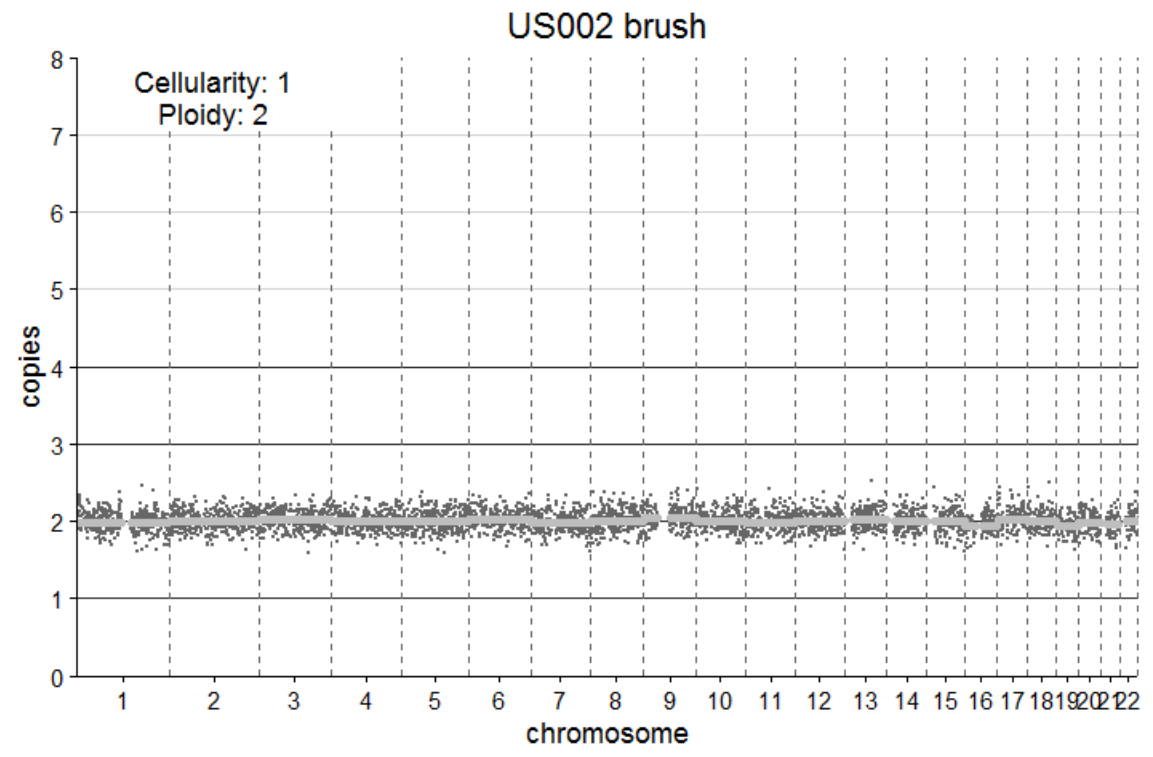

| Sample | Chr | Pos | Gene | REF | ALT | read depth | ref reads | alt reads | VAF (%) | Change | Coverage |      |     |     |
|--------|-----|-----|------|-----|-----|------------|-----------|-----------|---------|--------|----------|------|-----|-----|
|        |     |     |      |     |     |            |           |           |         |        | Sample   | Mean | Max | Min |
| US002  |     |     |      |     |     |            |           |           |         |        | US002    | 166  | 847 | 47  |

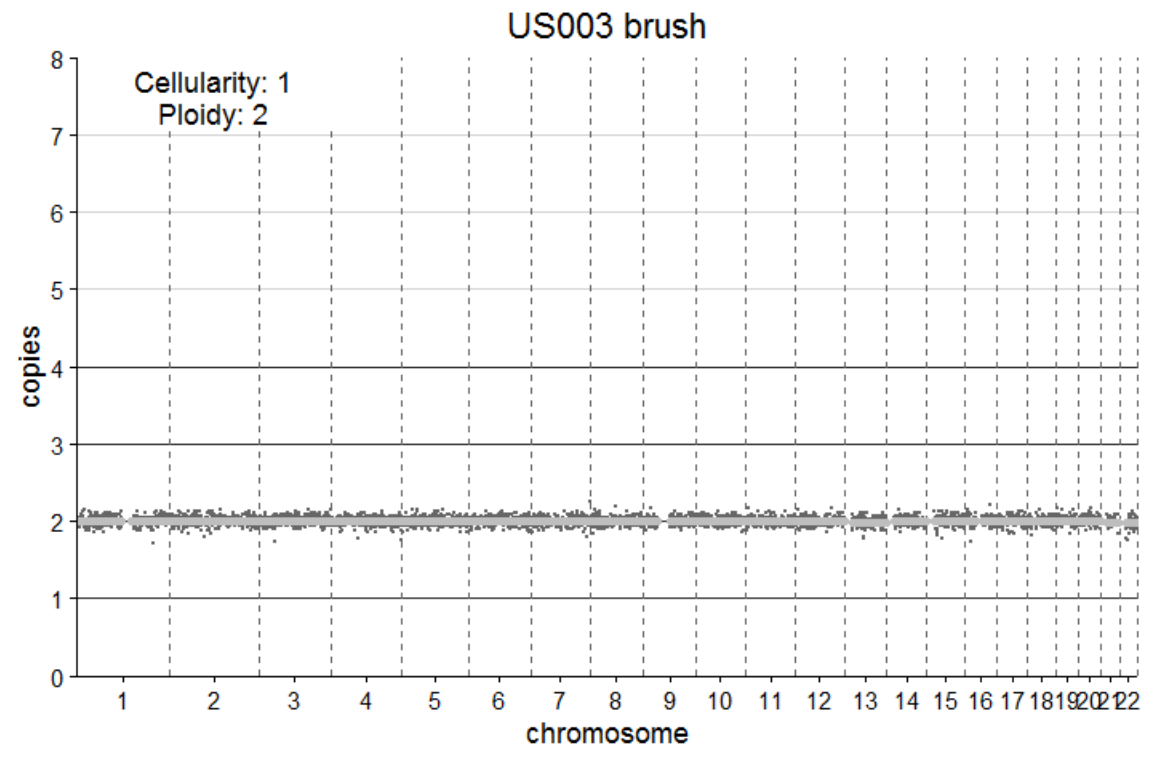

| Sample | Chr | Pos | Gene | REF | ALT | read depth | ref reads | alt reads | VAF (%) | Change | Coverage |      |      |     |
|--------|-----|-----|------|-----|-----|------------|-----------|-----------|---------|--------|----------|------|------|-----|
|        |     |     |      |     |     |            |           |           |         |        | Sample   | Mean | Max  | Min |
| US003  |     |     |      |     |     |            |           |           |         |        | US003    | 3769 | 5186 | 469 |

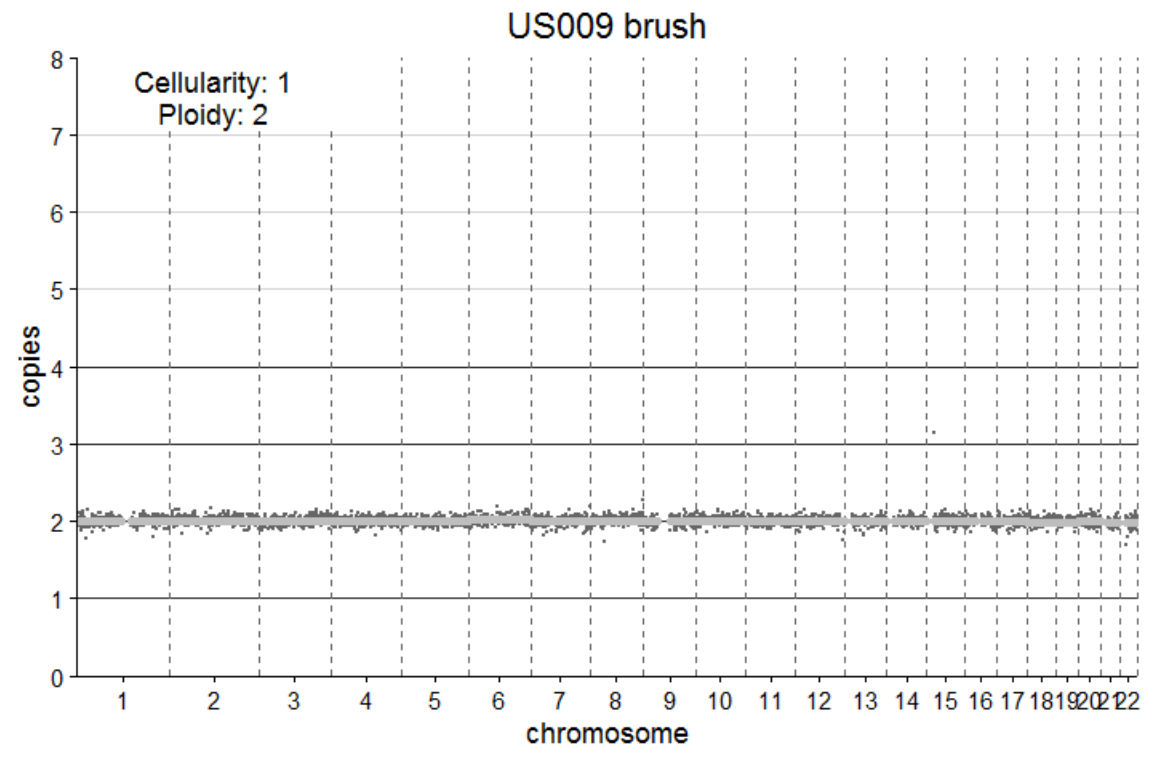

| Sample | Chr | Pos | Gene | REF | ALT | read depth | ref reads | alt reads | VAF (%) | Change | Coverage |      |      |     |
|--------|-----|-----|------|-----|-----|------------|-----------|-----------|---------|--------|----------|------|------|-----|
|        |     |     |      |     |     |            |           |           |         |        | Sample   | Mean | Max  | Min |
| US009  |     |     |      |     |     |            |           |           |         |        | US009    | 1209 | 2179 | 366 |

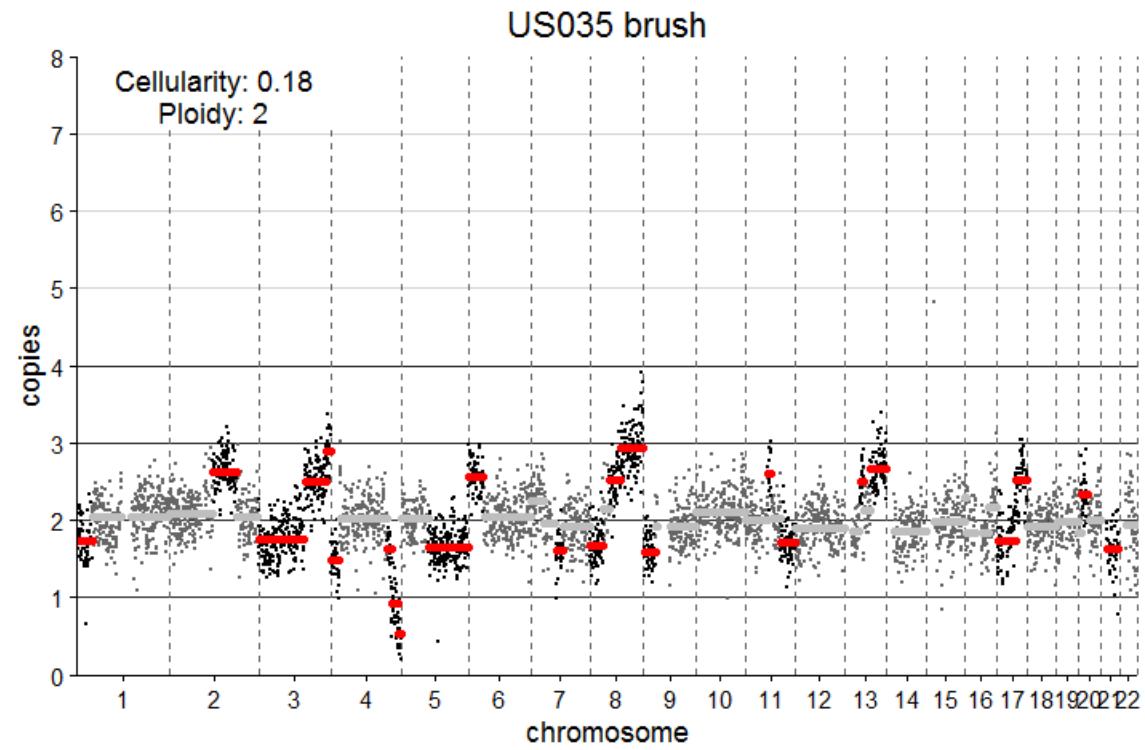

| Sample | Chr   | Pos     | Gene | REF | ALT | read depth | ref reads | alt reads | VAF (%) | Change      | Sample | Coverage |      |     |
|--------|-------|---------|------|-----|-----|------------|-----------|-----------|---------|-------------|--------|----------|------|-----|
|        |       |         |      |     |     |            |           |           |         |             |        | Mean     | Max  | Min |
| US035  | chr17 | 7577538 | TP53 | C   | T   | 2113       | 2059      | 54        | 2.56    | p.Arg248Gln | US035  | 2443     | 4067 | 340 |

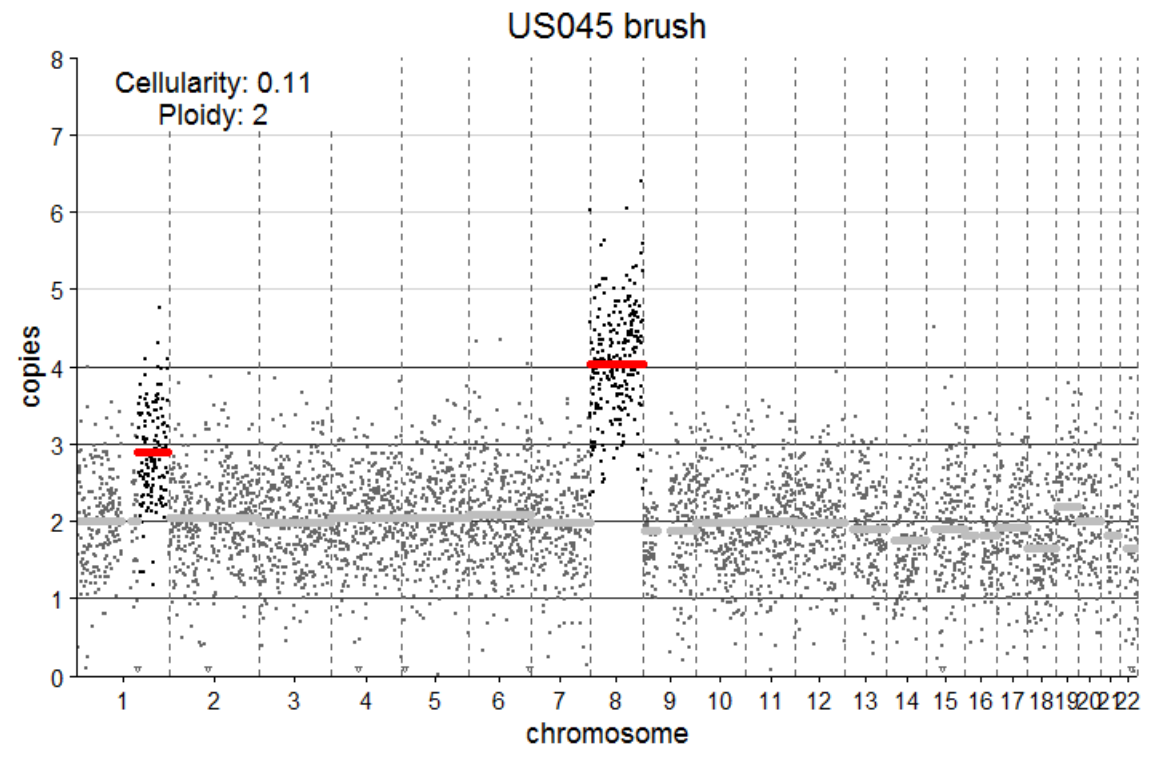

| Sample | Chr | Pos | Gene | REF | ALT | read depth | ref reads | alt reads | VAF (%) | Change | Sample | Coverage |     |     |
|--------|-----|-----|------|-----|-----|------------|-----------|-----------|---------|--------|--------|----------|-----|-----|
|        |     |     |      |     |     |            |           |           |         |        |        | Mean     | Max | Min |
| US045  |     |     |      |     |     |            |           |           |         |        | 1649   | 2721     | 439 |     |



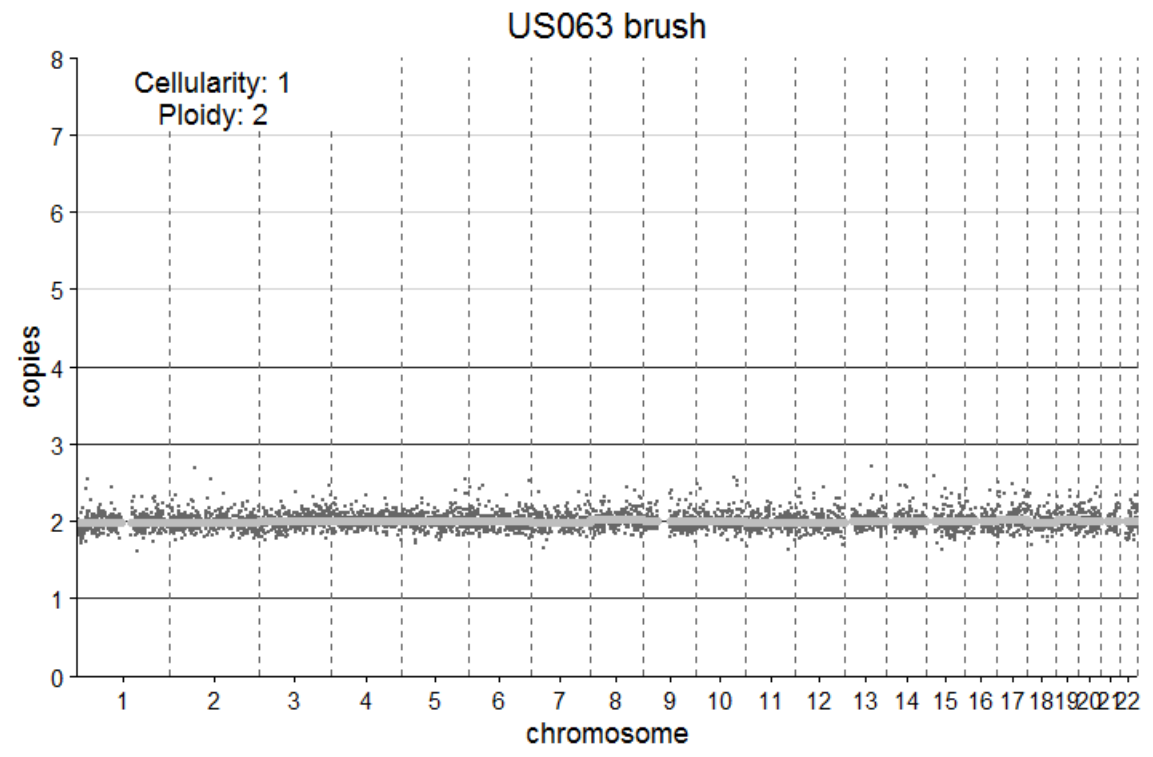

| Sample | Chr | Pos | Gene | REF | ALT | read depth | ref reads | alt reads | VAF (%) | Change | Coverage |      |      |     |
|--------|-----|-----|------|-----|-----|------------|-----------|-----------|---------|--------|----------|------|------|-----|
|        |     |     |      |     |     |            |           |           |         |        | Sample   | Mean | Max  | Min |
| US063  |     |     |      |     |     |            |           |           |         |        | US063    | 923  | 2465 | 246 |

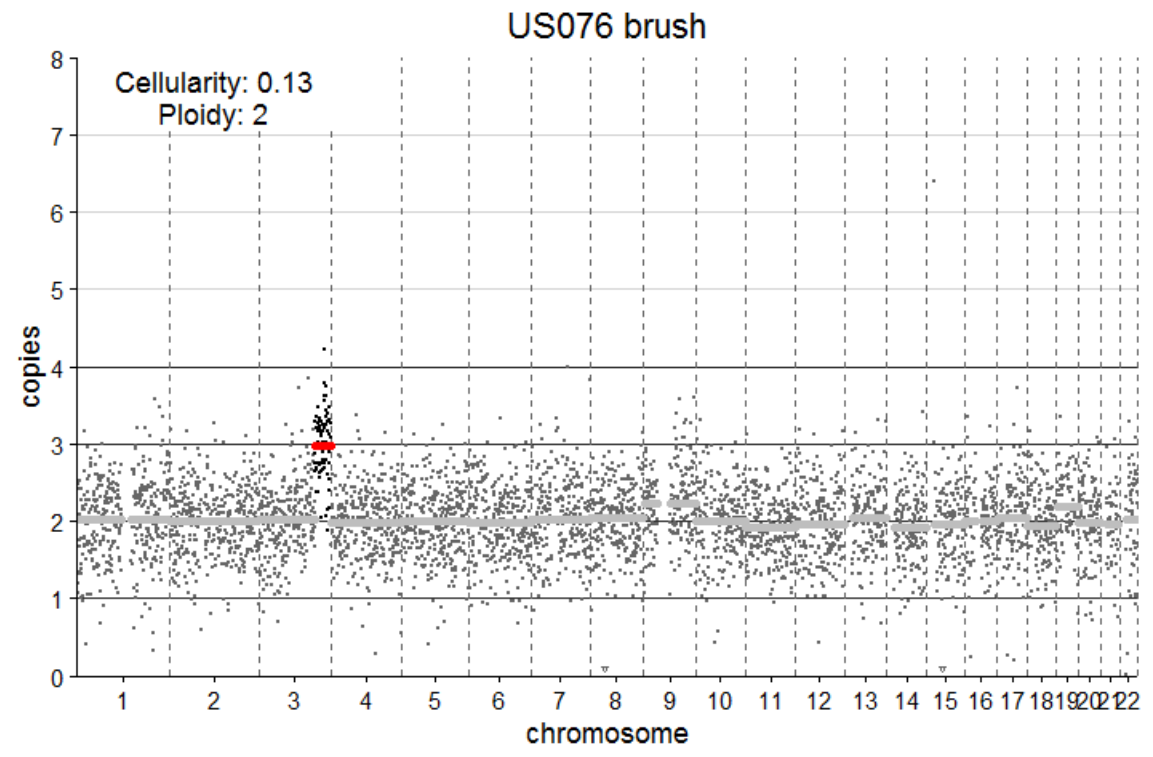

| Sample | Chr | Pos | Gene | REF | ALT | read depth | ref reads | alt reads | VAF (%) | Change | Coverage |      |     |
|--------|-----|-----|------|-----|-----|------------|-----------|-----------|---------|--------|----------|------|-----|
|        |     |     |      |     |     |            |           |           |         |        | Mean     | Max  | Min |
| US076  |     |     |      |     |     |            |           |           |         |        | 6436     | 8820 | 580 |

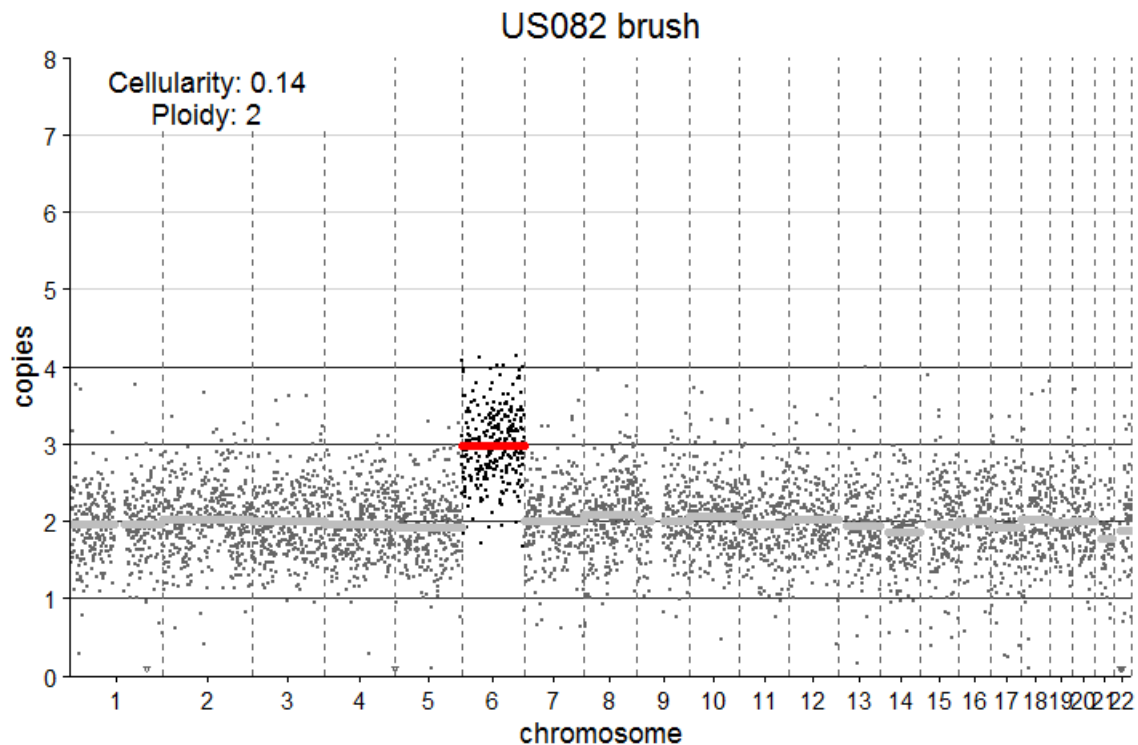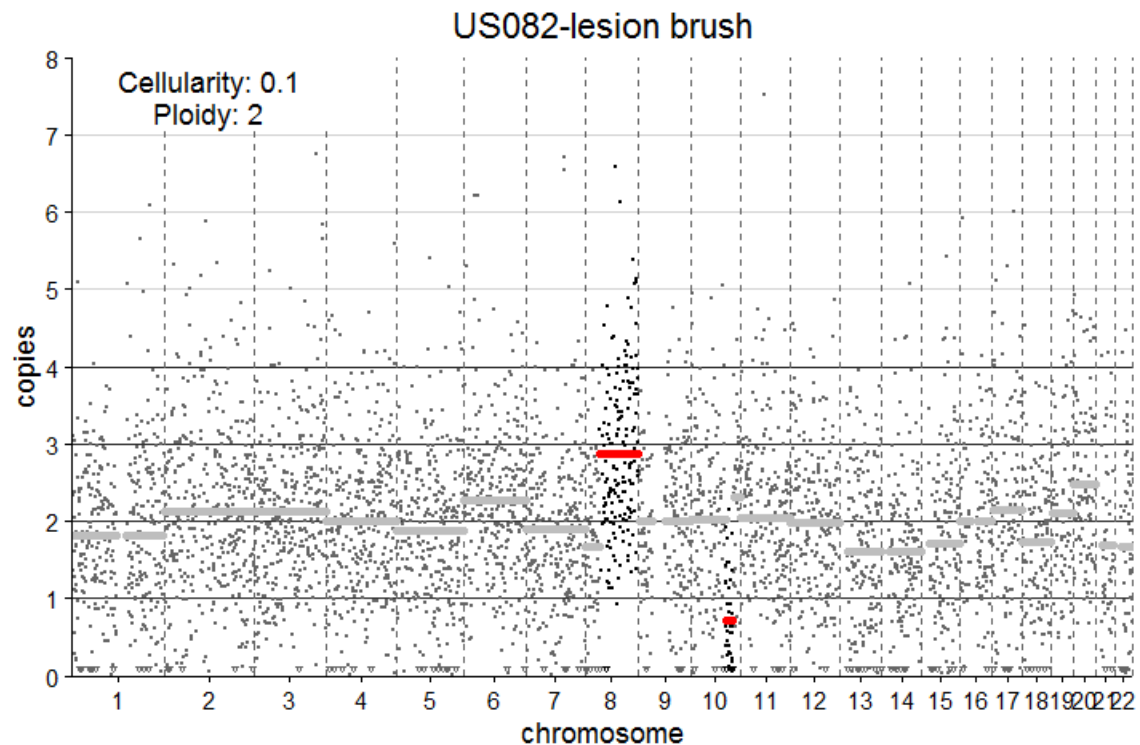

| Sample       | Chr   | Pos       | Gene   | REF | ALT | read depth | ref reads | alt reads | VAF (%) | Change       | Coverage |      |      |     |
|--------------|-------|-----------|--------|-----|-----|------------|-----------|-----------|---------|--------------|----------|------|------|-----|
|              |       |           |        |     |     |            |           |           |         |              | Sample   | Mean | Max  | Min |
| US082        | chr2  | 202141586 | CASP8  | C   | T   | 3475       | 3361      | 113       | 3.25    | p.Arg292Trp  | US082    | 3200 | 5114 | 124 |
| US082        | chr3  | 178936082 | PIK3CA | G   | A   | 3169       | 2859      | 310       | 9.78    | p.Glu542Lys  |          |      |      |     |
| US082        | chr17 | 7577568   | TP53   | C   | A   | 3430       | 3282      | 148       | 4.31    | p.Cys238Phe  |          |      |      |     |
| US082        | chr17 | 7578406   | TP53   | C   | T   | 2713       | 2608      | 105       | 3.87    | p.Arg175His  |          |      |      |     |
| US082-lesion | chr2  | 202141586 | CASP8  | C   | T   | 466        | 452       | 14        | 3       | p.Arg292Trp  |          |      |      |     |
| US082-lesion | chr9  | 139413049 | NOTCH1 | G   | A   | 341        | 319       | 22        | 6.45    | p.Arg365Cys  |          |      |      |     |
| US082-lesion | chr12 | 49426624  | KMT2D  | A   | T   | 405        | 374       | 29        | 7.2     | p.Leu3955Gln |          |      |      |     |
| US082-lesion | chr12 | 49426669  | KMT2D  | A   | T   | 289        | 275       | 10        | 3.51    | p.Leu3940His |          |      |      |     |
| US082-lesion | chr12 | 49426696  | KMT2D  | A   | T   | 246        | 239       | 7         | 2.85    | p.Leu3931His |          |      |      |     |
| US082-lesion | chr12 | 49426711  | KMT2D  | A   | T   | 231        | 225       | 6         | 2.6     | p.Leu3926His |          |      |      |     |
| US082-lesion | chr17 | 7577085   | TP53   | C   | T   | 509        | 463       | 46        | 9.04    | p.Glu285Lys  |          |      |      |     |

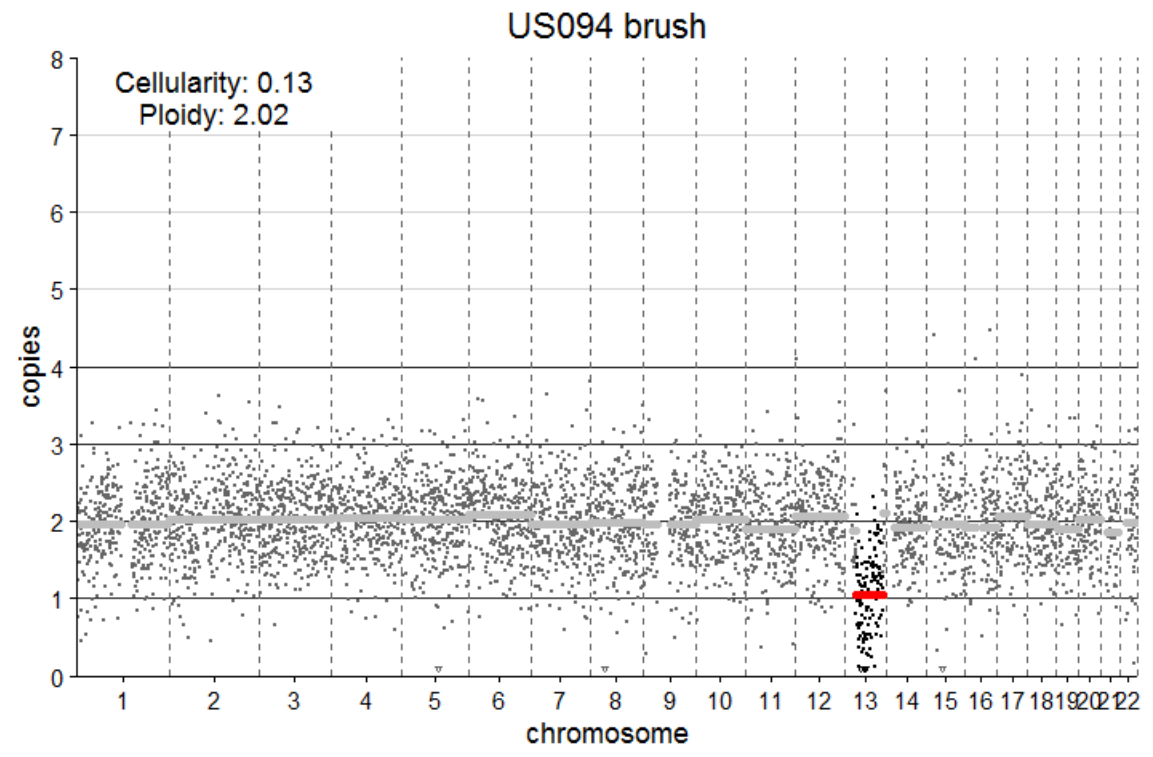

| Sample | Chr | Pos | Gene | REF | ALT | read depth | ref reads | alt reads | VAF (%) | Change | Coverage |      |      |     |
|--------|-----|-----|------|-----|-----|------------|-----------|-----------|---------|--------|----------|------|------|-----|
|        |     |     |      |     |     |            |           |           |         |        | Sample   | Mean | Max  | Min |
| US094  |     |     |      |     |     |            |           |           |         |        | US094    | 1979 | 2804 | 404 |

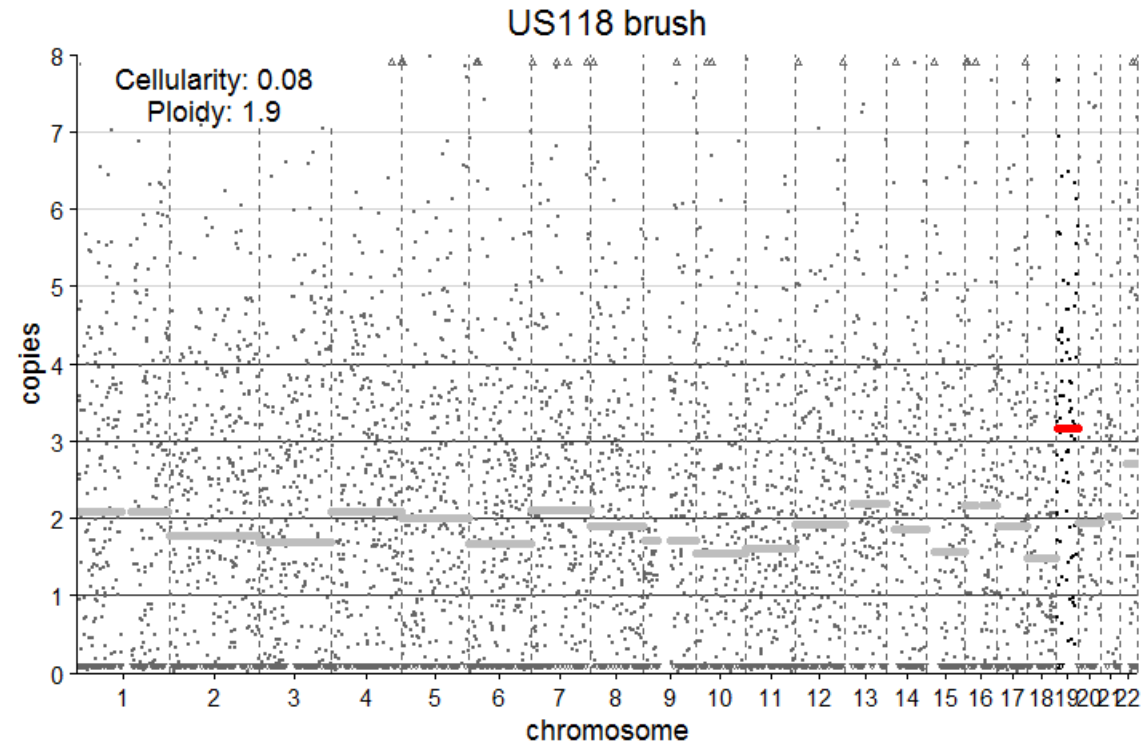

| Sample | Chr | Pos | Gene | REF | ALT | read depth | ref reads | alt reads | VAF (%) | Change | Coverage |      |      |     |
|--------|-----|-----|------|-----|-----|------------|-----------|-----------|---------|--------|----------|------|------|-----|
|        |     |     |      |     |     |            |           |           |         |        | Sample   | Mean | Max  | Min |
| US118  |     |     |      |     |     |            |           |           |         |        | US118    | 1623 | 3122 | 628 |

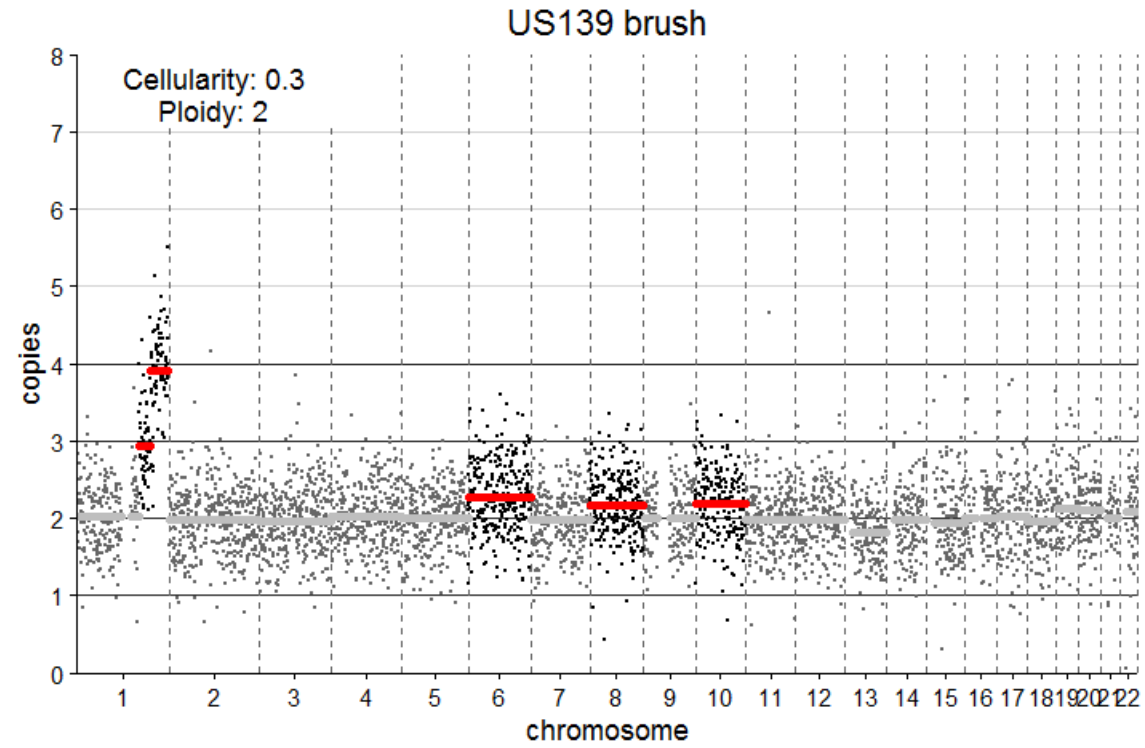

| Sample | Chr  | Pos       | Gene   | REF | ALT | read depth | ref reads | alt reads | VAF (%) | Change       | Sample | Coverage |     |     |
|--------|------|-----------|--------|-----|-----|------------|-----------|-----------|---------|--------------|--------|----------|-----|-----|
|        |      |           |        |     |     |            |           |           |         |              |        | Mean     | Max | Min |
| US139  | chr3 | 178928067 | PIK3CA | C   | T   | 310        | 302       | 8         | 2.58    | p.Pro449Ser  |        |          |     |     |
| US139  | chr3 | 178951957 | PIK3CA | G   | A   | 317        | 307       | 10        | 3.15    | p.Met1004Ile | US139  | 286      | 886 | 77  |

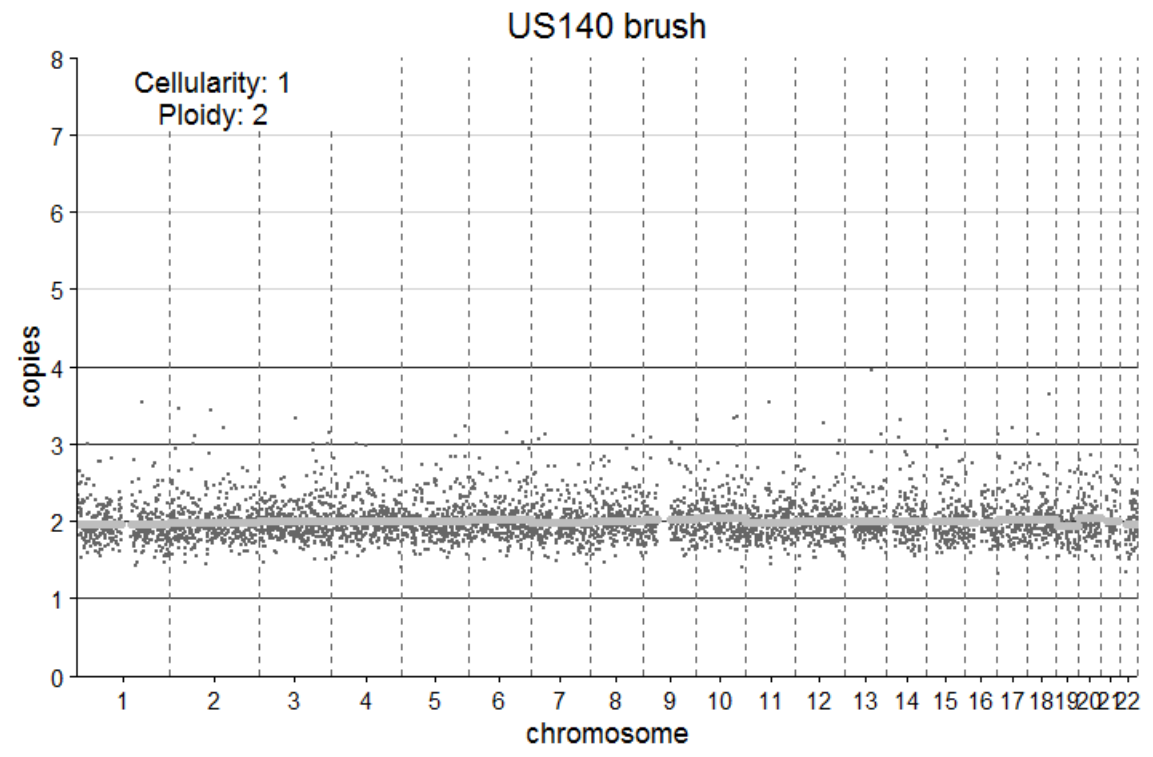

| Sample | Chr | Pos | Gene | REF | ALT | read depth | ref reads | alt reads | VAF (%) | Change | Coverage |      |      |     |
|--------|-----|-----|------|-----|-----|------------|-----------|-----------|---------|--------|----------|------|------|-----|
|        |     |     |      |     |     |            |           |           |         |        | Sample   | Mean | Max  | Min |
| US140  |     |     |      |     |     |            |           |           |         |        | US140    | 329  | 1641 | 76  |

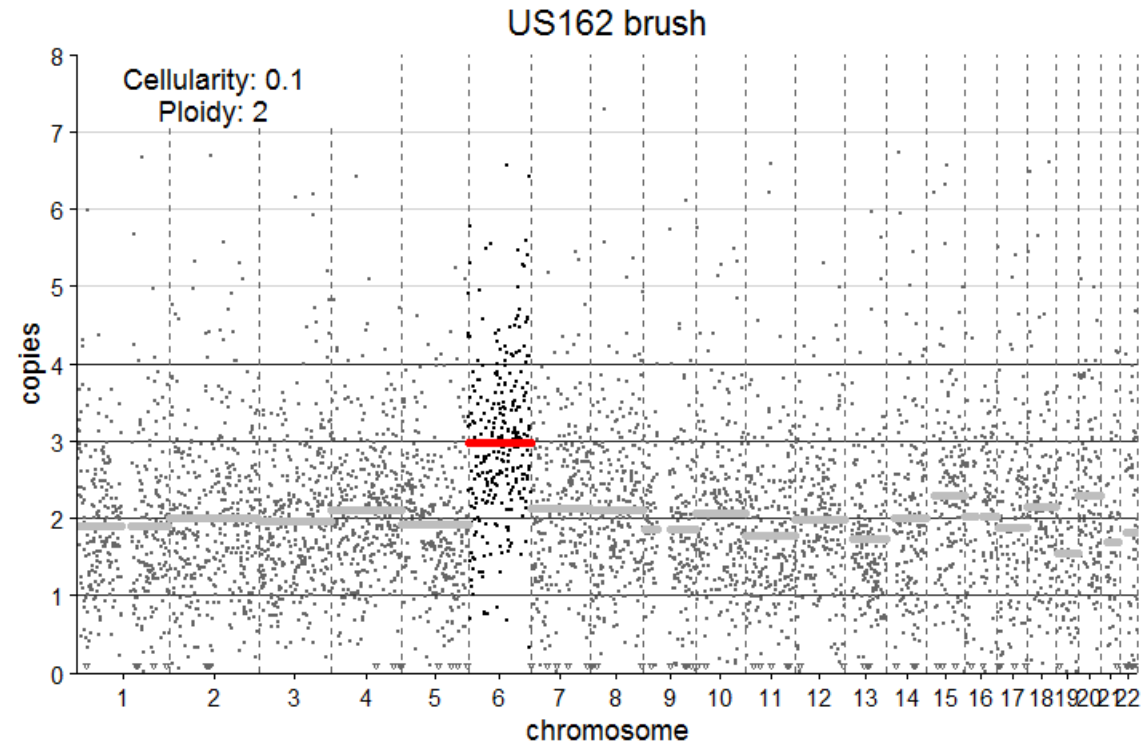

| Sample | Chr   | Pos      | Gene  | REF | ALT | read depth | ref reads | alt reads | VAF (%) | Change     | Sample | Coverage |      |     |
|--------|-------|----------|-------|-----|-----|------------|-----------|-----------|---------|------------|--------|----------|------|-----|
|        |       |          |       |     |     |            |           |           |         |            |        | Mean     | Max  | Min |
| US162  | chr14 | 23450816 | AJUBA | C   | CA  | 2613       | 2358      | 255       | 9.76    | p.Gly221fs | US162  | 1695     | 3366 | 626 |



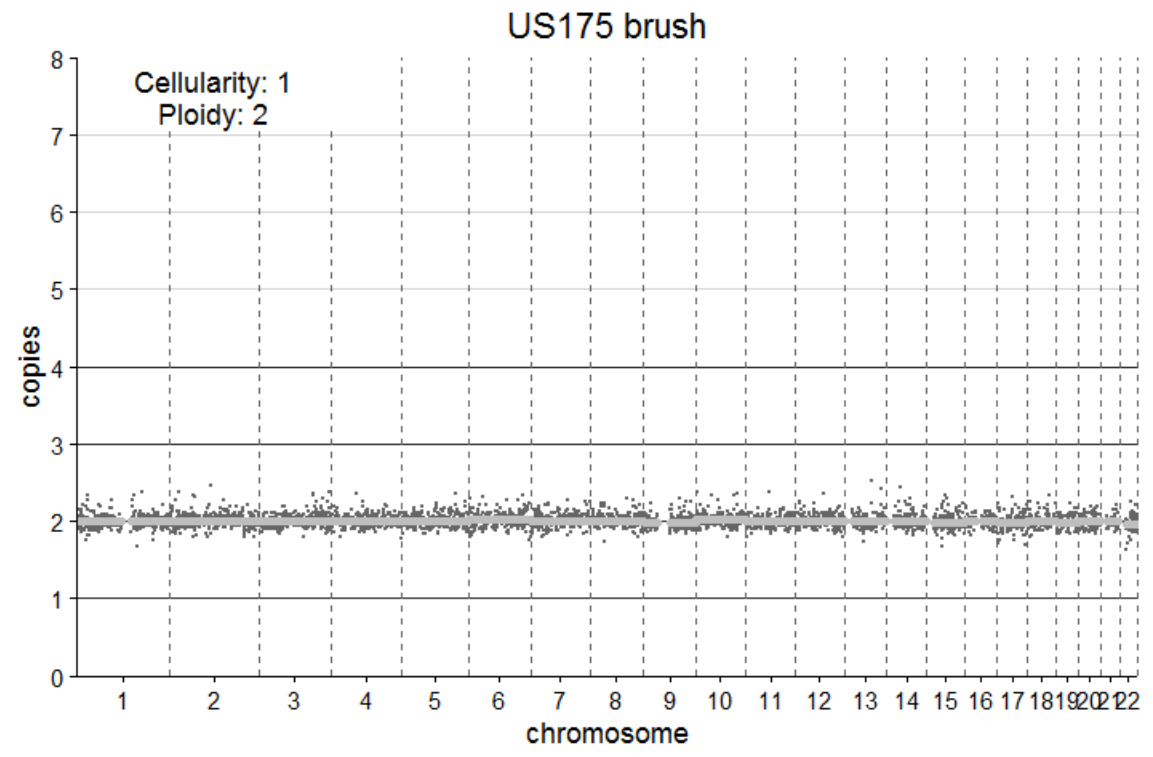

| Sample | Chr | Pos | Gene | REF | ALT | read depth | ref reads | alt reads | VAF (%) | Change | Coverage |      |      |     |
|--------|-----|-----|------|-----|-----|------------|-----------|-----------|---------|--------|----------|------|------|-----|
|        |     |     |      |     |     |            |           |           |         |        | Sample   | Mean | Max  | Min |
| US175  |     |     |      |     |     |            |           |           |         |        | US175    | 2814 | 5137 | 717 |

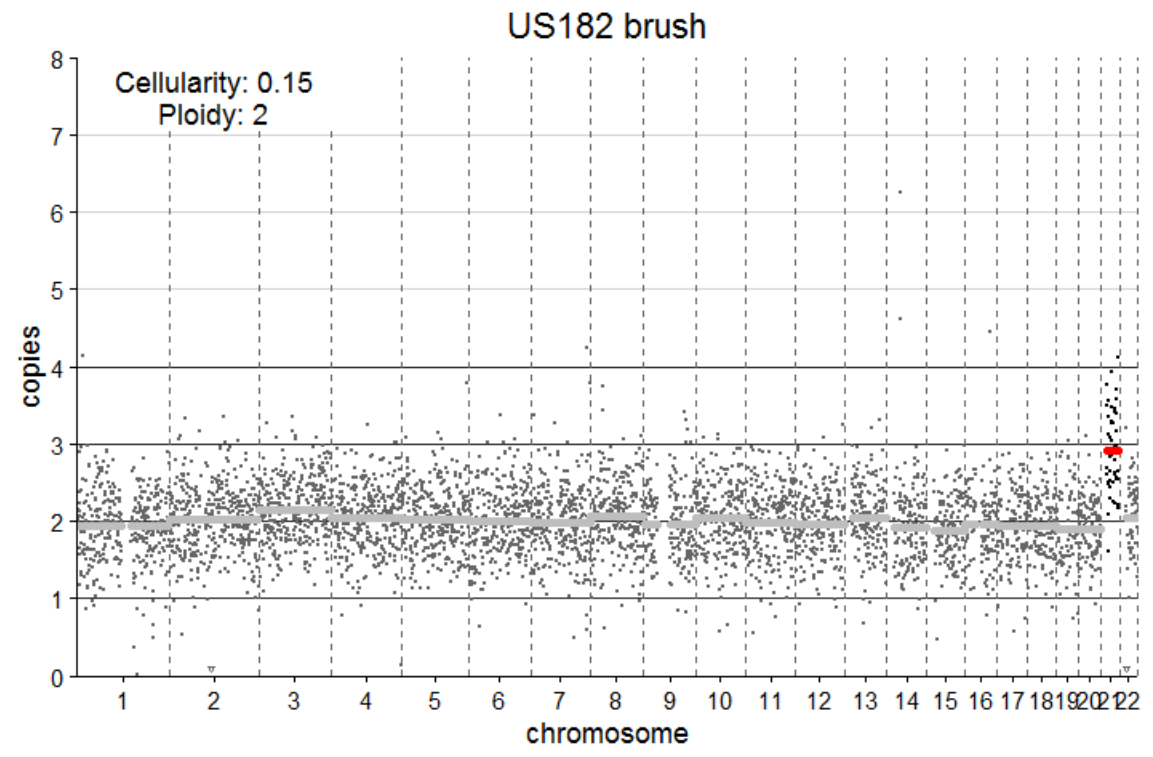

| Sample | Chr | Pos | Gene | REF | ALT | read depth | ref reads | alt reads | VAF (%) | Change | Coverage |      |     |
|--------|-----|-----|------|-----|-----|------------|-----------|-----------|---------|--------|----------|------|-----|
|        |     |     |      |     |     |            |           |           |         |        | Mean     | Max  | Min |
| US182  |     |     |      |     |     |            |           |           |         |        | 2253     | 3736 | 378 |
