# Supplementary material for: Oral cancer prediction by noninvasive genetic screening
Source: PubMed Central journal article supplement — Int J Cancer. 2022 Sep 18;152(2):227–38. doi: 10.1002/ijc.34277 (PMC9826173; doi:10.1002/ijc.34277), 2022-09-18
Supplement: IJC-152-227-s004.pdf [file IJC-152-227-s004.pdf]

| Sample      | Total reads | Uniquely mapped     | Total covered  | Coverage |       |     | Fraction bases at coverage |        |         |         |
|-------------|-------------|---------------------|----------------|----------|-------|-----|----------------------------|--------|---------|---------|
|             |             | non-duplicate reads | targeted bases | Mean     | Max   | Min | >= 20X                     | >= 50X | >= 100X | >= 200X |
| LP09-biopsy | 2,816,494   | 75,219              | 3,819,125      | 62       | 221   | 11  | 0.994                      | 0.669  | 0.067   | 0       |
| LP09-exfo   | 23,101,758  | 1,308,501           | 79,812,757     | 1,296    | 2,392 | 254 | 1                          | 1      | 1       | 1       |
| LP10-biopsy | 14,186,748  | 2,836,101           | 45,269,840     | 735      | 2,082 | 108 | 1                          | 1      | 1       | 0.998   |
| LP10-exfo   | 33,396,030  | 2,048,746           | 113,342,008    | 1,841    | 3,098 | 404 | 1                          | 1      | 1       | 1       |
| LP11-biopsy | 20,016,716  | 413,827             | 21,151,003     | 344      | 942   | 88  | 1                          | 1      | 1       | 0.92    |
| LP11-exfo   | 20,417,260  | 1,331,187           | 82,008,658     | 1,332    | 2,104 | 218 | 1                          | 1      | 1       | 1       |
| LP12-biopsy | 15,786,626  | 2,893,497           | 44,896,086     | 729      | 1,911 | 88  | 1                          | 1      | 1       | 0.997   |
| LP12-exfo   | 42,825,598  | 2,020,865           | 111,295,195    | 1,808    | 4,033 | 429 | 1                          | 1      | 1       | 1       |
| LP13-biopsy | 22,841,406  | 633,668             | 34,550,991     | 561      | 1,629 | 129 | 1                          | 1      | 1       | 0.996   |
| LP13-exfo   | 26,213,354  | 1,269,132           | 75,650,135     | 1,229    | 2,130 | 299 | 1                          | 1      | 1       | 1       |
| LP14-biopsy | 14,487,202  | 518,425             | 27,438,647     | 446      | 1,024 | 84  | 1                          | 1      | 1       | 0.99    |
| LP14-exfo   | 27,139,114  | 1,520,812           | 91,706,268     | 1,490    | 2,469 | 307 | 1                          | 1      | 1       | 1       |
| LP15-biopsy | 18,335,956  | 608,732             | 33,034,308     | 537      | 1,205 | 125 | 1                          | 1      | 1       | 0.997   |
| LP15-exfo   | 22,223,896  | 825,322             | 48,297,075     | 784      | 1,491 | 225 | 1                          | 1      | 1       | 1       |
| LP17-biopsy | 19,455,602  | 3,442,516           | 55,792,896     | 906      | 2,537 | 165 | 1                          | 1      | 1       | 0.999   |
| LP17-exfo   | 17,778,122  | 634,739             | 33,709,233     | 548      | 1,454 | 150 | 1                          | 1      | 1       | 1       |
| LP19-biopsy | 21,451,856  | 984,508             | 54,775,838     | 890      | 1,739 | 193 | 1                          | 1      | 1       | 1       |
| LP19-exfo   | 22,919,398  | 890,530             | 52,334,568     | 850      | 1,594 | 223 | 1                          | 1      | 1       | 1       |
| LP20-biopsy | 25,360,064  | 2,067,496           | 109,979,169    | 1,786    | 4,333 | 284 | 1                          | 1      | 1       | 1       |
| LP20-exfo   | 26,456,240  | 967,219             | 51,878,881     | 843      | 1,832 | 224 | 1                          | 1      | 1       | 1       |
| LP21-biopsy | 21,100,752  | 2,102,775           | 114,669,180    | 1,863    | 3,849 | 298 | 1                          | 1      | 1       | 1       |
| LP21-exfo   | 11,099,688  | 438,114             | 23,805,588     | 387      | 1,001 | 89  | 1                          | 1      | 1       | 0.997   |
| LP22-biopsy | 25,568,854  | 613,864             | 34,420,845     | 559      | 1,133 | 162 | 1                          | 1      | 1       | 0.999   |
| LP22-exfo   | 24,552,436  | 1,641,670           | 99,841,773     | 1,622    | 2,432 | 314 | 1                          | 1      | 1       | 1       |
| LP25-biopsy | 18,372,902  | 1,205,232           | 65,563,897     | 1,065    | 2,139 | 202 | 1                          | 1      | 1       | 1       |
| LP25-exfo   | 24,555,516  | 1,715,618           | 105,671,395    | 1,716    | 3,147 | 328 | 1                          | 1      | 1       | 1       |
| LP26-biopsy | 27,668,770  | 5,274,748           | 99,369,940     | 1,614    | 4,317 | 264 | 1                          | 1      | 1       | 1       |
| LP26-exfo   | 58,523,506  | 3,289,226           | 179,425,613    | 2,914    | 5,062 | 585 | 1                          | 1      | 1       | 1       |
| LP27-biopsy | 11,867,624  | 2,113,505           | 32,923,080     | 535      | 1,158 | 83  | 1                          | 1      | 1       | 0.996   |
| LP27-exfo   | 43,029,218  | 1,223,945           | 71,349,859     | 1,159    | 2,681 | 367 | 1                          | 1      | 1       | 1       |
| LP28-biopsy | 31,405,134  | 307,093             | 10,504,843     | 171      | 1,158 | 6   | 0.999                      | 0.993  | 0.883   | 0.306   |
| LP28-exfo   | 17,725,598  | 887,080             | 48,461,478     | 787      | 1,836 | 170 | 1                          | 1      | 1       | 1       |
| LP29-biopsy | 27,089,744  | 175,493             | 6,493,871      | 105      | 539   | 5   | 0.999                      | 0.96   | 0.523   | 0.015   |
| LP29-exfo   | 23,152,324  | 2,706,248           | 162,810,295    | 2,644    | 3,604 | 342 | 1                          | 1      | 1       | 1       |
| LP31-biopsy | 31,119,352  | 221,014             | 8,183,013      | 133      | 630   | 12  | 1                          | 0.99   | 0.806   | 0.042   |
| LP31-exfo   | 37,055,472  | 3,522,595           | 211,541,397    | 3,436    | 4,780 | 538 | 1                          | 1      | 1       | 1       |
| LP32-biopsy | 18,978,602  | 184,588             | 6,287,762      | 102      | 484   | 9   | 0.998                      | 0.95   | 0.498   | 0.012   |
| LP32-exfo   | 26,007,336  | 3,118,430           | 189,723,239    | 3,082    | 3,954 | 411 | 1                          | 1      | 1       | 1       |
| LP33-biopsy | 22,180,002  | 195,146             | 7,437,191      | 121      | 590   | 5   | 0.999                      | 0.98   | 0.667   | 0.038   |
| LP33-exfo   | 32,491,736  | 2,049,327           | 119,486,002    | 1,941    | 3,341 | 413 | 1                          | 1      | 1       | 1       |
| LP35-biopsy | 11,716,616  | 292,712             | 12,371,775     | 201      | 586   | 7   | 0.999                      | 0.996  | 0.954   | 0.525   |
| LP35-exfo   | 34,426,462  | 1,565,723           | 86,694,224     | 1,408    | 2,437 | 320 | 1                          | 1      | 1       | 1       |
| LP39-biopsy | 48,930,884  | 417,915             | 15,846,710     | 257      | 952   | 17  | 1                          | 0.999  | 0.994   | 0.765   |
| LP39-exfo   | 10,926,830  | 1,834,226           | 71,705,646     | 62       | 154   | 1   | 1                          | 1      | 1       | 0.999   |
| LP40-biopsy | 31,661,360  | 716,398             | 31,472,862     | 511      | 2,272 | 5   | 0.999                      | 0.999  | 0.992   | 0.968   |
| LP40-exfo   | 14,855,906  | 3,347,930           | 18,943,295     | 308      | 608   | 39  | 1                          | 1      | 0.999   | 0.976   |
| LP41-biopsy | 37,539,106  | 331,962             | 12,791,596     | 208      | 1,228 | 13  | 1                          | 0.996  | 0.917   | 0.543   |
| LP41-exfo   | 3,886,058   | 630,924             | 1,366,106      | 22       | 82    | 1   | 0.655                      | 0.005  | 0       | 0       |
| LP42-biopsy | 40,731,144  | 284,192             | 11,458,034     | 186      | 1,197 | 6   | 0.999                      | 0.999  | 0.978   | 0.332   |
| LP42-exfo   | 6,502,960   | 1,646,417           | 12,116,311     | 197      | 304   | 12  | 1                          | 0.998  | 0.998   | 0.438   |
| LP43-biopsy | 14,116,910  | 360,938             | 16,249,974     | 264      | 818   | 3   | 0.998                      | 0.998  | 0.996   | 0.819   |
| LP43-exfo   | 6,005,160   | 1,129,889           | 2,528,658      | 41       | 143   | 4   | 0.998                      | 0.139  | 0.003   | 0       |
| LP45-biopsy | 34,221,720  | 312,511             | 12,293,685     | 200      | 1,051 | 2   | 0.999                      | 0.998  | 0.984   | 0.445   |
| LP45-exfo   | 22,246,302  | 5,309,703           | 35,243,613     | 572      | 897   | 53  | 1                          | 1      | 1       | 0.998   |
| LP46-biopsy | 55,053,402  | 483,541             | 19,058,402     | 310      | 2,566 | 20  | 1                          | 0.999  | 0.997   | 0.873   |
| LP46-exfo   | 23,320,752  | 5,392,689           | 31,831,707     | 517      | 991   | 39  | 1                          | 1      | 0.999   | 0.998   |
| LP47-biopsy | 36,932,978  | 452,860             | 19,380,858     | 315      | 1,457 | 6   | 0.999                      | 0.999  | 0.997   | 0.924   |
| LP47-exfo   | 60,679,658  | 6,173,120           | 14,222,374     | 231      | 389   | 17  | 1                          | 1      | 0.998   | 0.903   |
| LP48-biopsy | 37,077,864  | 383,115             | 15,847,215     | 257      | 952   | 9   | 0.999                      | 0.998  | 0.992   | 0.794   |
| LP48-exfo   | 15,786,952  | 4,345,202           | 39,358,671     | 639      | 851   | 46  | 1                          | 1      | 1       | 0.998   |
| LP49-biopsy | 19,622,938  | 411,703             | 17,880,803     | 290      | 812   | 9   | 1                          | 0.999  | 0.996   | 0.889   |
| LP49-exfo   | 8,669,676   | 1,983,467           | 11,477,787     | 186      | 347   | 18  | 1                          | 0.999  | 0.998   | 0.204   |
| LP51-biopsy | 29,827,630  | 306,062             | 12,894,815     | 209      | 1,098 | 5   | 1                          | 0.999  | 0.984   | 0.509   |
| LP51-exfo   | 6,533,890   | 1,501,723           | 10,397,119     | 169      | 321   | 7   | 1                          | 0.998  | 0.997   | 0.043   |
| LP52-biopsy | 22,398,512  | 293,719             | 12,769,187     | 207      | 1,110 | 6   | 0.999                      | 0.998  | 0.972   | 0.534   |

|              |             |            |             |       |       |       |       |       |       |       |
|--------------|-------------|------------|-------------|-------|-------|-------|-------|-------|-------|-------|
| LP52-exfo    | 24,637,542  | 4,841,036  | 21,121,029  | 343   | 827   | 24    | 1     | 1     | 0.999 | 0.998 |
| LP53-biopsy  | 9,795,536   | 190,006    | 8,141,551   | 132   | 495   | 1     | 0.998 | 0.991 | 0.742 | 0.058 |
| LP53-exfo    | 73,213,944  | 16,996,742 | 99,503,154  | 1,616 | 2,535 | 192   | 1     | 1     | 1     | 1     |
| LP56-biopsy  | 18,358,466  | 347,791    | 16,664,585  | 271   | 874   | 4     | 0.999 | 0.998 | 0.996 | 0.875 |
| LP56-exfo    | 13,769,222  | 2,135,809  | 4,159,902   | 68    | 378   | 11    | 0.999 | 0.944 | 0.014 | 0.002 |
| LP57-biopsy  | 33,207,486  | 385,675    | 16,654,225  | 271   | 1,157 | 6     | 0.999 | 0.998 | 0.997 | 0.872 |
| LP57-exfo    | 16,051,452  | 2,686,737  | 5,748,624   | 93    | 378   | 6     | 0.999 | 0.998 | 0.255 | 0.006 |
| LP58-biopsy  | 37,035,856  | 460,021    | 18,233,745  | 296   | 1,215 | 10    | 1     | 0.999 | 0.994 | 0.886 |
| LP58-exfo    | 81,785,544  | 20,316,965 | 150,184,734 | 2,439 | 3,598 | 224   | 1     | 1     | 1     | 1     |
| LP59-biopsy  | 26,967,028  | 299,565    | 12,014,739  | 195   | 1,126 | 9     | 1     | 0.998 | 0.96  | 0.416 |
| LP59-exfo    | 32,023,140  | 9,222,263  | 46,445,299  | 754   | 1,574 | 148   | 1     | 1     | 1     | 1     |
| LP67-biopsy  | 62,025,606  | 876,241    | 37,820,269  | 614   | 3,217 | 47    | 1     | 1     | 0.999 | 0.998 |
| LP68-biopsy  | 42,002,084  | 400,462    | 15,653,098  | 254   | 1,706 | 17    | 1     | 0.999 | 0.996 | 0.817 |
| LP68-exfo    | 16,261,254  | 9,665,377  | 165,782,655 | 2,693 | 3,305 | 101   | 1     | 1     | 1     | 1     |
| AU001        | 32,390,646  | 2,632,460  | 153,705,787 | 2,497 | 3,497 | 432   | 1     | 1     | 1     | 1     |
| BR029        | 88,928,170  | 3,638,318  | 105,943,490 | 2,056 | 3,538 | 433   | 1     | 1     | 1     | 1     |
| BR127        | 140,344,954 | 2,412,692  | 67,515,556  | 1,312 | 3,614 | 486   | 1     | 1     | 1     | 1     |
| BR163        | 39,959,802  | 1,349,469  | 33,867,133  | 673   | 1,766 | 282   | 1     | 1     | 1     | 1     |
| DE005        | 128,237,840 | 4,835,415  | 140,863,060 | 2,653 | 4,309 | 387   | 1     | 1     | 1     | 1     |
| DE007        | 21,427,428  | 2,199,973  | 127,290,158 | 2,068 | 2,890 | 323   | 1     | 1     | 1     | 1     |
| DE008        | 359,741,020 | 1,892,916  | 47,343,060  | 930   | 4,807 | 322   | 1     | 1     | 1     | 1     |
| DE009        | 35,286,902  | 2,385,949  | 134,297,462 | 2,181 | 3,542 | 372   | 1     | 1     | 1     | 1     |
| DE016        | 46,861,260  | 1,608,035  | 50,324,305  | 923   | 1,376 | 147   | 1     | 1     | 1     | 0.999 |
| DE017        | 158,076,658 | 4,680,459  | 130,241,400 | 2,541 | 6,356 | 865   | 1     | 1     | 1     | 1     |
| DE019        | 49,446,428  | 3,413,002  | 196,192,663 | 3,187 | 5,572 | 547   | 1     | 1     | 1     | 1     |
| DE019-lesion | 43,792,338  | 5,855,878  | 348,900,500 | 5,667 | 8,211 | 553   | 1     | 1     | 1     | 1     |
| DE037        | 23,441,854  | 2,261,410  | 121,978,369 | 1,981 | 4,682 | 403   | 1     | 1     | 1     | 1     |
| DE038        | 31,371,500  | 6,594,534  | 409,078,430 | 6,645 | 9,475 | 526   | 1     | 1     | 1     | 1     |
| DE050        | 40,811,278  | 3,005,355  | 166,163,603 | 2,699 | 3,737 | 514   | 1     | 1     | 1     | 1     |
| DE066        | 111,908,982 | 4,946,914  | 152,067,618 | 2,821 | 4,680 | 459   | 1     | 1     | 1     | 1     |
| DE072        | 24,346,490  | 4,012,548  | 230,910,717 | 3,751 | 5,385 | 473   | 1     | 1     | 1     | 1     |
| DE074        | 16,912,566  | 830,194    | 41,377,600  | 672   | 2,468 | 192   | 1     | 1     | 1     | 1     |
| DE075        | 27,906,582  | 1,234,714  | 66,055,507  | 1,073 | 1,904 | 293   | 1     | 1     | 1     | 1     |
| DE076        | 64,760,286  | 6,589,014  | 360,609,073 | 5,857 | 9,655 | 832   | 1     | 1     | 1     | 1     |
| ES026        | 42,416,634  | 1,855,204  | 51,472,409  | 1,017 | 2,142 | 374   | 1     | 1     | 1     | 1     |
| FR017        | 47,993,032  | 566,753    | 14,593,434  | 280   | 1,136 | 51    | 1     | 1     | 0.983 | 0.828 |
| FR037        | 33,536,522  | 1,599,170  | 45,251,160  | 877   | 1,501 | 314   | 1     | 1     | 1     | 1     |
| FR041        | 36,841,210  | 1,984,909  | 57,240,555  | 1,074 | 1,679 | 244   | 1     | 1     | 1     | 1     |
| NL021        | 38,624,730  | 3,065,901  | 164,464,499 | 2,671 | 4,993 | 588   | 1     | 1     | 1     | 1     |
| UK006        | 23,904,224  | 1,202,705  | 62,511,934  | 1,015 | 2,153 | 230   | 1     | 1     | 1     | 1     |
| UK015        | 44,031,828  | 2,511,145  | 68,990,458  | 1,295 | 2,794 | 403   | 1     | 1     | 1     | 1     |
| US001        | 114,068,822 | 1,380,679  | 34,453,448  | 671   | 2,321 | 290   | 1     | 1     | 1     | 1     |
| US002        | 26,070,070  | 334,802    | 8,633,257   | 166   | 847   | 47    | 1     | 1     | 0.986 | 0.024 |
| US003        | 41,980,290  | 3,902,279  | 232,066,536 | 3,769 | 5,186 | 469   | 1     | 1     | 1     | 1     |
| US009        | 108,434,184 | 2,183,373  | 64,530,707  | 1,209 | 2,179 | 366   | 1     | 1     | 1     | 1     |
| US035        | 144,329,718 | 4,519,131  | 134,655,777 | 2,443 | 4,067 | 340   | 1     | 1     | 1     | 1     |
| US045        | 30,877,428  | 1,876,739  | 101,543,476 | 1,649 | 2,721 | 439   | 1     | 1     | 1     | 1     |
| US063        | 20,323,276  | 1,081,262  | 56,833,083  | 923   | 2,465 | 246   | 1     | 1     | 1     | 1     |
| US076        | 39,999,804  | 6,552,794  | 396,219,278 | 6,436 | 8,820 | 580   | 1     | 1     | 1     | 1     |
| US082        | 43,514,926  | 3,559,907  | 197,003,707 | 3,200 | 5,114 | 124   | 1     | 1     | 1     | 0.999 |
| US082-lesion | 12,927,690  | 661,101    | 28,862,458  | 469   | 1,332 | 33    | 1     | 0.999 | 0.994 | 0.984 |
| US094        | 64,205,420  | 3,465,947  | 105,056,105 | 1,979 | 2,804 | 404   | 1     | 1     | 1     | 1     |
| US118        | 84,740,634  | 3,139,700  | 81,054,507  | 1,623 | 3,122 | 628   | 1     | 1     | 1     | 1     |
| US139        | 8,531,834   | 362,088    | 17,586,983  | 286   | 886   | 77    | 1     | 1     | 0.999 | 0.961 |
| US140        | 8,758,822   | 406,266    | 20,236,785  | 329   | 1,641 | 76    | 1     | 1     | 0.999 | 0.962 |
| US162        | 69,739,272  | 3,091,258  | 87,308,154  | 1,695 | 3,366 | 626   | 1     | 1     | 1     | 1     |
| US175        | 76,533,698  | 5,025,857  | 145,625,072 | 2,814 | 5,137 | 717   | 1     | 1     | 1     | 1     |
| US182        | 30,771,018  | 2,659,733  | 138,709,992 | 2,253 | 3,736 | 378   | 1     | 1     | 1     | 1     |
| HC01         | 26,123,730  | 1,832,653  | 111,947,976 | 1,818 | 2,977 | 283   | 1     | 1     | 1     | 1     |
| HC02         | 26,270,396  | 1,694,260  | 104,328,685 | 1,695 | 2,565 | 318   | 1     | 1     | 1     | 1     |
| HC03         | 50,512,744  | 11,670,179 | 199,462,842 | 3,240 | 4,178 | 882   | 1     | 1     | 1     | 1     |
| HC04         | 38,439,720  | 19,204,470 | 340,532,872 | 5,531 | 6,360 | 1,216 | 1     | 1     | 1     | 1     |
| HC05         | 29,006,306  | 1,840,794  | 111,376,725 | 1,809 | 2,709 | 369   | 1     | 1     | 1     | 1     |
| HC06         | 26,164,594  | 1,717,465  | 104,252,986 | 1,693 | 2,388 | 351   | 1     | 1     | 1     | 1     |
| HC07         | 27,184,074  | 4,533,126  | 175,780,222 | 2,855 | 4,809 | 346   | 1     | 1     | 1     | 1     |
| HC08         | 32,958,776  | 5,533,362  | 211,530,933 | 3,436 | 5,998 | 401   | 1     | 1     | 1     | 1     |
| HC09         | 26,627,038  | 5,383,170  | 211,853,189 | 3,441 | 7,279 | 307   | 1     | 1     | 1     | 1     |

|      |            |           |             |       |       |     |   |   |   |       |
|------|------------|-----------|-------------|-------|-------|-----|---|---|---|-------|
| HC10 | 35,342,032 | 5,388,496 | 207,252,951 | 3,366 | 7,288 | 359 | 1 | 1 | 1 | 1     |
| HC11 | 40,304,452 | 6,211,694 | 244,378,348 | 3,969 | 8,892 | 439 | 1 | 1 | 1 | 1     |
| HC12 | 31,486,872 | 5,306,621 | 210,119,566 | 3,413 | 5,948 | 318 | 1 | 1 | 1 | 1     |
| HC13 | 12,840,600 | 2,112,799 | 81,477,533  | 1,323 | 2,581 | 138 | 1 | 1 | 1 | 0.999 |
| HC14 | 24,503,930 | 4,666,571 | 186,935,034 | 3,036 | 5,224 | 285 | 1 | 1 | 1 | 1     |
| HC15 | 20,397,054 | 4,229,742 | 171,825,615 | 2,791 | 5,270 | 257 | 1 | 1 | 1 | 1     |
| HC16 | 24,493,566 | 4,414,613 | 173,623,986 | 2,820 | 5,023 | 279 | 1 | 1 | 1 | 1     |
| HC17 | 36,326,400 | 6,066,356 | 231,967,477 | 3,768 | 6,514 | 421 | 1 | 1 | 1 | 1     |
| HC18 | 28,376,956 | 4,659,944 | 181,690,067 | 2,951 | 5,227 | 330 | 1 | 1 | 1 | 1     |
| HC19 | 21,861,794 | 4,168,667 | 165,090,716 | 2,682 | 5,001 | 277 | 1 | 1 | 1 | 1     |
| HC20 | 13,843,206 | 2,395,335 | 91,952,924  | 1,494 | 2,858 | 124 | 1 | 1 | 1 | 0.999 |
| HC21 | 35,743,404 | 6,144,466 | 243,504,840 | 3,955 | 6,733 | 383 | 1 | 1 | 1 | 1     |
| HC22 | 5,803,052  | 1,064,182 | 40,573,423  | 659   | 1,433 | 85  | 1 | 1 | 1 | 0.996 |
| HC23 | 9,167,150  | 1,454,507 | 56,343,067  | 915   | 1,647 | 87  | 1 | 1 | 1 | 0.998 |
| HC24 | 42,658,320 | 6,916,366 | 268,793,411 | 4,366 | 7,800 | 444 | 1 | 1 | 1 | 1     |
| HC25 | 37,128,986 | 5,353,874 | 212,546,627 | 3,452 | 6,107 | 385 | 1 | 1 | 1 | 1     |
| HC26 | 25,307,850 | 4,587,756 | 178,211,487 | 2,895 | 5,372 | 291 | 1 | 1 | 1 | 1     |
| HC27 | 40,513,722 | 6,268,663 | 244,562,542 | 3,972 | 6,798 | 415 | 1 | 1 | 1 | 1     |
| HC28 | 14,335,308 | 2,532,017 | 101,243,717 | 1,644 | 2,862 | 154 | 1 | 1 | 1 | 1     |
| HC29 | 43,386,054 | 6,892,751 | 276,146,180 | 4,485 | 9,548 | 474 | 1 | 1 | 1 | 1     |
