# Supplementary material for: Oral cancer prediction by noninvasive genetic screening
Source: PubMed Central journal article supplement — Int J Cancer. 2022 Sep 18;152(2):227–38. doi: 10.1002/ijc.34277 (PMC9826173; doi:10.1002/ijc.34277), 2022-09-18
Supplement: IJC-152-227-s005.pdf [file IJC-152-227-s005.pdf]

| Sample     | Total reads | Uniquely mapped     | Used reads | Total covered | Coverage |     |     | Fraction covered |
|------------|-------------|---------------------|------------|---------------|----------|-----|-----|------------------|
|            |             | non-duplicate reads |            | bases         | Mean     | Max | Min | >= 10X           |
| LP09-brush | 15,123,755  | 10,804,355          | 8,618,247  | 430,912,350   | 0.135    | 5   | 0   | 0                |
| LP10-brush | 14,075,213  | 9,178,129           | 7,479,749  | 373,987,450   | 0.117    | 5   | 0   | 0                |
| LP11-brush | 17,206,589  | 9,977,608           | 7,967,230  | 398,361,500   | 0.124    | 5   | 0   | 0                |
| LP12-brush | 17,511,864  | 11,258,916          | 9,184,077  | 459,203,850   | 0.144    | 5   | 0   | 0                |
| LP13-brush | 15,609,121  | 11,239,538          | 8,974,712  | 448,735,600   | 0.14     | 5   | 0   | 0                |
| LP14-brush | 19,654,209  | 14,182,082          | 11,308,773 | 565,438,650   | 0.177    | 6   | 0   | 0                |
| LP15-brush | 14,928,693  | 10,652,822          | 8,497,850  | 424,892,500   | 0.133    | 5   | 0   | 0                |
| LP17-brush | 12,370,090  | 4,834,356           | 3,845,939  | 192,296,950   | 0.06     | 4   | 0   | 0                |
| LP19-brush | 15,049,288  | 10,841,664          | 8,848,304  | 442,415,200   | 0.138    | 5   | 0   | 0                |
| LP20-brush | 15,743,186  | 7,177,739           | 5,854,510  | 292,725,500   | 0.091    | 5   | 0   | 0                |
| LP21-brush | 5,407,536   | 3,058,325           | 2,447,156  | 122,357,800   | 0.038    | 4   | 0   | 0                |
| LP22-brush | 19,847,542  | 13,412,571          | 10,951,922 | 547,596,100   | 0.171    | 6   | 0   | 0                |
| LP25-brush | 20,435,574  | 14,650,134          | 11,702,562 | 585,128,100   | 0.183    | 6   | 0   | 0                |
| LP26-brush | 24,702,184  | 15,483,404          | 12,623,719 | 631,185,950   | 0.197    | 6   | 0   | 0                |
| LP27-brush | 20,654,678  | 11,107,116          | 9,055,645  | 452,782,250   | 0.141    | 5   | 0   | 0                |
| LP28-brush | 8,394,637   | 4,873,422           | 3,976,887  | 198,844,350   | 0.062    | 4   | 0   | 0                |
| LP29-brush | 12,462,120  | 5,598,059           | 4,467,010  | 223,350,500   | 0.07     | 4   | 0   | 0                |
| LP31-brush | 11,568,970  | 8,662,495           | 7,078,481  | 353,924,050   | 0.111    | 5   | 0   | 0                |
| LP32-brush | 13,148,221  | 6,149,673           | 4,905,965  | 245,298,250   | 0.077    | 5   | 0   | 0                |
| LP33-brush | 11,041,726  | 7,472,383           | 6,096,512  | 304,825,600   | 0.095    | 5   | 0   | 0                |
| LP35-brush | 11,918,642  | 8,550,814           | 6,809,260  | 340,463,000   | 0.106    | 5   | 0   | 0                |
| LP39-brush | 12,600,731  | 8,993,648           | 7,348,772  | 367,438,600   | 0.115    | 5   | 0   | 0                |
| LP40-brush | 6,218,978   | 3,076,940           | 2,453,419  | 122,670,950   | 0.038    | 4   | 0   | 0                |
| LP41-brush | 11,920,867  | 6,640,683           | 5,291,719  | 264,585,950   | 0.083    | 5   | 0   | 0                |
| LP42-brush | 4,452,053   | 2,910,578           | 2,373,525  | 118,676,250   | 0.037    | 4   | 0   | 0                |
| LP43-brush | 14,906,107  | 3,262,180           | 2,658,522  | 132,926,100   | 0.042    | 4   | 0   | 0                |
| LP45-brush | 14,232,080  | 10,888,298          | 8,679,698  | 433,984,900   | 0.136    | 5   | 0   | 0                |
| LP46-brush | 91,667,749  | 62,323,615          | 50,869,838 | 2,543,491,900 | 0.795    | 9   | 0   | 0                |
| LP47-brush | 9,563,254   | 6,817,472           | 5,397,911  | 269,895,550   | 0.084    | 5   | 0   | 0                |
| LP48-brush | 9,739,110   | 7,430,313           | 5,920,694  | 296,034,700   | 0.093    | 5   | 0   | 0                |
| LP49-brush | 17,365,659  | 8,907,131           | 7,098,586  | 354,929,300   | 0.111    | 5   | 0   | 0                |
| LP51-brush | 10,392,959  | 5,440,076           | 4,334,161  | 216,708,050   | 0.068    | 4   | 0   | 0                |
| LP52-brush | 3,837,489   | 2,845,841           | 2,273,094  | 113,654,700   | 0.036    | 4   | 0   | 0                |
| LP53-brush | 8,346,989   | 5,382,328           | 4,289,144  | 214,457,200   | 0.067    | 4   | 0   | 0                |
| LP56-brush | 12,449,012  | 8,682,628           | 7,077,506  | 353,875,300   | 0.111    | 5   | 0   | 0                |
| LP57-brush | 9,245,226   | 6,719,326           | 5,479,826  | 273,991,300   | 0.086    | 5   | 0   | 0                |
| LP58-brush | 29,167,158  | 21,829,577          | 17,437,522 | 871,876,100   | 0.272    | 7   | 0   | 0                |
| LP59-brush | 6,333,622   | 1,307,746           | 1,038,941  | 51,947,050    | 0.016    | 3   | 0   | 0                |
| LP65-brush | 12,198,434  | 7,117,366           | 5,654,501  | 282,725,050   | 0.088    | 5   | 0   | 0                |
| LP67-brush | 12,129,966  | 7,647,853           | 6,206,626  | 310,331,300   | 0.097    | 5   | 0   | 0                |
| LP68-brush | 15,108,721  | 9,964,107           | 7,943,110  | 397,155,500   | 0.124    | 5   | 0   | 0                |
| AU001      | 14,412,846  | 7,863,064           | 6,270,565  | 313,528,250   | 0.098    | 5   | 0   | 0                |
| BR029      | 38,280,896  | 21,889,042          | 17,862,512 | 893,125,600   | 0.279    | 7   | 0   | 0                |
| BR127      | 26,856,754  | 15,895,596          | 12,969,790 | 648,489,500   | 0.203    | 6   | 0   | 0                |
| BR163      | 29,436,723  | 5,968,813           | 4,770,260  | 238,513,000   | 0.075    | 5   | 0   | 0                |
| DE005      | 40,442,232  | 16,438,202          | 13,144,473 | 657,223,650   | 0.205    | 6   | 0   | 0                |
| DE007      | 11,956,972  | 5,550,016           | 4,423,787  | 221,189,350   | 0.069    | 4   | 0   | 0                |
| DE008      | 126,349,414 | 60,053,867          | 49,027,896 | 2,451,394,800 | 0.766    | 9   | 0   | 0                |

|              |            |            |            |               |       |   |   |   |
|--------------|------------|------------|------------|---------------|-------|---|---|---|
| DE009        | 15,887,840 | 9,471,911  | 7,723,903  | 386,195,150   | 0.121 | 5 | 0 | 0 |
| DE016        | 13,789,463 | 8,623,427  | 7,040,313  | 352,015,650   | 0.11  | 5 | 0 | 0 |
| DE017        | 37,493,706 | 22,227,403 | 17,723,355 | 886,167,750   | 0.277 | 7 | 0 | 0 |
| DE019        | 22,755,433 | 13,580,530 | 10,857,025 | 542,851,250   | 0.17  | 6 | 0 | 0 |
| DE019-lesion | 23,908,816 | 12,167,928 | 9,780,708  | 489,035,400   | 0.153 | 5 | 0 | 0 |
| DE037        | 14,051,403 | 6,814,128  | 5,459,880  | 272,994,000   | 0.085 | 5 | 0 | 0 |
| DE038        | 13,612,750 | 8,150,627  | 6,496,983  | 324,849,150   | 0.102 | 5 | 0 | 0 |
| DE050        | 16,252,258 | 11,052,647 | 8,998,306  | 449,915,300   | 0.141 | 5 | 0 | 0 |
| DE066        | 14,520,766 | 9,290,174  | 7,581,691  | 379,084,550   | 0.118 | 5 | 0 | 0 |
| DE072        | 11,745,639 | 7,073,600  | 5,644,747  | 282,237,350   | 0.088 | 5 | 0 | 0 |
| DE074        | 10,366,807 | 5,454,858  | 4,457,567  | 222,878,350   | 0.07  | 4 | 0 | 0 |
| DE075        | 10,874,858 | 7,519,835  | 6,003,407  | 300,170,350   | 0.094 | 5 | 0 | 0 |
| DE076        | 24,820,241 | 16,881,179 | 13,753,370 | 687,668,500   | 0.215 | 6 | 0 | 0 |
| ES026        | 15,272,927 | 6,925,328  | 5,643,184  | 282,159,200   | 0.088 | 5 | 0 | 0 |
| ES040        | 20,147,297 | 9,804,026  | 7,821,882  | 391,094,100   | 0.122 | 5 | 0 | 0 |
| FR017        | 7,169,025  | 3,923,934  | 3,196,261  | 159,813,050   | 0.05  | 4 | 0 | 0 |
| FR037        | 9,021,183  | 5,742,525  | 4,578,668  | 228,933,400   | 0.072 | 4 | 0 | 0 |
| FR041        | 21,436,057 | 6,556,238  | 5,353,962  | 267,698,100   | 0.084 | 5 | 0 | 0 |
| NL021        | 15,967,809 | 10,973,233 | 8,777,035  | 438,851,750   | 0.137 | 5 | 0 | 0 |
| PT002        | 41,320,402 | 8,696,263  | 7,097,522  | 354,876,100   | 0.111 | 5 | 0 | 0 |
| UK006        | 10,534,047 | 6,668,463  | 5,337,680  | 266,884,000   | 0.083 | 5 | 0 | 0 |
| UK015        | 32,677,853 | 16,514,614 | 13,188,509 | 659,425,450   | 0.206 | 6 | 0 | 0 |
| US001        | 30,183,287 | 17,357,962 | 13,857,764 | 692,888,200   | 0.217 | 6 | 0 | 0 |
| US002        | 10,976,849 | 3,296,337  | 2,629,325  | 131,466,250   | 0.041 | 4 | 0 | 0 |
| US003        | 16,150,773 | 10,069,047 | 8,030,118  | 401,505,900   | 0.125 | 5 | 0 | 0 |
| US009        | 31,075,548 | 19,781,660 | 16,134,366 | 806,718,300   | 0.252 | 6 | 0 | 0 |
| US035        | 34,269,876 | 21,869,990 | 17,615,711 | 880,785,550   | 0.275 | 7 | 0 | 0 |
| US045        | 14,299,382 | 8,598,438  | 7,025,743  | 351,287,150   | 0.11  | 5 | 0 | 0 |
| US063        | 9,657,507  | 5,879,759  | 4,802,501  | 240,125,050   | 0.075 | 5 | 0 | 0 |
| US071        | 5,457,689  | 2,219,128  | 1,806,922  | 90,346,100    | 0.028 | 4 | 0 | 0 |
| US076        | 17,749,712 | 10,807,225 | 8,601,265  | 430,063,250   | 0.134 | 5 | 0 | 0 |
| US082        | 19,062,608 | 12,486,711 | 9,963,121  | 498,156,050   | 0.156 | 6 | 0 | 0 |
| US082-lesion | 9,207,798  | 3,505,680  | 2,792,587  | 139,629,350   | 0.044 | 4 | 0 | 0 |
| US094        | 16,127,744 | 7,353,034  | 5,999,770  | 299,988,500   | 0.094 | 5 | 0 | 0 |
| US118        | 23,749,935 | 15,263,501 | 12,460,865 | 623,043,250   | 0.195 | 6 | 0 | 0 |
| US139        | 7,091,755  | 2,962,424  | 2,419,441  | 120,972,050   | 0.038 | 4 | 0 | 0 |
| US140        | 12,618,679 | 3,003,649  | 2,402,552  | 120,127,600   | 0.038 | 4 | 0 | 0 |
| US162        | 23,173,233 | 14,918,405 | 12,159,202 | 607,960,100   | 0.19  | 6 | 0 | 0 |
| US175        | 24,215,088 | 16,048,516 | 13,104,957 | 655,247,850   | 0.205 | 6 | 0 | 0 |
| US182        | 14,440,902 | 9,798,794  | 7,818,709  | 390,935,450   | 0.122 | 5 | 0 | 0 |
| HC01         | 15,285,460 | 11,243,696 | 9,180,375  | 459,018,750   | 0.143 | 5 | 0 | 0 |
| HC02         | 18,873,604 | 13,589,787 | 11,110,148 | 555,507,400   | 0.174 | 6 | 0 | 0 |
| HC03         | 36,748,289 | 27,669,294 | 22,585,912 | 1,129,295,600 | 0.353 | 7 | 0 | 0 |
| HC04         | 18,162,034 | 13,277,096 | 10,899,750 | 544,987,500   | 0.17  | 6 | 0 | 0 |
| HC05         | 16,691,302 | 12,153,482 | 9,918,352  | 495,917,600   | 0.155 | 6 | 0 | 0 |
| HC06         | 17,500,358 | 12,780,645 | 10,199,328 | 509,966,400   | 0.159 | 6 | 0 | 0 |
| HC07         | 12,734,148 | 7,517,961  | 6,136,904  | 306,845,200   | 0.096 | 5 | 0 | 0 |
| HC08         | 14,578,476 | 9,825,459  | 7,838,523  | 391,926,150   | 0.122 | 5 | 0 | 0 |
| HC09         | 12,722,756 | 7,672,464  | 6,116,893  | 305,844,650   | 0.096 | 5 | 0 | 0 |
| HC10         | 14,051,320 | 9,668,560  | 7,712,719  | 385,635,950   | 0.121 | 5 | 0 | 0 |

|             |            |            |            |             |       |   |   |   |
|-------------|------------|------------|------------|-------------|-------|---|---|---|
| HC11        | 19,737,681 | 10,905,384 | 8,692,843  | 434,642,150 | 0.136 | 5 | 0 | 0 |
| HC12        | 13,964,740 | 8,806,439  | 7,191,124  | 359,556,200 | 0.112 | 5 | 0 | 0 |
| HC13        | 15,554,173 | 3,501,726  | 2,793,646  | 139,682,300 | 0.044 | 4 | 0 | 0 |
| HC14        | 15,440,714 | 7,029,607  | 5,606,867  | 280,343,350 | 0.088 | 5 | 0 | 0 |
| HC15        | 7,539,512  | 5,315,999  | 4,336,564  | 216,828,200 | 0.068 | 4 | 0 | 0 |
| HC16        | 14,333,798 | 7,178,358  | 5,728,586  | 286,429,300 | 0.09  | 5 | 0 | 0 |
| HC17        | 14,895,133 | 10,165,626 | 8,114,568  | 405,728,400 | 0.127 | 5 | 0 | 0 |
| HC18        | 11,857,371 | 7,713,370  | 6,146,591  | 307,329,550 | 0.096 | 5 | 0 | 0 |
| HC19        | 11,244,870 | 5,989,707  | 4,775,760  | 238,788,000 | 0.075 | 5 | 0 | 0 |
| HC20        | 13,502,445 | 3,630,005  | 2,961,612  | 148,080,600 | 0.046 | 4 | 0 | 0 |
| HC21        | 16,907,972 | 9,987,814  | 8,149,910  | 407,495,500 | 0.127 | 5 | 0 | 0 |
| HC22        | 12,768,536 | 1,551,927  | 1,266,996  | 63,349,800  | 0.02  | 3 | 0 | 0 |
| HC23        | 15,088,439 | 2,531,260  | 2,019,809  | 100,990,450 | 0.032 | 4 | 0 | 0 |
| HC24        | 18,144,435 | 11,827,227 | 9,658,411  | 482,920,550 | 0.151 | 5 | 0 | 0 |
| HC25        | 18,558,908 | 10,249,880 | 8,370,309  | 418,515,450 | 0.131 | 5 | 0 | 0 |
| HC26        | 12,686,080 | 6,959,602  | 5,679,925  | 283,996,250 | 0.089 | 5 | 0 | 0 |
| HC27        | 16,907,160 | 10,707,807 | 8,740,251  | 437,012,550 | 0.137 | 5 | 0 | 0 |
| HC28        | 13,035,319 | 3,941,768  | 3,218,452  | 160,922,600 | 0.05  | 4 | 0 | 0 |
| HC29        | 18,548,889 | 11,378,232 | 9,283,476  | 464,173,800 | 0.145 | 5 | 0 | 0 |
| LP09-biopsy | 2,188,017  | 1,144,697  | 910,121    | 45,506,050  | 0.014 | 3 | 0 | 0 |
| LP10-biopsy | 6,919,774  | 4,140,856  | 3,370,476  | 168,523,800 | 0.053 | 4 | 0 | 0 |
| LP11-biopsy | 9,469,274  | 6,082,582  | 4,863,609  | 243,180,450 | 0.076 | 5 | 0 | 0 |
| LP12-biopsy | 7,706,285  | 4,623,513  | 3,764,357  | 188,217,850 | 0.059 | 4 | 0 | 0 |
| LP13-biopsy | 12,520,671 | 8,266,360  | 6,607,224  | 330,361,200 | 0.103 | 5 | 0 | 0 |
| LP14-biopsy | 8,007,115  | 4,987,274  | 3,988,421  | 199,421,050 | 0.062 | 4 | 0 | 0 |
| LP15-biopsy | 9,871,929  | 6,472,332  | 5,168,053  | 258,402,650 | 0.081 | 5 | 0 | 0 |
| LP17-biopsy | 9,103,090  | 5,603,866  | 4,475,159  | 223,757,950 | 0.07  | 4 | 0 | 0 |
| LP19-biopsy | 11,121,456 | 7,453,477  | 6,072,605  | 303,630,250 | 0.095 | 5 | 0 | 0 |
| LP20-biopsy | 8,647,255  | 5,148,409  | 4,193,414  | 209,670,700 | 0.066 | 4 | 0 | 0 |
| LP21-biopsy | 7,764,315  | 4,714,904  | 3,755,460  | 187,773,000 | 0.059 | 4 | 0 | 0 |
| LP22-biopsy | 12,057,770 | 8,377,889  | 6,815,518  | 340,775,900 | 0.106 | 5 | 0 | 0 |
| LP25-biopsy | 12,098,129 | 7,955,654  | 6,370,132  | 318,506,600 | 0.1   | 5 | 0 | 0 |
| LP26-biopsy | 12,317,277 | 7,886,812  | 6,423,362  | 321,168,100 | 0.1   | 5 | 0 | 0 |
| LP27-biopsy | 6,444,705  | 3,676,130  | 2,983,509  | 149,175,450 | 0.047 | 4 | 0 | 0 |
| LP28-biopsy | 14,622,706 | 8,540,288  | 6,943,287  | 347,164,350 | 0.108 | 5 | 0 | 0 |
| LP29-biopsy | 13,918,089 | 8,002,346  | 6,414,604  | 320,730,200 | 0.1   | 5 | 0 | 0 |
| LP31-biopsy | 12,365,056 | 7,745,367  | 6,315,353  | 315,767,650 | 0.099 | 5 | 0 | 0 |
| LP32-biopsy | 12,646,899 | 7,123,159  | 5,697,642  | 284,882,100 | 0.089 | 5 | 0 | 0 |
| LP33-biopsy | 9,677,124  | 5,871,218  | 4,779,833  | 238,991,650 | 0.075 | 5 | 0 | 0 |
| LP35-biopsy | 3,410,342  | 2,134,129  | 1,708,044  | 85,402,200  | 0.027 | 4 | 0 | 0 |
| LP39-biopsy | 17,899,373 | 11,606,358 | 9,438,731  | 471,936,550 | 0.147 | 5 | 0 | 0 |
| LP40-biopsy | 13,214,785 | 7,796,233  | 6,207,190  | 310,359,500 | 0.097 | 5 | 0 | 0 |
| LP41-biopsy | 12,518,862 | 7,322,896  | 5,876,737  | 293,836,850 | 0.092 | 5 | 0 | 0 |
| LP42-biopsy | 14,284,920 | 9,152,879  | 7,469,454  | 373,472,700 | 0.117 | 5 | 0 | 0 |
| LP43-biopsy | 2,547,864  | 1,596,420  | 1,301,902  | 65,095,100  | 0.02  | 3 | 0 | 0 |
| LP45-biopsy | 13,945,568 | 8,895,528  | 7,129,524  | 356,476,200 | 0.111 | 5 | 0 | 0 |
| LP46-biopsy | 19,488,609 | 12,409,315 | 10,072,286 | 503,614,300 | 0.157 | 6 | 0 | 0 |
| LP47-biopsy | 17,070,254 | 11,262,006 | 8,853,578  | 442,678,900 | 0.138 | 5 | 0 | 0 |
| LP48-biopsy | 14,905,354 | 9,670,395  | 7,729,222  | 386,461,100 | 0.121 | 5 | 0 | 0 |
| LP49-biopsy | 8,789,864  | 5,447,415  | 4,357,354  | 217,867,700 | 0.068 | 4 | 0 | 0 |

|             |            |            |            |               |       |   |   |   |
|-------------|------------|------------|------------|---------------|-------|---|---|---|
| LP51-biopsy | 4,919,184  | 3,114,964  | 2,495,634  | 124,781,700   | 0.039 | 4 | 0 | 0 |
| LP52-biopsy | 15,212,501 | 9,689,644  | 7,789,521  | 389,476,050   | 0.122 | 5 | 0 | 0 |
| LP53-biopsy | 5,058,135  | 3,124,768  | 2,498,978  | 124,948,900   | 0.039 | 4 | 0 | 0 |
| LP56-biopsy | 9,192,600  | 6,038,557  | 4,929,890  | 246,494,500   | 0.077 | 5 | 0 | 0 |
| LP57-biopsy | 10,468,226 | 6,980,640  | 5,700,527  | 285,026,350   | 0.089 | 5 | 0 | 0 |
| LP58-biopsy | 17,566,415 | 11,304,924 | 9,042,338  | 452,116,900   | 0.141 | 5 | 0 | 0 |
| LP59-biopsy | 18,885,285 | 11,355,489 | 9,120,317  | 456,015,850   | 0.143 | 5 | 0 | 0 |
| LP65-biopsy | 3,264,691  | 2,255,197  | 1,803,360  | 90,168,000    | 0.028 | 4 | 0 | 0 |
| LP67-biopsy | 13,692,963 | 9,333,256  | 7,615,336  | 380,766,800   | 0.119 | 5 | 0 | 0 |
| LP68-biopsy | 6,484,704  | 4,472,039  | 3,583,552  | 179,177,600   | 0.056 | 4 | 0 | 0 |
| FC01-biopsy | 2,714,494  | 1,510,446  | 1,193,626  | 59,681,300    | 0.019 | 3 | 0 | 0 |
| FC02-biopsy | 5,389,388  | 2,901,670  | 2,296,901  | 114,845,050   | 0.036 | 4 | 0 | 0 |
| FC03-biopsy | 4,056,988  | 2,206,223  | 1,739,661  | 86,983,050    | 0.027 | 4 | 0 | 0 |
| FC04-biopsy | 12,392,748 | 6,414,939  | 5,077,818  | 253,890,900   | 0.079 | 5 | 0 | 0 |
| FC05-biopsy | 3,763,666  | 2,291,044  | 1,817,669  | 90,883,450    | 0.028 | 4 | 0 | 0 |
| FC06-biopsy | 10,798,257 | 6,549,611  | 5,298,610  | 264,930,500   | 0.083 | 5 | 0 | 0 |
| FC07-biopsy | 3,581,860  | 2,192,679  | 1,780,155  | 89,007,750    | 0.028 | 4 | 0 | 0 |
| FC08-biopsy | 10,900,921 | 5,637,689  | 4,463,109  | 223,155,450   | 0.07  | 4 | 0 | 0 |
| FC09-biopsy | 21,986,056 | 11,182,744 | 9,039,596  | 451,979,800   | 0.141 | 5 | 0 | 0 |
| FC10-biopsy | 8,904,498  | 4,851,583  | 3,831,283  | 191,564,150   | 0.06  | 4 | 0 | 0 |
| FC11-biopsy | 2,679,491  | 1,616,825  | 1,311,066  | 65,553,300    | 0.02  | 3 | 0 | 0 |
| FC12-biopsy | 7,859,872  | 3,681,611  | 2,984,458  | 149,222,900   | 0.047 | 4 | 0 | 0 |
| FC13-biopsy | 6,689,381  | 4,978,422  | 4,085,832  | 204,291,600   | 0.064 | 4 | 0 | 0 |
| FC14-biopsy | 3,940,991  | 2,133,184  | 1,735,768  | 86,788,400    | 0.027 | 4 | 0 | 0 |
| FC15-biopsy | 7,852,121  | 3,604,801  | 2,851,521  | 142,576,050   | 0.045 | 4 | 0 | 0 |
| FC16-biopsy | 9,263,637  | 5,270,812  | 4,180,793  | 209,039,650   | 0.065 | 4 | 0 | 0 |
| FC17-biopsy | 8,010,559  | 3,916,408  | 3,184,520  | 159,226,000   | 0.05  | 4 | 0 | 0 |
| FC18-biopsy | 2,714,365  | 1,219,762  | 986,426    | 49,321,300    | 0.015 | 3 | 0 | 0 |
| FC19-biopsy | 8,091,774  | 3,314,655  | 2,687,491  | 134,374,550   | 0.042 | 4 | 0 | 0 |
| FC20-biopsy | 11,712,991 | 6,388,623  | 5,191,404  | 259,570,200   | 0.081 | 5 | 0 | 0 |
| FC21-biopsy | 5,918,951  | 2,707,386  | 2,190,190  | 109,509,500   | 0.034 | 4 | 0 | 0 |
| FC22-biopsy | 8,909,858  | 3,512,067  | 2,856,920  | 142,846,000   | 0.045 | 4 | 0 | 0 |
| FC23-biopsy | 7,369,895  | 4,017,417  | 3,266,141  | 163,307,050   | 0.051 | 4 | 0 | 0 |
| FC24-biopsy | 9,438,854  | 3,812,036  | 3,011,808  | 150,590,400   | 0.047 | 4 | 0 | 0 |
| FC25-biopsy | 4,680,112  | 1,919,614  | 1,520,305  | 76,015,250    | 0.024 | 3 | 0 | 0 |
| FC26-biopsy | 8,756,772  | 4,650,387  | 3,693,222  | 184,661,100   | 0.058 | 4 | 0 | 0 |
| FC27-biopsy | 10,174,908 | 5,404,077  | 4,416,654  | 220,832,700   | 0.069 | 4 | 0 | 0 |
| FC28-biopsy | 3,501,393  | 1,909,482  | 1,563,635  | 78,181,750    | 0.024 | 3 | 0 | 0 |
| FC29-biopsy | 5,296,739  | 2,382,698  | 1,931,171  | 96,558,550    | 0.03  | 4 | 0 | 0 |
| FC30-biopsy | 16,796,039 | 11,211,546 | 9,029,367  | 451,468,350   | 0.141 | 5 | 0 | 0 |
| FC31-biopsy | 12,132,865 | 7,563,893  | 6,057,899  | 302,894,950   | 0.095 | 5 | 0 | 0 |
| FC32-biopsy | 7,962,045  | 4,272,037  | 3,466,138  | 173,306,900   | 0.054 | 4 | 0 | 0 |
| FC33-biopsy | 11,042,262 | 6,153,820  | 5,002,694  | 250,134,700   | 0.078 | 5 | 0 | 0 |
| FC34-biopsy | 44,792,926 | 29,396,154 | 24,049,221 | 1,202,461,050 | 0.376 | 7 | 0 | 0 |
| FC35-biopsy | 3,872,886  | 3,003,110  | 2,454,634  | 122,731,700   | 0.038 | 4 | 0 | 0 |
| FC36-biopsy | 2,888,363  | 1,797,975  | 1,421,904  | 71,095,200    | 0.022 | 3 | 0 | 0 |
| FC37-biopsy | 4,686,859  | 3,398,182  | 2,771,921  | 138,596,050   | 0.043 | 4 | 0 | 0 |
| FC38-biopsy | 3,765,861  | 2,808,670  | 2,290,219  | 114,510,950   | 0.036 | 4 | 0 | 0 |
| FC39-biopsy | 6,010,295  | 4,397,120  | 3,571,670  | 178,583,500   | 0.056 | 4 | 0 | 0 |
| FC40-biopsy | 4,092,961  | 2,729,682  | 2,205,776  | 110,288,800   | 0.034 | 4 | 0 | 0 |

|             |           |           |           |             |       |   |   |   |
|-------------|-----------|-----------|-----------|-------------|-------|---|---|---|
| FC41-biopsy | 5,983,688 | 4,530,965 | 3,690,659 | 184,532,950 | 0.058 | 4 | 0 | 0 |
| FC42-biopsy | 3,845,158 | 1,878,638 | 1,506,823 | 75,341,150  | 0.024 | 3 | 0 | 0 |
| FC43-biopsy | 4,461,148 | 3,442,742 | 2,746,680 | 137,334,000 | 0.043 | 4 | 0 | 0 |
| FC44-biopsy | 4,581,264 | 3,571,580 | 2,850,279 | 142,513,950 | 0.045 | 4 | 0 | 0 |
| FC45-biopsy | 2,470,365 | 1,651,663 | 1,332,780 | 66,639,000  | 0.021 | 3 | 0 | 0 |
| FC46-biopsy | 6,620,904 | 5,085,830 | 4,153,334 | 207,666,700 | 0.065 | 4 | 0 | 0 |
